# Supplementary material for: Determining causes of genetic isolation in a large carnivore (Ursus americanus) population to direct contemporary conservation measures
Source: PLoS One. 2017 Feb 24;12(2):e0172319. doi: 10.1371/journal.pone.0172319 (PMC5325280; doi:10.1371/journal.pone.0172319)
Supplement: S1 Table — This file contains the multilocus genotypes for the 842 American black bears used in this study. The data are formatted with two columns per locus. (XLSX) [file pone.0172319.s002.xlsx]

## Sheet: 3pops-high
14	906	3	647	56	203		906
SouthBP-Cockburn-BP-Genalex			SouthBP	4400noP	8301noP
Sample	Pop	G10J		G10B		G1D		G10H		G10L		MU05		G1A		G10C		G10U		G10X		MSUT6		G10M		MU59		MU50
	SouthBP1	106	106	159	159	178	180	273	293	152	156	137	139	190	190	115	117	178	180	140	156	172	174	207	213	121	123	210	220
	SouthBP2	100	100	159	159	178	184	273	283	138	140	137	137	190	192	115	117	178	180	142	156	178	182	207	209	115	123	222	226
	SouthBP3	90	102	163	165	180	188	269	293	144	158	137	137	190	190	113	115	180	180	140	140	178	180	211	211	121	123	222	226
	SouthBP4	92	98	159	159	174	182	273	293	140	142	135	137	188	190	101	115	178	178	140	140	174	178	211	217	121	121	220	222
	SouthBP5	90	96	167	167	176	190	273	273	140	152	141	143	190	192	115	115	174	178	128	138	178	178	213	213	117	121	208	212
	SouthBP6	88	94	161	161	178	188	269	273	146	146	139	141	190	190	113	115	178	178	140	146	174	178	211	213	115	125	206	208
	SouthBP7	100	108	159	163	178	180	273	281	140	142	137	141	190	192	113	115	176	178	140	146	178	178	213	215	117	123	206	224
	SouthBP8	106	108	163	167	174	180	271	275	142	158	133	135	186	194	117	117	180	180	138	156	178	182	205	213	113	127	208	214
	SouthBP9	88	106	159	161	178	186	271	271	138	152	141	147	192	194	113	115	178	178	150	156	176	180	211	217	119	125	206	226
	SouthBP10	96	100	159	159	178	180	267	293	154	156	137	141	184	190	111	115	178	180	138	158	170	178	211	213	119	123	208	220
	SouthBP11	104	104	159	159	178	186	283	283	156	158	137	137	186	196	107	117	176	178	150	150	174	178	205	217	119	121	224	228
	SouthBP12	90	90	159	163	180	184	265	283	140	156	137	137	190	194	113	115	176	180	144	148	178	180	207	217	121	121	206	208
	SouthBP13	96	100	155	159	178	186	273	283	138	152	141	147	184	188	113	117	174	180	142	144	174	182	211	215	119	121	206	222
	SouthBP14	104	106	159	163	178	188	281	307	142	146	139	141	190	192	113	113	178	178	140	156	174	178	205	215	115	115	208	226
	SouthBP15	88	96	159	167	178	184	271	275	142	144	137	141	186	192	117	117	178	180	140	142	174	182	205	217	115	127	206	222
	SouthBP16	104	104	159	159	178	184	265	273	154	158	137	137	192	192	109	109	180	180	136	140	178	182	205	213	119	125	208	220
	SouthBP17	88	106	161	163	178	178	273	283	138	142	137	139	190	194	111	117	178	180	138	140	174	178	217	219	119	123	206	218
	SouthBP18	104	104	163	163	178	178	269	293	152	156	139	145	190	190	117	117	174	180	128	140	174	174	219	219	123	127	218	222
	SouthBP19	88	106	163	163	178	188	265	273	158	162	139	139	192	194	107	115	178	178	134	148	178	178	211	211	117	123	208	212
	SouthBP20	98	106	155	167	184	188	287	293	152	156	137	137	188	194	113	117	178	180	144	148	174	178	207	213	115	119	206	220
	SouthBP21	98	104	161	161	178	186	269	283	146	156	137	147	186	194	115	117	176	178	150	152	174	178	205	217	119	121	212	224
	SouthBP22	104	106	161	163	184	188	289	293	140	152	137	147	190	194	111	117	178	180	140	156	178	178	205	209	115	123	200	212
	SouthBP23	88	92	155	159	178	188	277	281	140	142	137	141	192	194	113	113	174	178	120	156	178	178	205	207	113	115	206	208
	SouthBP24	104	106	163	163	178	186	271	273	142	156	137	137	190	192	101	115	176	178	140	152	178	178	205	209	123	127	208	214
	SouthBP25	96	106	167	167	184	188	273	273	140	152	137	137	190	192	105	115	176	178	134	152	166	174	209	217	119	123	206	212
	SouthBP26	98	104	159	161	178	182	271	299	142	160	133	137	190	192	117	117	178	180	138	158	172	182	207	211	121	127	222	224
	SouthBP27	88	100	161	167	176	178	283	291	142	152	139	141	188	190	107	111	174	174	138	142	172	178	213	215	119	121	212	228
	SouthBP28	104	106	161	167	180	180	273	291	140	156	137	137	190	192	113	119	174	180	150	156	178	182	213	217	119	125	208	226
	SouthBP29	88	94	159	161	178	188	269	273	146	156	137	139	190	190	107	115	178	178	146	150	174	178	211	213	119	121	206	208
	SouthBP30	104	106	159	161	180	184	273	291	140	156	137	137	190	192	113	115	174	180	150	156	178	182	213	217	119	121	208	208
	SouthBP31	104	106	163	167	174	178	269	271	142	156	133	135	186	190	117	117	180	180	138	140	174	178	213	219	113	127	208	214
	SouthBP32	88	104	-9	-9	178	186	287	291	152	156	141	151	192	194	-9	-9	178	180	146	150	172	176	207	213	119	121	220	222
	SouthBP33	88	106	163	163	180	182	265	289	138	140	141	141	194	194	117	117	176	178	144	152	174	180	205	209	121	125	206	212
	SouthBP34	88	88	159	163	186	188	273	281	140	142	137	143	194	198	101	117	176	178	146	146	174	178	205	207	119	127	208	226
	SouthBP35	96	100	159	163	176	178	273	303	138	158	139	141	188	190	105	111	180	182	146	156	172	178	215	219	119	121	208	212
	SouthBP36	100	104	163	165	184	186	269	275	138	154	137	141	202	202	105	107	176	180	148	156	174	174	213	217	115	125	208	222
	SouthBP37	88	94	-9	-9	180	190	281	289	138	146	139	143	186	198	105	107	178	178	146	154	174	182	207	209	113	119	-9	-9
	SouthBP38	100	100	159	163	182	186	265	283	138	140	139	139	190	194	107	111	174	178	128	146	178	178	205	213	113	119	200	208
	SouthBP39	88	96	159	165	178	186	271	273	140	142	137	143	198	200	109	119	178	178	-9	-9	178	178	205	207	119	127	208	224
	SouthBP40	88	88	163	163	180	182	265	273	138	152	137	141	192	194	107	117	178	178	144	148	174	174	205	213	119	121	208	212
	SouthBP41	90	106	161	167	184	188	269	273	140	162	137	141	190	190	107	115	174	176	138	142	174	178	211	215	119	121	206	220
	SouthBP42	100	108	163	167	178	180	273	289	140	156	137	137	188	190	105	115	178	178	150	150	178	182	211	213	113	125	208	210
	SouthBP43	88	104	159	163	178	180	273	281	140	158	139	147	194	194	105	113	176	180	154	156	172	180	207	211	123	125	200	222
	SouthBP44	96	104	159	163	180	180	267	273	132	156	137	141	184	184	105	111	178	180	138	152	170	178	213	217	119	123	206	208
	SouthBP45	88	100	161	163	178	180	269	273	152	152	137	137	192	192	107	117	178	178	148	156	174	178	205	213	117	119	-9	-9
	SouthBP46	88	96	157	159	178	184	285	285	156	162	139	143	198	200	117	119	178	178	138	156	170	178	205	207	115	119	-9	-9
	SouthBP47	88	100	159	161	178	188	273	295	142	156	137	139	190	194	115	117	178	178	142	156	178	178	215	219	113	119	210	220
	SouthBP48	90	100	155	163	178	186	269	289	140	156	137	137	192	194	105	115	178	180	140	144	174	178	209	213	119	121	208	224
	SouthBP49	88	106	163	165	180	182	265	265	138	140	137	141	194	194	117	117	176	178	144	152	174	180	205	209	121	125	206	212
	SouthBP50	100	100	163	163	184	186	269	273	154	156	141	141	190	202	105	115	174	180	156	156	174	174	205	217	119	125	220	222
	SouthBP51	100	106	159	159	186	190	263	283	138	140	139	139	196	196	113	117	178	180	134	140	-9	-9	209	211	119	121	210	228
	SouthBP52	94	96	159	163	178	180	275	293	146	158	135	139	186	194	105	113	178	180	146	146	178	180	211	211	113	113	210	228
	SouthBP53	96	104	159	159	178	182	273	293	158	158	135	137	190	194	113	117	178	180	156	156	178	178	207	211	113	119	206	228
	SouthBP54	104	106	159	159	182	188	267	293	158	158	135	137	190	194	117	117	174	180	148	156	178	182	211	213	119	121	206	218
	SouthBP55	88	106	163	167	178	180	269	273	152	158	137	139	186	196	113	115	178	180	-9	-9	-9	-9	207	211	121	125	220	222
	SouthBP56	96	96	159	167	178	178	275	285	154	156	137	141	190	194	117	117	178	178	134	138	178	178	209	211	119	121	210	220
	SouthBP57	104	106	163	165	180	190	289	289	138	158	137	147	192	194	111	117	178	178	-9	-9	-9	-9	205	207	121	123	200	212
	SouthBP58	88	104	159	159	178	180	271	271	152	156	137	141	190	202	111	117	174	178	134	140	172	178	211	219	113	121	200	220
	SouthBP59	88	104	159	167	180	186	273	285	138	154	137	141	192	194	113	119	178	178	146	156	178	178	207	213	123	127	226	226
	SouthBP60	100	104	159	161	178	178	265	285	140	156	139	141	186	188	117	119	178	178	142	154	174	178	209	217	121	127	208	230
	SouthBP61	96	102	159	159	174	186	265	269	142	166	137	139	192	198	115	117	178	178	156	156	174	174	205	215	125	127	222	228
	SouthBP62	94	104	159	163	178	180	283	283	140	142	137	137	194	194	111	117	178	180	144	156	178	178	213	213	113	121	210	212
	SouthBP63	88	88	159	163	176	178	265	277	156	158	139	141	192	194	115	117	178	178	134	140	178	180	207	207	121	121	220	224
	SouthBP64	88	104	159	163	178	178	293	293	142	166	137	139	192	194	105	111	174	176	140	152	178	178	207	207	117	119	212	228
	SouthBP65	96	108	161	165	178	188	265	285	138	152	137	141	190	192	111	117	178	178	138	140	-9	-9	207	207	117	121	222	226
	SouthBP66	94	104	161	163	186	190	273	277	140	154	137	141	188	190	109	111	176	178	140	142	178	178	211	219	119	127	220	220
	SouthBP67	88	100	159	159	180	186	269	277	138	156	139	147	188	190	109	113	178	180	134	138	174	178	207	211	121	127	220	220
	SouthBP68	92	104	159	163	182	188	259	277	140	140	139	139	190	194	111	115	178	178	140	146	172	178	205	207	119	121	210	220
	SouthBP69	-9	-9	159	159	182	188	259	277	140	152	133	133	190	194	111	111	174	176	140	140	-9	-9	-9	-9	119	121	210	220
	SouthBP70	88	100	159	161	180	180	265	269	138	140	-9	-9	190	190	113	117	176	178	134	152	174	176	207	211	121	127	220	222
	SouthBP71	100	104	159	161	-9	-9	-9	-9	140	152	137	137	190	194	111	115	174	176	134	140	176	178	207	213	119	121	220	222
	SouthBP72	106	106	157	159	184	186	265	277	138	140	141	143	190	190	111	115	174	174	140	156	170	174	211	213	115	121	210	220
	SouthBP73	88	108	159	167	178	184	265	287	158	166	137	143	190	190	113	117	178	178	140	144	176	178	211	213	121	125	220	222
	SouthBP74	88	100	159	159	176	178	273	277	138	156	-9	-9	-9	-9	111	119	178	180	154	158	174	176	207	209	121	125	212	212
	SouthBP75	96	102	159	163	178	186	273	281	158	158	137	137	186	194	111	115	178	178	156	156	174	178	205	211	117	117	208	224
	SouthBP76	88	104	157	159	178	186	273	293	152	156	139	141	186	190	113	117	178	180	146	154	172	174	217	219	121	121	220	226
	SouthBP77	88	88	157	159	180	184	265	287	140	140	133	137	190	192	113	117	178	178	138	140	178	178	213	219	121	121	210	214
	SouthBP78	88	108	155	159	178	180	271	293	138	156	137	139	190	192	111	117	174	180	140	156	174	174	207	217	119	121	206	206
	SouthBP79	88	100	159	159	176	178	273	277	140	142	137	139	192	194	113	113	178	182	144	156	174	178	211	211	113	125	208	222
	SouthBP80	92	104	159	163	182	186	273	299	152	162	137	137	194	196	111	111	174	178	138	158	178	178	207	217	119	121	212	220
	SouthBP81	100	104	161	163	180	190	269	287	140	152	-9	-9	190	190	115	117	176	178	134	140	-9	-9	207	219	121	121	220	222
	SouthBP82	88	108	159	159	178	180	-9	-9	158	166	137	137	190	192	111	113	174	174	140	156	174	178	207	211	119	121	220	228
	SouthBP83	88	96	159	163	178	180	289	293	138	158	-9	-9	190	192	113	117	174	174	138	140	172	174	211	211	117	119	220	220
	SouthBP84	104	108	163	163	176	186	273	303	140	140	137	137	192	194	113	117	178	180	134	150	174	176	205	209	115	121	220	222
	SouthBP85	88	104	167	167	178	184	277	287	138	158	137	137	190	194	113	113	178	178	144	152	174	178	213	213	121	125	212	220
	SouthBP86	92	96	159	167	174	180	273	297	138	156	137	137	194	194	111	111	178	180	140	140	178	178	205	213	113	123	200	210
	SouthBP87	88	104	159	163	178	178	273	283	138	146	137	137	190	192	117	117	178	178	144	154	178	178	205	213	119	123	210	212
	SouthBP88	104	104	159	163	182	186	273	299	152	162	133	137	190	194	111	111	174	178	138	140	178	178	207	217	119	121	212	222
	SouthBP89	88	104	163	163	186	186	271	281	140	142	137	137	186	196	111	115	174	178	148	158	176	178	211	219	119	123	220	222
	SouthBP90	88	106	155	159	178	180	-9	-9	142	156	137	137	194	194	113	119	174	178	156	156	178	178	217	219	113	115	210	220
	SouthBP91	104	108	159	163	178	190	271	273	160	160	137	143	-9	-9	107	107	176	178	140	156	174	178	205	207	119	127	200	220
	SouthBP92	88	90	159	167	174	188	273	293	140	140	137	139	180	194	111	117	176	178	-9	-9	-9	-9	213	213	113	117	206	220
	SouthBP93	96	104	159	163	178	180	271	271	140	142	135	137	-9	-9	115	119	178	180	138	140	-9	-9	211	217	121	127	222	224
	SouthBP94	104	104	159	163	178	186	273	293	152	154	137	139	186	194	109	113	178	180	122	138	174	178	213	217	121	125	210	226
	SouthBP95	88	88	159	161	180	186	273	293	152	152	141	141	190	194	105	105	178	178	156	156	178	180	207	215	121	121	208	220
	SouthBP96	88	104	159	161	-9	-9	-9	-9	140	152	137	137	190	194	111	115	174	176	140	140	176	178	207	213	121	121	220	220
	SouthBP97	90	106	-9	-9	182	184	273	277	156	158	137	137	-9	-9	109	117	178	178	140	144	178	178	219	219	121	121	212	220
	SouthBP98	88	90	159	161	178	180	273	299	140	156	133	133	190	194	107	111	178	178	140	142	-9	-9	209	213	121	125	206	208
	SouthBP99	88	102	159	167	178	186	269	273	142	144	139	145	190	194	113	115	178	178	140	140	174	178	207	213	123	127	210	222
	SouthBP100	98	104	163	163	182	184	273	275	138	140	137	137	-9	-9	115	117	178	178	146	154	174	178	217	217	121	125	220	222
	SouthBP101	88	104	159	163	178	188	265	283	142	152	139	147	194	194	113	113	178	178	150	150	180	180	211	213	119	127	200	200
	SouthBP102	88	106	163	163	178	184	273	287	156	162	139	139	196	196	113	117	178	180	140	144	172	178	211	213	121	123	212	220
	SouthBP103	96	106	159	163	178	182	273	273	142	152	133	133	194	202	111	117	178	178	146	150	174	178	209	209	121	121	208	222
	SouthBP104	88	92	167	167	180	184	265	295	138	158	137	137	190	194	111	113	178	178	220	140	176	178	205	213	123	125	210	220
	SouthBP105	104	110	161	163	178	182	273	299	152	152	137	147	190	196	111	117	174	178	140	158	176	178	207	209	121	121	220	222
	SouthBP106	104	108	159	163	178	190	271	273	138	158	137	143	192	202	107	115	176	178	140	156	174	178	205	207	119	127	200	220
	SouthBP107	104	104	159	159	178	178	271	299	140	160	137	137	194	196	101	119	178	178	140	158	172	178	207	211	121	123	210	224
	SouthBP108	88	104	159	159	182	186	289	291	142	152	137	141	190	190	115	115	180	182	156	156	178	180	213	213	123	127	206	206
	SouthBP109	88	96	167	167	180	184	265	273	138	166	137	143	190	194	111	117	178	178	140	140	178	178	213	213	113	121	210	222
	SouthBP110	90	104	159	161	178	180	271	273	140	160	137	141	180	196	101	117	176	178	142	158	174	178	207	209	123	125	206	224
	SouthBP111	88	104	-9	-9	180	180	289	291	140	142	139	141	190	196	115	117	174	178	-9	-9	176	178	213	213	119	123	208	220
	SouthBP112	88	104	159	161	176	184	271	281	132	140	137	141	190	192	113	115	178	180	134	158	174	182	213	217	115	117	218	222
	SouthBP113	88	88	157	159	186	188	267	273	138	140	137	141	190	202	113	115	178	180	140	140	174	178	209	209	119	121	210	214
	SouthBP114	88	88	-9	-9	186	188	273	293	142	158	139	141	192	194	119	119	178	182	140	140	178	178	207	219	119	121	210	214
	SouthBP115	88	98	-9	-9	178	180	281	293	-9	-9	139	143	190	194	117	119	176	180	146	156	178	178	205	215	113	121	220	228
	SouthBP116	88	104	159	161	184	186	265	281	140	152	137	141	190	190	105	119	176	178	138	148	178	178	205	215	119	121	220	226
	SouthBP117	88	104	159	165	178	184	265	265	142	158	137	137	188	194	107	115	178	178	140	152	178	178	207	213	117	121	212	220
	SouthBP118	88	106	165	165	180	182	271	275	142	158	133	141	188	192	105	117	178	178	148	150	178	180	209	215	117	123	212	226
	SouthBP119	104	106	-9	-9	178	178	273	293	154	158	137	147	192	192	105	111	178	180	140	150	174	176	213	219	119	121	224	224
	SouthBP120	88	104	163	165	178	188	265	291	142	158	137	137	194	202	111	115	178	178	140	152	176	178	213	219	113	121	208	230
	SouthBP121	88	100	161	163	178	178	-9	-9	142	162	141	143	192	196	111	115	174	176	138	156	176	178	207	215	119	127	222	222
	SouthBP122	88	100	159	159	178	188	265	281	142	152	141	151	190	198	113	119	180	180	138	148	178	178	207	211	117	119	208	226
	SouthBP123	104	104	159	165	186	188	271	275	140	162	137	141	194	196	107	117	178	178	156	158	178	178	213	215	121	123	206	220
	SouthBP124	88	88	163	163	-9	-9	-9	-9	162	162	141	143	192	192	111	115	174	176	138	156	178	178	205	219	113	119	222	222
	SouthBP125	88	88	159	159	176	178	281	289	142	154	137	139	190	190	115	117	176	176	146	148	174	182	205	217	115	129	212	220
	SouthBP126	88	96	157	167	178	180	265	277	140	140	141	141	188	192	111	115	176	180	138	140	178	178	211	213	121	123	206	220
	SouthBP127	88	88	159	163	178	188	281	289	140	158	139	141	192	194	115	115	176	178	140	152	174	178	211	215	117	127	208	212
	SouthBP128	88	106	163	163	178	180	273	275	138	158	141	141	190	194	113	115	178	178	138	156	174	178	207	207	119	127	212	224
	SouthBP129	88	88	161	161	178	178	275	299	142	160	141	143	192	192	111	115	174	176	138	156	178	178	205	219	113	119	214	222
	SouthBP130	88	100	159	167	178	188	273	293	132	160	137	141	192	194	113	115	174	174	138	156	174	178	207	219	117	121	220	222
	SouthBP131	98	104	157	159	178	178	281	281	140	146	141	141	190	196	113	115	176	180	144	152	174	178	211	213	115	117	208	214
	SouthBP132	88	88	159	163	186	188	273	275	138	142	137	151	194	202	113	115	178	180	148	152	178	180	207	217	117	127	210	218
	SouthBP133	100	100	159	167	186	186	273	291	140	142	139	141	190	190	113	119	178	178	138	158	178	178	205	215	115	125	210	210
	SouthBP134	96	104	153	161	184	188	273	291	140	142	137	141	190	190	117	119	176	178	146	156	172	178	205	217	119	125	226	230
	SouthBP135	92	106	159	165	180	180	273	275	140	156	139	139	194	194	101	117	178	178	144	158	178	178	209	215	115	119	206	212
	SouthBP136	100	104	159	163	178	188	275	279	140	142	137	141	188	190	117	117	178	178	152	152	174	178	207	209	115	121	224	224
	SouthBP137	96	104	159	159	180	188	273	299	140	156	137	141	190	198	113	115	176	178	134	140	172	176	207	217	115	121	210	224
	SouthBP138	100	100	159	167	176	186	273	293	132	160	137	137	194	198	107	113	178	178	156	156	174	178	207	207	117	121	212	220
	SouthBP139	98	104	157	157	184	184	283	285	138	140	137	139	192	192	107	113	178	178	128	156	166	172	211	215	121	125	220	220
	SouthBP140	104	106	159	159	178	186	271	295	140	154	139	139	190	202	107	117	178	178	142	144	174	178	207	209	121	125	208	212
	SouthBP141	104	104	159	159	178	178	283	291	142	158	139	141	194	198	111	117	178	178	140	144	170	178	207	213	121	125	208	212
	SouthBP142	96	96	159	169	186	186	273	273	158	158	137	139	190	196	101	119	174	174	148	158	174	174	215	215	121	125	218	224
	SouthBP143	100	106	157	157	178	180	271	271	140	148	137	139	190	196	115	117	178	178	140	140	170	174	213	213	117	121	206	212
	SouthBP144	88	104	155	163	178	186	271	277	132	142	137	137	190	190	115	115	178	182	128	144	178	178	211	217	117	125	220	220
	SouthBP145	88	104	157	163	178	180	265	275	152	154	137	141	188	190	113	117	178	180	128	142	178	178	211	217	115	119	208	208
	SouthBP146	88	104	163	169	180	186	267	279	140	158	137	143	190	194	111	113	178	178	132	148	178	180	211	217	113	117	218	222
	SouthBP147	100	106	157	157	180	180	269	273	142	142	137	141	196	196	115	117	180	180	136	156	176	176	215	219	121	125	206	212
	SouthBP148	88	96	159	165	184	186	295	299	138	142	141	143	194	196	117	117	178	178	150	152	178	182	211	217	119	119	212	212
	SouthBP149	94	100	159	163	178	186	-9	-9	138	142	137	141	194	194	111	115	178	178	148	152	174	178	205	217	121	121	226	226
	SouthBP150	88	92	163	163	180	188	279	279	142	142	133	139	190	194	115	117	174	178	142	148	176	178	207	217	121	123	212	220
	SouthBP151	88	106	163	165	180	190	273	273	152	156	137	137	190	190	113	117	178	182	140	156	176	178	205	217	125	125	212	212
	SouthBP152	100	106	159	163	188	188	273	289	140	142	137	139	190	192	115	115	174	180	140	156	174	174	211	219	115	127	208	222
	SouthBP153	100	104	159	159	178	184	291	291	140	152	141	147	190	194	113	117	178	178	148	156	176	178	205	213	115	119	208	208
	SouthBP154	88	102	161	169	180	186	271	273	138	152	137	151	190	194	105	117	178	180	148	156	174	178	211	213	117	121	206	222
	SouthBP155	100	104	157	169	184	184	271	273	140	152	133	139	186	194	115	119	174	178	156	158	178	178	215	217	119	125	222	226
	SouthBP156	88	88	161	163	178	184	275	293	140	152	137	143	194	194	113	117	176	178	120	140	174	174	217	217	121	125	222	224
	SouthBP157	98	100	159	159	186	188	269	273	152	152	141	151	190	192	115	117	176	178	138	158	178	178	211	213	115	117	210	220
	SouthBP158	88	106	159	161	186	188	271	273	138	162	141	147	190	190	105	117	178	178	152	156	176	178	215	217	117	119	212	224
	SouthBP159	88	106	159	167	180	184	273	273	142	146	137	137	190	190	115	119	178	178	140	152	176	178	217	219	121	123	208	220
	SouthBP160	100	106	-9	-9	176	176	275	277	-9	-9	139	141	190	194	115	115	176	182	152	152	174	178	211	219	115	125	206	218
	SouthBP161	96	106	157	159	178	180	271	291	140	162	147	153	194	194	111	115	176	178	148	150	178	178	211	215	119	123	210	226
	SouthBP162	100	106	157	167	188	188	279	279	140	154	139	141	190	192	111	115	174	180	138	148	176	180	207	219	121	121	208	220
	SouthBP163	88	100	157	161	176	184	269	275	142	152	137	137	192	194	113	115	176	176	140	146	174	174	207	217	121	125	206	224
	SouthBP164	90	90	159	159	182	186	265	281	146	158	141	141	192	202	115	117	174	182	156	158	178	178	205	205	119	123	222	226
	SouthBP165	88	92	159	159	176	178	275	281	140	160	139	139	192	194	113	115	178	178	148	148	172	178	211	213	115	121	210	224
	SouthBP166	104	106	169	169	178	186	-9	-9	162	164	137	141	190	190	115	115	176	180	138	152	178	178	207	217	113	121	206	220
	SouthBP167	88	106	169	169	184	184	265	273	162	164	137	147	192	192	109	119	178	180	156	158	178	178	205	209	115	121	222	222
	SouthBP168	98	106	159	159	186	188	267	279	140	168	137	141	190	190	109	115	178	180	140	156	178	178	205	213	121	125	200	206
	SouthBP169	94	104	159	163	178	188	273	293	140	160	137	153	190	194	105	113	176	178	140	156	-9	-9	-9	-9	115	117	200	218
	SouthBP170	100	106	163	163	180	188	265	265	140	154	137	137	186	192	115	117	178	178	124	152	176	178	207	209	121	125	218	218
	SouthBP171	102	106	159	159	178	180	259	269	138	138	137	137	194	194	107	117	172	174	148	150	170	172	211	213	115	119	206	208
	SouthBP172	100	104	161	161	178	178	275	275	154	162	137	147	190	196	117	117	174	176	140	140	178	178	205	213	121	121	206	220
	SouthBP173	88	96	165	165	176	186	269	269	142	142	137	137	186	194	113	119	176	178	138	142	172	176	211	211	115	123	226	226
	SouthBP174	88	104	159	163	180	188	275	275	138	156	133	141	186	190	105	121	178	178	140	142	172	172	207	217	117	119	200	208
	SouthBP175	88	92	159	165	180	188	-9	-9	138	138	137	141	194	194	115	115	176	178	148	156	172	178	-9	-9	117	117	200	210
	SouthBP176	88	100	159	163	186	186	281	287	142	142	141	143	194	196	105	117	178	178	128	152	178	182	211	217	119	127	212	222
	SouthBP177	100	104	159	167	174	180	265	299	138	158	137	141	190	194	113	115	176	176	128	138	174	178	207	213	115	123	206	222
	SouthBP178	88	100	159	163	176	180	285	287	138	158	139	141	188	192	113	113	176	178	140	158	172	178	209	211	115	115	206	208
	SouthBP179	88	102	157	159	178	180	265	269	138	138	137	141	190	194	107	119	178	178	142	148	172	178	211	213	119	123	200	212
	SouthBP180	88	104	163	163	186	186	269	279	162	166	137	147	190	194	115	117	176	178	138	156	178	178	211	213	119	121	206	206
	SouthBP181	88	104	161	167	184	184	279	283	146	156	139	141	194	196	111	117	176	178	142	148	178	178	209	213	119	121	212	226
	SouthBP182	100	104	159	163	184	186	279	289	138	142	139	141	194	194	115	115	176	180	138	140	178	180	213	215	115	121	222	226
	SouthBP183	88	106	159	159	178	180	285	297	146	156	137	141	190	194	115	115	176	176	158	158	176	178	211	211	115	115	220	220
	SouthBP184	100	104	159	167	178	186	269	279	142	158	133	139	194	198	111	111	176	178	136	138	178	178	213	219	117	119	-9	-9
	SouthBP185	88	88	159	163	180	180	269	269	146	158	141	141	194	194	115	115	176	180	148	158	166	178	209	211	115	119	220	220
	SouthBP186	96	100	163	163	178	188	279	285	152	158	139	141	190	192	115	117	174	178	148	148	166	178	213	213	119	123	224	224
	SouthBP187	100	104	159	159	178	186	287	295	140	162	137	137	190	196	115	115	174	178	140	158	178	178	205	213	123	123	220	224
	SouthBP188	104	104	159	167	186	188	271	281	140	140	137	141	192	194	115	117	176	178	142	148	172	178	213	217	121	123	208	220
	SouthBP189	104	104	163	167	184	188	267	285	154	154	137	137	190	194	113	115	178	178	140	148	166	166	207	213	115	121	208	208
	SouthBP190	94	104	163	163	178	188	273	279	132	138	137	141	190	196	111	117	174	178	148	148	166	178	211	213	123	123	224	224
	SouthBP191	98	100	163	163	180	184	273	279	140	156	137	139	180	186	105	117	174	176	138	158	176	176	213	213	115	117	206	208
	SouthBP192	100	100	161	163	182	184	269	271	158	162	137	141	194	194	115	119	172	176	134	148	-9	-9	211	213	115	117	-9	-9
	SouthBP193	100	100	159	167	178	186	269	273	144	146	137	141	194	194	113	115	178	178	138	158	178	178	207	211	115	121	220	222
	SouthBP194	88	106	159	167	180	182	275	275	142	146	137	141	194	194	115	117	178	178	132	154	166	172	205	219	115	121	206	212
	SouthBP195	88	106	159	163	180	184	273	273	140	160	135	147	194	194	111	115	178	180	138	140	174	178	209	217	119	121	220	222
	SouthBP196	90	104	159	161	178	188	279	295	138	162	139	139	190	196	113	117	180	180	140	148	172	174	211	213	123	125	210	210
	SouthBP197	100	106	159	159	178	188	265	275	140	156	137	141	188	190	113	115	178	178	140	140	178	180	205	213	115	115	222	222
	SouthBP198	100	106	159	167	184	188	269	275	138	158	141	143	190	196	115	117	174	176	140	140	178	178	211	217	115	117	222	222
	SouthBP199	88	88	159	161	178	188	281	291	142	156	141	143	190	194	117	119	178	180	138	148	174	178	211	213	117	121	206	208
	SouthBP200	88	94	159	159	176	178	295	295	142	146	137	139	190	194	115	117	178	178	140	156	174	176	211	211	117	123	210	220
	SouthBP201	94	104	163	167	178	186	273	279	152	158	139	141	190	192	111	117	174	182	148	148	166	174	211	213	123	123	218	224
	SouthBP202	96	100	159	159	178	178	269	295	140	142	137	137	194	194	111	113	178	178	142	150	172	174	211	213	115	121	206	208
	SouthBP203	94	106	159	163	176	178	273	285	132	152	141	145	192	194	113	115	178	178	140	148	166	176	207	213	119	123	206	224
	SouthBP204	94	106	159	163	176	178	273	285	132	152	137	141	192	196	111	115	178	178	140	148	166	176	207	213	119	123	206	224
	SouthBP205	88	100	161	161	176	178	271	275	142	144	139	141	192	192	117	117	176	178	126	156	178	178	211	213	121	127	206	220
	SouthBP206	100	104	159	163	174	188	269	293	140	142	139	141	194	194	111	111	176	178	136	150	172	178	207	213	121	125	212	222
	SouthBP207	92	106	161	161	184	186	-9	-9	138	140	-9	-9	194	194	115	117	178	178	140	142	180	182	205	217	115	129	212	220
	SouthBP208	88	108	159	167	178	184	273	279	142	142	137	141	194	192	111	113	178	178	138	138	176	180	213	213	115	125	208	220
	SouthBP209	100	104	161	163	174	178	273	273	142	156	143	143	194	194	115	117	176	176	152	160	178	178	209	211	121	125	206	212
	SouthBP210	88	104	159	161	178	178	-9	-9	140	164	143	153	190	194	117	119	172	176	138	144	178	178	211	211	121	123	206	222
	SouthBP211	100	104	159	161	178	184	273	285	154	162	137	137	194	194	109	115	176	178	148	158	172	178	211	213	117	119	208	228
	SouthBP212	88	100	159	163	180	186	285	299	162	162	137	137	194	194	113	117	174	178	148	148	176	178	211	213	119	121	220	220
	SouthBP213	88	88	161	167	178	186	273	295	152	156	-9	-9	190	194	115	117	176	178	140	150	178	178	207	211	119	123	212	220
	SouthBP214	88	96	159	167	180	186	269	281	-9	-9	137	141	190	194	107	115	178	178	140	158	178	178	213	215	119	119	208	220
	SouthBP215	88	104	163	163	184	186	271	287	140	140	141	141	190	194	113	115	178	178	140	150	166	178	205	217	117	119	208	212
	SouthBP216	88	104	159	161	174	184	269	273	138	154	137	141	194	194	113	115	180	180	140	158	178	178	213	213	119	121	226	228
	SouthBP217	88	100	161	163	178	184	269	291	140	152	141	151	194	194	109	115	176	178	142	148	172	174	211	211	117	123	208	220
	SouthBP218	98	100	159	159	178	186	269	285	152	154	137	137	196	196	113	115	174	176	140	140	178	178	213	213	117	125	208	208
	SouthBP219	88	104	163	167	176	180	269	279	140	162	137	139	194	194	115	115	178	180	122	158	176	178	211	213	117	117	218	226
	SouthBP220	100	104	159	161	188	188	265	273	140	158	139	139	190	194	115	115	176	176	142	152	166	174	211	211	119	121	206	206
	SouthBP221	88	96	159	159	180	184	269	273	154	158	-9	-9	190	190	115	117	172	178	138	138	178	178	209	215	119	121	208	220
	SouthBP222	88	98	159	163	178	180	279	289	140	156	133	141	194	194	115	115	174	178	140	142	172	176	205	211	121	121	220	222
	SouthBP223	106	106	161	167	176	184	287	287	142	144	135	151	194	194	115	115	176	180	140	140	176	178	213	215	119	123	206	220
	SouthBP224	88	88	159	161	180	188	269	285	140	140	137	151	-9	-9	105	117	180	180	140	142	174	180	205	211	121	123	208	208
	SouthBP225	92	108	159	163	184	184	273	283	144	162	135	139	194	194	115	119	174	180	138	140	178	178	209	213	119	125	222	226
	SouthBP226	88	106	159	169	186	186	273	291	140	142	137	141	194	194	111	117	174	178	156	156	178	178	211	211	113	121	206	208
	SouthBP227	88	96	163	165	180	184	267	299	158	162	137	145	194	194	113	117	176	178	142	158	178	178	213	213	119	121	218	220
	SouthBP228	100	104	159	163	178	188	-9	-9	138	140	137	137	194	194	109	113	174	176	140	148	172	176	-9	-9	117	121	208	220
	SouthBP229	96	104	159	167	188	188	291	291	152	154	137	145	194	194	105	113	176	178	156	158	178	178	211	213	117	119	218	218
	SouthBP230	100	106	159	161	180	188	269	273	138	142	-9	-9	186	194	117	119	174	176	140	158	174	178	209	213	117	119	222	226
	SouthBP231	100	106	159	159	188	188	-9	-9	-9	-9	137	137	188	194	117	119	174	176	140	158	174	178	209	213	117	119	222	226
	SouthBP232	92	108	-9	-9	174	184	273	283	-9	-9	135	139	190	194	115	119	174	180	140	140	178	178	209	213	119	125	222	226
	SouthBP233	100	104	159	159	188	188	265	279	142	154	137	139	194	196	113	115	174	174	140	156	174	178	211	213	123	125	208	226
	SouthBP234	88	104	163	163	178	182	273	281	138	156	137	141	196	196	113	115	176	178	138	140	178	178	205	211	119	121	210	210
	SouthBP235	88	104	163	165	178	182	273	281	138	158	137	141	194	194	113	115	176	178	138	140	178	178	205	211	119	121	210	210
	SouthBP236	88	110	163	163	178	186	273	293	158	158	139	141	-9	-9	115	117	176	178	156	158	178	178	213	213	119	121	-9	-9
	SouthBP237	98	104	159	163	180	180	269	273	140	142	135	135	194	194	115	117	178	182	154	158	166	178	213	213	121	129	208	208
	SouthBP238	88	106	157	159	182	186	275	283	140	150	137	141	192	194	111	117	178	178	146	158	172	178	209	217	123	123	206	226
	SouthBP239	90	104	159	159	178	188	269	281	144	162	133	133	188	188	107	113	178	178	148	148	172	178	213	219	117	125	208	220
	SouthBP240	88	104	159	161	184	188	273	273	140	152	137	141	194	194	109	109	176	180	138	158	176	178	213	217	121	123	206	226
	SouthBP241	98	104	159	165	178	180	289	293	142	142	147	147	190	192	109	113	176	178	148	158	172	178	213	219	119	123	208	212
	SouthBP242	94	94	159	159	180	184	287	291	140	142	137	143	194	194	107	115	178	182	148	158	166	180	207	213	113	119	220	220
	SouthBP243	96	104	159	167	178	180	269	273	140	152	137	137	194	194	111	115	178	178	140	148	172	178	211	213	113	125	220	220
	SouthBP244	104	104	157	167	180	188	265	273	132	138	139	141	192	194	115	115	180	182	148	156	166	174	209	213	117	123	212	226
	SouthBP245	88	100	159	167	178	186	269	279	140	162	137	151	194	194	115	115	172	180	138	142	174	178	205	213	113	123	208	208
	SouthBP246	104	104	159	159	180	188	265	273	142	148	139	141	190	194	115	117	178	180	138	152	174	174	213	213	117	125	200	212
	SouthBP247	88	98	157	161	184	184	279	285	156	162	133	137	194	194	115	127	176	178	138	138	176	176	217	217	115	117	206	208
	SouthBP248	104	104	167	167	-9	-9	279	285	156	158	137	141	186	194	117	117	178	180	158	158	174	178	213	217	121	123	212	222
	SouthBP249	88	100	163	167	178	186	275	275	142	142	145	147	190	194	113	115	176	178	132	138	174	176	213	217	115	119	224	226
	SouthBP250	88	100	161	161	178	186	273	295	132	158	135	137	190	190	115	115	178	178	150	150	174	180	215	217	117	121	220	220
	SouthBP251	88	100	163	167	178	186	275	283	144	144	143	147	-9	-9	113	115	176	178	132	138	172	174	217	217	115	119	224	226
	SouthBP252	88	98	157	163	178	180	279	285	156	162	133	137	196	196	115	117	176	178	140	140	-9	-9	217	217	115	127	206	208
	SouthBP253	88	104	163	163	178	186	269	285	142	148	137	141	190	194	115	117	176	178	148	148	172	182	209	209	121	123	200	206
	SouthBP254	98	104	163	163	182	182	269	275	140	142	137	141	194	194	113	115	178	180	148	154	174	178	209	215	121	129	200	208
	SouthBP255	88	104	159	163	180	186	271	279	132	140	137	141	190	194	115	117	178	178	148	148	176	184	209	209	121	123	200	206
	SouthBP256	88	98	159	167	182	190	269	287	142	156	137	141	190	194	105	117	178	180	136	154	178	178	213	213	115	117	206	222
	SouthBP257	94	94	161	167	180	186	273	289	140	142	139	141	190	194	113	117	178	180	120	138	174	176	217	217	117	119	220	220
	SouthBP258	94	104	159	167	178	180	269	271	142	154	137	137	194	194	107	119	176	178	140	154	178	178	213	217	113	121	200	228
	SouthBP259	88	104	163	163	180	180	269	275	140	142	137	141	196	196	115	115	178	178	138	154	174	178	209	215	121	129	200	208
	SouthBP260	88	104	159	163	178	180	269	293	140	156	137	137	194	194	113	115	180	180	148	154	174	178	213	215	123	130	206	208
	SouthBP261	90	104	159	163	178	178	273	279	142	158	137	141	190	194	115	117	176	178	148	158	176	178	209	211	119	121	206	224
	SouthBP262	88	104	165	165	178	186	269	273	140	142	137	141	190	194	115	117	178	178	-9	-9	-9	-9	-9	-9	121	123	206	206
	SouthBP263	92	104	159	163	180	188	267	279	132	140	133	139	190	192	113	117	176	178	140	144	178	180	-9	-9	121	123	206	226
	SouthBP264	88	100	159	163	184	184	273	275	158	160	141	141	190	190	115	117	176	178	150	150	174	176	217	217	117	121	206	208
	SouthBP265	104	104	165	165	178	188	269	273	140	142	137	137	190	194	107	117	176	178	140	148	172	178	207	217	121	123	220	228
	SouthBP266	96	104	159	163	180	190	265	279	140	158	141	141	190	194	113	115	178	180	148	158	178	178	211	213	119	129	208	224
	SouthBP267	88	92	161	167	180	186	273	289	140	142	139	141	190	194	113	117	180	180	120	138	174	176	217	217	117	119	220	220
	SouthBP268	104	104	161	167	180	180	281	293	146	162	137	139	190	194	113	117	178	182	140	154	174	178	213	213	119	125	212	212
	SouthBP269	88	104	159	167	180	186	273	279	142	158	137	153	186	192	117	117	180	180	-9	-9	178	178	-9	-9	121	123	206	204
	SouthBP270	88	88	159	167	180	186	259	259	142	160	147	147	186	194	117	117	172	176	144	158	174	178	207	213	121	123	208	222
	SouthBP271	88	104	159	163	178	178	285	293	140	142	137	141	194	194	113	115	178	180	148	154	174	178	207	207	121	129	200	208
	SouthBP272	104	108	157	159	178	180	273	273	154	154	137	137	190	194	113	115	176	178	148	150	178	180	-9	-9	113	123	206	210
	SouthBP273	104	104	159	167	178	180	265	293	144	164	141	153	190	194	115	117	178	178	140	150	172	178	207	217	113	121	208	210
	SouthBP274	88	104	159	163	178	180	285	285	140	142	137	141	194	194	113	123	172	180	136	154	174	174	209	215	115	115	208	208
	SouthBP275	88	104	159	159	178	186	265	267	140	164	141	153	190	194	113	115	172	178	140	148	172	178	207	213	117	121	208	226
	SouthBP276	88	88	159	167	176	178	293	293	138	142	137	143	192	192	115	115	178	178	132	144	172	178	213	217	119	123	226	226
	SouthBP277	88	104	159	167	178	184	273	273	132	138	143	147	190	194	105	115	178	178	140	142	174	178	-9	-9	117	121	198	206
	SouthBP278	94	108	155	167	188	188	273	285	138	140	139	139	192	194	113	117	178	180	156	158	178	180	211	213	127	127	224	224
	SouthBP279	88	98	163	167	184	188	269	291	158	164	139	141	190	194	113	115	174	178	154	156	178	180	209	213	119	125	212	226
	SouthBP280	88	88	157	159	180	186	273	273	154	154	147	147	190	194	117	117	172	176	144	158	174	178	-9	-9	121	123	208	208
	SouthBP281	104	104	167	167	184	186	265	269	156	162	141	143	190	194	115	117	172	178	154	154	172	180	209	213	123	125	214	226
	SouthBP282	88	94	161	163	176	180	265	289	140	154	137	139	194	194	113	115	180	180	120	148	174	176	213	217	113	119	208	220
	SouthBP283	98	104	163	167	180	184	269	293	162	162	141	151	190	190	113	115	174	178	140	154	178	180	207	209	113	125	210	226
	SouthBP284	88	104	163	167	186	188	265	279	140	142	141	151	186	192	115	117	178	180	158	158	176	178	207	215	117	123	206	206
	SouthBP285	88	104	159	167	180	186	273	279	142	156	137	151	186	192	117	117	180	180	158	158	178	178	215	217	121	123	206	206
	SouthBP286	88	104	163	167	176	178	265	269	140	154	137	151	194	194	113	115	178	180	148	148	174	174	207	213	113	123	208	208
	SouthBP287	104	108	159	167	-9	-9	265	293	162	162	-9	-9	190	194	115	117	174	176	140	158	178	180	207	213	113	117	216	226
	SouthBP288	88	88	159	163	178	178	293	293	142	154	137	143	192	194	115	115	178	180	132	154	174	178	213	217	119	129	206	226
	SouthBP289	104	108	159	159	180	180	269	273	152	152	137	137	190	194	113	115	176	178	146	148	178	180	209	213	113	123	206	210
	SouthBP290	104	104	163	167	176	178	265	267	140	154	141	153	190	194	115	115	176	178	148	158	174	174	207	211	113	119	206	208
	SouthBP291	88	104	161	163	176	184	279	279	142	158	135	137	190	194	115	117	174	180	138	156	172	176	213	213	119	123	226	226
	SouthBP292	88	100	163	163	178	180	269	293	142	154	141	143	192	194	115	115	178	180	132	140	178	180	205	217	119	129	208	226
	SouthBP293	104	104	159	163	180	188	269	269	138	154	139	141	194	194	105	107	178	180	140	140	176	180	205	213	115	119	222	222
	SouthBP294	94	104	159	167	186	188	259	273	140	152	139	141	190	190	105	115	178	180	-9	-9	-9	-9	207	215	113	121	220	222
	SouthBP295	104	108	161	163	178	180	293	293	138	160	137	147	190	194	113	115	178	180	154	156	178	178	211	213	119	129	208	210
	SouthBP296	104	106	159	159	178	188	273	289	152	156	139	141	190	194	115	115	172	178	146	154	178	180	211	213	121	121	206	220
	SouthBP297	88	98	165	165	186	186	259	291	152	158	137	147	186	194	115	117	172	180	138	158	174	178	211	213	115	121	222	230
	SouthBP298	88	108	163	167	180	180	265	269	140	152	137	141	190	194	113	113	172	184	138	148	178	180	209	217	117	121	222	222
	SouthBP299	88	104	159	167	178	184	285	285	142	162	133	145	194	194	113	115	178	178	132	142	172	176	213	213	115	119	226	226
	SouthBP300	104	108	159	167	178	186	265	269	156	162	141	143	194	194	113	117	172	176	154	154	178	178	213	213	-9	-9	214	216
	SouthBP301	98	104	163	167	180	184	269	293	164	164	141	153	190	190	113	115	174	178	140	154	178	180	207	209	113	125	210	226
	SouthBP302	88	108	159	161	176	178	291	297	158	162	133	137	190	194	115	117	174	178	140	156	172	180	211	213	115	119	222	226
	SouthBP303	88	104	159	159	180	184	269	269	132	140	137	147	190	194	115	117	178	178	140	148	178	180	209	213	121	125	220	230
	SouthBP304	100	104	159	167	182	188	269	273	142	156	141	151	194	194	107	115	178	178	128	148	172	178	205	209	121	123	220	220
	SouthBP305	88	104	159	159	174	174	269	273	138	152	137	137	186	190	113	119	176	184	146	148	178	182	213	217	121	123	226	226
	SouthBP306	100	100	159	159	178	188	273	291	152	156	139	151	190	194	115	115	172	176	140	142	166	178	211	213	117	117	206	222
	SouthBP307	104	108	159	167	178	180	271	287	140	156	139	141	186	192	115	117	178	180	140	140	180	180	211	213	115	123	212	214
	SouthBP308	94	100	163	163	176	180	269	283	142	158	137	141	194	194	113	115	178	180	140	140	178	180	205	213	117	119	208	208
	SouthBP309	88	106	159	163	180	186	259	273	142	152	143	147	190	194	115	117	178	178	144	146	166	178	207	215	119	121	208	220
	SouthBP310	88	104	159	161	180	184	269	273	132	144	137	137	194	194	113	115	174	178	142	148	176	178	207	207	121	123	208	226
	SouthBP311	88	104	161	163	180	184	269	283	132	144	137	139	192	194	115	115	178	178	142	148	176	178	207	209	121	123	208	226
	SouthBP312	94	94	159	163	180	180	273	287	142	158	139	141	190	192	113	117	178	180	120	138	174	176	217	217	115	117	220	220
	SouthBP313	88	104	159	167	188	188	273	279	140	160	139	141	190	194	113	119	178	184	122	140	178	180	211	211	121	127	220	220
	SouthBP314	88	104	159	165	174	182	273	273	140	142	141	141	194	194	107	107	178	178	140	156	172	178	209	217	113	121	208	208
	SouthBP315	96	104	161	163	188	188	263	279	138	140	133	147	190	190	113	117	178	180	148	148	178	180	213	213	115	123	222	226
	SouthBP316	88	104	159	167	188	188	273	279	140	142	139	141	190	194	113	119	178	182	122	140	178	180	211	211	121	127	214	220
	SouthBP317	104	104	159	165	180	184	273	273	142	158	133	133	186	190	113	115	174	178	148	156	174	176	209	211	121	123	218	226
	SouthBP318	94	104	159	167	180	188	265	273	142	142	141	141	190	194	113	117	180	180	138	152	174	174	213	217	117	117	220	220
	SouthBP319	104	104	161	163	176	178	273	279	152	156	137	141	190	194	115	115	174	178	132	142	172	182	213	213	117	121	208	208
	SouthBP320	88	96	159	159	174	174	269	273	142	154	141	141	194	194	105	107	178	180	140	156	178	178	209	217	113	123	208	208
	SouthBP321	88	104	159	167	178	180	273	281	-9	-9	137	139	192	194	115	117	178	180	140	140	178	178	211	211	115	125	222	222
	SouthBP322	88	104	159	161	178	182	273	275	142	158	137	141	192	194	115	115	172	176	138	138	178	178	207	213	113	115	206	206
	SouthBP323	104	104	159	167	-9	-9	265	293	146	146	141	153	190	194	115	117	178	178	140	148	172	178	207	217	113	121	206	208
	SouthBP324	88	104	159	167	180	184	269	269	140	140	135	137	190	194	117	117	176	176	138	142	178	178	211	211	119	125	220	220
	SouthBP325	100	104	155	167	178	182	269	273	138	162	137	137	190	192	115	119	176	178	140	150	176	178	207	213	119	125	220	220
	SouthBP326	98	104	159	163	184	186	273	287	138	158	141	147	190	198	107	113	178	178	140	154	178	178	205	215	117	119	208	208
	SouthBP327	90	98	161	161	176	178	265	269	140	152	133	137	194	194	115	117	176	178	142	148	178	180	207	213	121	121	214	214
	SouthBP328	104	104	159	163	180	180	293	295	156	162	137	139	190	194	113	115	178	180	148	154	174	178	213	213	125	129	206	210
	SouthBP329	88	88	159	159	180	184	279	279	142	152	133	141	194	194	115	117	176	180	140	158	178	178	211	213	121	123	218	218
	SouthBP330	88	96	159	167	178	188	273	283	142	146	137	137	190	194	107	119	178	180	146	158	178	178	213	215	113	115	226	228
	SouthBP331	98	104	159	163	188	188	269	273	140	142	137	141	190	194	113	115	174	178	140	156	172	178	211	213	117	121	220	222
	SouthBP332	108	108	159	167	174	178	273	283	140	142	137	139	194	196	113	119	178	178	140	146	178	178	213	213	115	121	210	222
	SouthBP333	88	108	159	161	178	182	283	287	138	156	137	141	190	196	113	115	176	178	140	140	174	180	211	213	127	129	220	226
	SouthBP334	88	92	159	165	178	188	259	259	142	152	133	137	190	192	115	117	174	180	144	156	178	178	209	213	119	125	208	222
	SouthBP335	104	106	159	161	178	186	269	273	154	162	137	141	194	194	113	115	180	180	148	158	172	178	213	213	115	119	206	218
	SouthBP336	104	106	159	161	178	184	273	273	154	162	137	141	194	194	115	115	180	180	150	150	172	178	209	213	119	119	208	218
	SouthBP337	88	92	155	159	178	190	271	273	142	144	137	141	192	194	113	117	178	178	140	140	172	174	213	217	-9	-9	222	228
	SouthBP338	100	104	159	165	180	188	263	271	138	142	137	137	190	194	113	117	174	176	148	150	166	180	211	213	113	125	208	228
	SouthBP339	88	92	155	163	178	184	271	273	142	144	137	141	192	194	113	117	178	178	126	140	172	174	213	217	121	127	222	228
	SouthBP340	88	96	159	167	178	186	273	273	140	142	137	141	194	194	113	117	178	180	148	158	178	178	213	213	119	121	220	220
	SouthBP341	88	92	155	163	178	178	273	279	142	144	137	141	190	192	115	117	178	178	140	140	172	174	213	217	121	127	222	228
	SouthBP342	92	108	161	163	178	178	273	279	144	166	137	141	190	192	101	117	176	178	140	140	172	174	205	217	121	127	208	228
	SouthBP343	-9	-9	161	163	178	178	273	273	138	144	137	141	190	192	101	103	176	178	140	140	-9	-9	205	217	121	121	208	228
	SouthBP344	88	98	157	159	188	188	269	271	140	152	137	137	194	194	113	115	176	178	140	156	172	180	211	211	117	125	222	228
	SouthBP345	104	104	155	161	174	188	273	287	152	156	137	139	190	196	113	115	174	176	140	158	178	180	209	211	119	123	210	230
	SouthBP346	104	108	159	161	178	178	273	273	142	142	133	137	192	194	107	107	178	180	140	146	172	176	205	209	-9	-9	-9	-9
	SouthBP347	92	104	155	167	178	188	271	273	138	142	137	141	192	194	115	117	178	178	140	140	172	174	207	213	121	127	208	228
	SouthBP348	104	104	159	167	180	182	267	279	156	160	137	137	190	194	115	119	178	180	152	158	178	180	209	215	115	121	212	222
	SouthBP349	88	104	161	163	178	188	269	291	140	142	133	137	190	194	107	113	178	178	140	140	172	178	209	211	115	117	208	222
	SouthBP350	88	100	161	163	176	180	265	273	156	156	137	143	194	194	105	117	174	180	140	158	172	178	211	217	121	125	208	220
	SouthBP351	106	106	159	167	184	186	269	273	142	154	137	141	194	194	115	115	174	180	154	158	172	178	213	213	119	119	208	218
	SouthBP352	88	100	161	163	178	184	273	273	158	158	137	143	194	194	105	117	174	180	140	140	172	178	211	217	121	125	208	220
	SouthBP353	98	108	157	161	178	188	269	273	158	158	133	137	194	198	115	115	176	178	140	140	174	178	211	213	119	127	206	208
	SouthBP354	104	104	159	161	178	180	267	279	160	162	137	141	186	194	101	115	176	180	140	158	178	180	211	213	117	121	208	208
	SouthBP355	88	108	159	163	178	186	271	279	152	166	137	137	190	190	107	115	176	176	128	140	172	174	217	217	121	127	218	228
	SouthBP356	88	104	161	163	178	178	273	273	140	142	137	137	192	194	113	117	178	178	140	158	174	178	211	217	127	127	206	228
	SouthBP357	88	100	161	163	178	186	273	283	156	162	133	141	190	194	117	117	178	182	138	152	178	180	213	213	125	127	224	226
	SouthBP358	104	104	161	161	178	178	273	289	140	162	133	141	194	194	115	117	176	180	140	158	178	178	211	213	121	123	218	218
	SouthBP359	88	104	165	167	180	188	273	273	162	170	137	137	190	194	113	115	172	178	148	154	178	178	209	213	113	119	220	222
	SouthBP360	94	98	159	163	178	184	267	289	152	156	139	141	190	194	115	117	172	178	158	158	-9	-9	205	217	115	117	212	212
	SouthBP361	88	96	159	167	180	188	269	269	140	156	137	141	186	194	115	115	176	180	158	158	172	180	211	213	117	119	212	220
	SouthBP362	104	106	157	159	176	180	273	283	138	138	141	147	192	194	115	117	178	178	154	154	180	180	209	213	119	127	218	222
	SouthBP363	88	104	159	167	180	182	267	279	142	160	137	139	190	194	115	119	178	180	146	158	180	180	209	215	115	121	222	222
	SouthBP364	88	88	161	167	178	186	273	279	162	162	139	141	194	194	113	117	174	176	146	148	170	178	217	217	119	125	206	208
	SouthBP365	88	104	159	167	180	180	273	285	142	156	137	141	190	194	113	117	174	178	138	148	178	178	209	213	117	119	208	218
	SouthBP366	88	88	157	157	180	186	-9	-9	140	142	137	141	-9	-9	113	115	172	178	140	140	176	178	211	213	119	121	220	220
	SouthBP367	100	106	163	167	178	184	267	273	154	156	137	137	188	192	111	113	174	178	142	156	174	178	215	217	123	125	218	220
	SouthBP368	92	108	159	165	178	186	273	285	154	170	139	141	188	190	105	115	176	178	140	144	178	178	209	215	123	127	206	206
	SouthBP369	98	106	163	163	178	188	295	295	-9	-9	137	141	194	194	111	117	178	178	140	142	174	178	211	217	123	123	220	220
	SouthBP370	88	104	159	161	186	188	267	273	168	168	137	141	190	194	113	117	178	180	140	154	176	180	209	211	123	123	206	220
	SouthBP371	88	106	159	167	178	180	281	289	138	154	137	141	186	194	107	117	174	178	124	138	178	178	209	219	117	119	222	214
	SouthBP372	88	108	159	167	178	180	285	287	-9	-9	139	141	190	192	115	117	176	176	156	156	-9	-9	215	217	121	127	208	224
	SouthBP373	88	88	161	161	186	188	271	283	138	140	133	137	180	192	105	115	178	180	140	154	178	180	209	211	119	123	208	224
	SouthBP374	96	106	163	167	180	186	265	283	140	140	133	139	192	194	111	113	176	182	128	150	178	180	217	217	119	127	208	212
	SouthBP375	88	88	161	165	178	182	265	293	-9	-9	139	143	194	194	115	117	178	178	138	146	174	178	217	219	113	129	222	226
	SouthBP376	88	108	167	167	180	186	279	295	-9	-9	133	137	186	194	105	105	174	178	150	158	174	178	211	213	121	123	222	222
	SouthBP377	102	104	159	167	176	180	273	291	-9	-9	139	143	190	194	115	115	174	178	140	140	174	174	207	213	121	123	206	208
	SouthBP378	88	88	159	167	186	186	275	285	-9	-9	137	139	190	194	113	115	176	178	142	154	178	178	213	213	115	123	206	208
	SouthBP379	88	88	159	159	180	186	271	273	142	158	141	141	194	198	113	115	172	172	140	140	-9	-9	211	213	119	121	220	220
	SouthBP380	88	98	165	165	180	188	-9	-9	170	170	137	137	194	194	111	115	174	180	148	152	178	178	213	213	119	119	224	224
	SouthBP381	100	104	157	167	176	188	275	279	160	170	137	141	190	190	115	119	176	178	140	140	-9	-9	211	211	121	123	206	218
	SouthBP382	96	106	159	167	178	186	273	279	-9	-9	139	141	190	192	113	117	176	178	140	140	174	178	209	213	121	127	208	220
	SouthBP383	106	108	159	167	176	182	273	273	138	142	137	137	186	194	117	117	174	178	140	146	176	180	209	219	121	123	224	224
	SouthBP384	98	108	159	167	178	180	269	271	154	164	139	141	194	194	109	117	174	178	138	140	178	178	209	209	119	119	210	222
	SouthBP385	100	108	161	167	174	188	279	283	148	162	139	139	190	190	117	119	174	178	138	140	174	178	209	215	125	130	212	220
	SouthBP386	86	106	159	161	178	188	273	293	142	142	137	139	192	194	107	107	178	178	128	144	176	180	205	217	121	125	212	220
	SouthBP387	92	104	159	159	178	186	273	279	154	158	137	141	194	194	111	113	174	176	140	142	178	178	211	219	121	123	212	218
	SouthBP388	100	108	157	167	180	188	271	279	170	170	137	139	190	194	117	117	178	178	140	140	178	180	205	213	121	129	206	218
	SouthBP389	88	96	159	159	178	180	273	285	156	170	139	141	194	198	117	117	176	178	140	148	172	174	205	211	115	119	206	216
	SouthBP390	88	100	159	159	186	186	271	281	146	156	137	141	188	192	115	117	176	180	138	140	178	178	209	217	119	125	208	212
	SouthBP391	88	88	163	165	178	188	273	285	146	156	137	141	190	190	105	117	174	176	138	140	176	178	209	215	121	127	208	224
	SouthBP392	88	106	159	159	182	186	263	271	142	152	137	139	190	194	113	115	178	184	142	144	178	178	207	215	121	125	206	208
	SouthBP393	88	104	163	163	178	186	285	289	138	146	137	139	186	194	115	115	176	180	124	156	174	178	207	213	123	125	206	212
	SouthBP394	88	88	159	159	178	180	273	293	158	166	139	141	186	190	115	115	176	180	140	140	174	178	211	213	117	121	220	228
	SouthBP395	100	108	161	163	178	178	277	287	140	164	137	147	190	194	101	107	176	178	140	158	178	178	213	215	119	125	220	220
	SouthBP396	100	104	159	165	176	182	263	279	140	142	137	141	190	192	111	117	174	178	148	150	176	182	213	213	119	121	218	218
	SouthBP397	96	104	161	167	186	186	281	299	146	152	137	145	190	194	115	117	174	178	140	152	178	178	209	211	115	115	200	206
	SouthBP398	88	100	159	159	174	178	269	295	156	158	137	139	186	194	107	117	178	180	140	144	178	182	211	217	117	123	222	228
	SouthBP399	106	108	157	159	182	186	273	277	154	158	133	141	186	194	105	117	178	180	140	148	178	178	211	213	119	127	211	211
	SouthBP400	100	106	159	167	174	182	265	295	156	162	137	139	186	186	105	107	174	180	140	140	178	182	217	217	121	123	226	228
	SouthBP401	88	88	159	163	178	186	273	281	140	156	137	141	190	194	115	117	168	176	138	148	174	176	209	209	121	121	208	212
	SouthBP402	96	104	157	159	178	186	265	273	156	166	139	139	186	194	107	113	174	174	142	158	178	182	205	211	121	121	200	218
	SouthBP403	88	92	159	163	178	178	273	273	156	158	137	141	190	194	105	113	174	176	140	140	178	178	209	219	121	123	212	224
	SouthBP404	88	106	163	163	182	184	265	291	144	162	137	141	186	194	115	117	176	178	138	142	178	178	213	217	121	121	208	222
	SouthBP405	88	104	159	159	186	188	271	283	156	158	137	137	190	194	105	111	174	174	140	142	178	178	211	215	121	121	212	224
	SouthBP406	100	108	161	167	180	188	271	299	154	156	137	151	194	194	113	113	178	180	146	148	176	176	211	213	119	123	226	228
	SouthBP407	86	104	159	161	180	182	275	295	138	142	137	141	188	190	107	111	176	178	148	152	178	178	211	215	123	125	212	220
	SouthBP408	88	88	159	163	184	184	273	291	144	170	137	141	194	194	107	115	176	176	138	140	178	178	213	217	119	121	212	222
	SouthBP409	96	106	159	167	182	186	265	273	154	166	137	139	186	196	115	115	174	178	128	142	178	180	205	217	121	121	218	220
	SouthBP410	104	106	157	159	182	186	277	281	144	158	141	141	186	194	105	115	180	180	140	148	178	178	209	211	125	127	220	220
	SouthBP411	104	104	157	159	174	178	265	273	142	172	139	139	192	192	115	119	176	180	138	152	-9	-9	209	209	119	123	228	230
	SouthBP412	104	106	161	161	178	182	-9	-9	140	158	137	137	192	194	105	115	176	178	136	138	174	178	217	217	117	123	-9	-9
	SouthBP413	104	108	159	163	178	186	277	277	142	158	137	141	186	194	115	115	176	178	146	148	174	178	217	221	127	127	214	216
	SouthBP414	92	104	159	167	182	186	259	269	158	160	135	137	190	194	105	107	174	178	138	154	178	180	211	211	123	123	208	212
	SouthBP415	88	108	155	159	182	186	265	265	154	158	137	143	190	194	105	117	174	178	126	138	172	178	205	213	115	123	206	208
	SouthBP416	88	88	163	167	174	188	273	273	138	142	139	141	194	194	113	115	178	178	138	140	178	178	213	213	113	123	208	220
	SouthBP417	-9	-9	161	167	174	180	271	273	138	158	137	141	194	198	115	117	174	174	138	144	176	178	211	215	123	123	-9	-9
	SouthBP418	88	88	159	163	178	188	271	273	140	172	137	137	190	190	113	119	180	184	140	148	178	178	211	213	115	119	200	220
	SouthBP419	98	98	159	159	178	188	-9	-9	142	158	139	139	194	194	105	117	174	178	140	140	174	174	217	219	125	127	218	230
	SouthBP420	88	108	159	163	178	184	273	277	138	162	137	141	192	194	107	115	174	176	140	148	174	178	211	217	119	119	220	226
	SouthBP421	100	104	159	161	178	186	273	279	158	172	143	143	190	192	105	123	178	178	140	148	172	172	205	213	125	125	212	212
	SouthBP422	104	108	159	161	176	188	287	287	140	160	141	141	192	194	111	115	174	178	144	148	178	182	207	213	119	119	212	218
	SouthBP423	88	104	159	161	178	180	271	273	138	142	139	141	194	194	107	117	174	180	-9	-9	174	176	-9	-9	115	123	220	222
	SouthBP424	88	100	159	163	180	186	269	273	138	148	139	141	192	194	107	115	174	178	138	140	178	178	205	217	119	121	224	224
	SouthBP425	88	100	159	161	178	178	-9	-9	156	162	137	139	-9	-9	105	117	178	180	138	146	172	178	211	215	115	121	216	224
	SouthBP426	104	108	159	167	182	186	-9	-9	138	172	141	143	186	192	115	115	178	180	148	158	176	178	211	215	119	121	206	208
	SouthBP427	102	108	159	163	176	188	273	273	142	164	137	141	190	194	103	117	174	176	142	126	180	180	215	217	117	121	200	210
	SouthBP428	100	100	163	167	178	188	265	277	140	156	137	141	190	194	115	117	178	178	138	138	178	180	211	215	113	121	200	228
	SouthBP429	100	108	163	163	180	186	-9	-9	142	164	137	137	194	196	105	115	176	180	156	156	172	180	205	209	119	125	208	208
	SouthBP430	92	100	159	163	184	186	273	287	142	154	135	147	188	194	105	117	178	178	140	158	176	178	211	213	119	121	208	208
	SouthBP431	106	108	161	165	176	178	271	273	138	164	135	137	194	194	113	113	174	176	128	140	176	176	211	213	115	121	208	212
	SouthBP432	88	106	163	167	186	188	275	285	142	160	137	141	194	194	113	117	176	178	140	142	178	180	213	217	123	125	200	220
	SouthBP433	88	100	159	167	178	188	-9	-9	138	160	139	141	194	196	113	117	178	178	140	140	-9	-9	-9	-9	121	123	206	208
	SouthBP434	90	108	155	167	178	178	265	285	138	162	137	139	190	194	107	117	176	178	146	158	176	176	207	213	115	113	212	220
	SouthBP435	92	96	159	167	178	186	285	293	140	154	141	143	190	190	115	117	176	182	148	148	174	178	211	213	121	125	218	218
	SouthBP436	88	106	159	159	176	178	263	273	142	162	137	141	188	194	115	117	176	178	138	140	178	178	209	213	123	123	220	230
	SouthBP437	88	104	159	163	178	186	283	283	140	164	137	137	194	194	107	117	174	178	138	148	174	178	209	215	121	123	208	222
	SouthBP438	88	100	157	167	178	186	273	273	154	162	141	141	186	186	111	117	174	176	140	144	178	178	209	213	121	127	206	222
	SouthBP439	92	104	159	167	184	188	265	269	138	162	141	141	192	194	107	115	176	178	140	148	174	178	215	217	123	123	206	212
	SouthBP440	98	100	159	167	180	188	271	273	138	142	133	141	192	196	111	115	166	172	-9	-9	174	180	213	217	121	129	208	218
	SouthBP441	88	104	155	163	178	178	265	273	138	138	137	141	190	198	109	115	176	176	140	140	176	178	211	215	121	125	-9	-9
	SouthBP442	88	104	159	165	186	186	273	273	138	142	137	141	192	192	109	115	174	176	140	140	176	178	211	215	121	125	224	228
	SouthBP443	100	100	161	167	176	180	265	273	160	160	139	141	188	190	115	117	176	178	154	156	174	178	205	211	119	127	208	230
	SouthBP444	96	104	159	159	178	180	271	273	156	160	137	139	190	196	107	117	176	180	138	154	178	178	215	217	121	121	210	218
	SouthBP445	88	108	161	165	178	180	273	273	138	152	137	141	192	194	115	115	174	178	140	144	178	180	211	215	123	125	212	230
	SouthBP446	88	100	159	167	186	186	281	285	140	158	133	133	194	194	115	117	176	178	138	140	174	178	211	217	119	125	220	220
	SouthBP447	88	104	161	167	178	184	273	281	138	142	137	141	186	192	107	107	178	178	140	140	178	178	207	213	125	127	220	222
	SouthBP448	88	100	159	167	180	186	281	285	140	158	133	133	190	192	115	117	176	178	138	140	174	178	211	217	119	119	220	220
	SouthBP449	92	104	159	167	178	178	265	283	142	156	137	137	190	196	105	109	174	176	142	144	178	178	211	217	117	121	206	222
	SouthBP450	92	100	159	163	180	186	265	269	146	154	137	139	192	196	107	117	174	180	140	140	178	178	205	205	121	121	208	224
	SouthBP451	104	108	163	167	178	188	277	279	148	154	137	137	190	190	115	117	178	178	146	146	178	182	-9	-9	123	127	218	226
	SouthBP452	88	104	159	163	180	182	271	275	154	162	133	137	186	190	115	115	176	178	128	140	178	178	211	213	121	125	214	220
	SouthBP453	100	104	157	161	184	186	271	273	140	142	135	141	194	194	113	115	174	176	140	156	178	178	211	213	125	125	222	222
	SouthBP454	106	108	159	159	176	178	285	285	138	152	141	141	192	194	115	115	178	178	140	140	178	180	213	213	117	123	212	230
	SouthBP455	88	100	159	159	186	186	273	295	140	140	133	137	190	192	115	115	176	178	140	146	172	178	207	217	127	129	212	220
	SouthBP456	100	104	163	167	180	186	273	275	138	156	133	139	190	192	117	119	176	178	128	140	176	180	213	215	121	127	220	230
	SouthBP457	88	98	155	161	176	180	273	273	156	156	137	141	192	194	115	119	174	176	138	138	178	182	209	213	121	127	220	226
	SouthBP458	100	104	159	163	180	188	273	275	-9	-9	135	141	194	194	113	115	174	176	144	148	178	178	209	213	121	125	-9	-9
	SouthBP459	100	104	163	165	180	188	273	285	156	158	133	141	192	194	107	117	176	180	140	140	174	178	211	217	119	127	222	222
	SouthBP460	100	108	161	165	180	180	293	293	138	146	137	137	190	192	115	117	176	176	144	144	178	182	215	215	125	125	230	230
	SouthBP461	100	104	159	161	178	180	273	285	140	156	137	137	186	190	115	117	174	176	144	148	178	178	209	213	121	125	218	220
	SouthBP462	102	108	163	167	176	186	-9	-9	138	164	137	137	190	196	113	117	174	176	138	140	178	178	215	215	117	123	210	222
	SouthBP463	88	96	155	163	178	178	265	273	138	138	137	147	190	198	105	107	174	178	140	148	174	176	211	211	117	125	208	208
	SouthBP464	102	110	157	159	178	178	273	273	138	156	141	141	192	194	111	115	176	178	138	140	178	178	213	213	121	127	220	222
	SouthBP465	104	106	157	167	176	178	273	295	-9	-9	137	141	188	194	115	117	174	178	138	140	178	182	209	211	117	121	220	230
	SouthBP466	106	106	159	161	178	186	269	269	142	160	141	143	188	190	115	115	174	178	138	146	178	178	205	217	119	125	218	218
	SouthBP467	88	96	159	165	186	186	-9	-9	138	142	137	147	192	192	105	107	174	178	140	148	174	176	211	211	117	125	208	230
	SouthBP468	88	100	155	163	176	186	273	273	156	160	137	139	190	194	107	117	174	178	138	156	178	178	211	213	121	127	212	230
	SouthBP469	104	110	155	159	178	186	275	283	152	162	141	141	190	194	111	115	178	178	128	138	178	182	211	211	115	121	220	228
	SouthBP470	88	100	159	167	188	188	265	271	138	138	137	139	190	192	109	115	178	182	138	144	178	178	211	211	115	119	212	220
	SouthBP471	102	108	159	165	180	186	273	287	138	140	141	141	186	190	115	117	178	180	134	140	176	178	211	213	117	121	220	220
	SouthBP472	96	106	155	159	186	188	275	285	152	156	137	139	192	194	115	117	178	178	140	148	178	180	205	211	121	125	208	226
	SouthBP473	88	100	159	163	178	186	271	273	138	158	137	141	192	196	109	115	172	178	138	140	174	178	211	213	121	121	200	212
	SouthBP474	88	98	159	167	178	186	273	295	138	158	133	137	194	194	115	117	174	178	138	140	180	182	211	215	121	125	208	220
	SouthBP475	88	104	159	163	176	180	265	295	140	144	137	141	190	194	115	115	178	180	128	156	174	178	211	213	113	121	208	230
	SouthBP476	92	104	167	167	178	180	265	295	142	156	137	139	188	196	117	117	178	178	140	148	178	180	205	213	127	127	206	230
	SouthBP477	88	100	159	159	180	186	265	269	138	170	141	141	186	192	107	115	174	174	138	156	174	180	215	217	119	121	218	222
	SouthBP478	104	106	159	163	180	188	273	275	138	162	133	137	186	192	113	119	178	180	128	146	176	178	213	217	121	127	208	220
	SouthBP479	88	100	159	159	178	182	271	271	142	158	139	141	192	192	115	117	174	176	144	152	178	178	205	215	117	117	206	218
	SouthBP480	100	104	159	163	178	186	273	287	142	142	139	141	194	194	115	117	176	180	140	142	178	178	211	217	115	125	208	212
	SouthBP481	88	92	163	163	178	180	265	283	156	158	137	137	192	196	105	115	178	180	146	156	174	174	211	211	119	125	208	222
	SouthBP482	90	106	161	163	176	178	273	285	142	152	133	139	192	194	115	117	176	178	140	146	178	178	211	217	119	123	208	208
	SouthBP483	88	100	159	163	178	186	271	273	138	156	137	141	192	196	109	115	172	178	138	140	176	180	211	213	121	121	212	212
	SouthBP484	110	110	159	165	178	178	-9	-9	158	164	139	141	192	194	115	117	174	178	140	158	178	178	213	215	121	127	210	232
	SouthBP485	104	104	155	167	178	178	287	293	152	156	137	139	188	194	115	115	174	180	126	142	174	180	213	215	121	127	226	228
	SouthBP486	88	100	159	165	186	186	271	285	138	138	137	137	192	192	109	115	176	178	140	144	176	178	213	215	117	121	208	212
	SouthBP487	88	88	157	167	176	178	283	285	142	162	141	141	194	196	115	117	176	178	150	152	176	178	209	217	125	127	208	220
	SouthBP488	100	104	159	163	178	186	-9	-9	142	142	139	141	194	194	115	117	176	178	140	142	178	178	211	213	113	115	208	212
	SouthBP489	88	92	161	167	178	186	289	291	146	156	137	137	190	198	115	117	176	176	140	154	174	178	205	207	123	123	230	230
	SouthBP490	88	88	159	167	180	186	283	297	152	166	139	139	190	194	115	117	178	178	148	148	180	180	207	209	121	123	216	220
	SouthBP491	104	108	161	167	178	182	287	291	144	158	137	141	188	192	115	117	178	178	152	156	178	178	211	213	121	125	208	222
	SouthBP492	88	104	159	163	178	186	269	273	142	162	137	141	190	192	113	115	178	180	140	146	178	178	205	213	113	125	208	216
	SouthBP493	88	108	159	159	178	188	277	293	146	156	137	137	194	194	115	119	178	180	148	154	178	180	209	217	119	125	222	224
	SouthBP494	104	108	159	161	178	188	271	273	156	160	137	139	194	194	115	117	180	180	140	146	178	178	213	215	115	123	206	208
	SouthBP495	-9	-9	159	159	180	180	-9	-9	136	136	133	137	194	194	115	119	176	178	156	158	174	178	205	213	113	119	208	210
	SouthBP496	100	108	159	159	178	186	273	279	142	156	137	143	190	194	105	115	176	180	140	148	178	178	205	209	125	125	206	222
	SouthBP497	102	108	159	161	180	186	265	273	140	154	137	141	194	194	115	117	176	180	138	140	178	178	207	211	117	123	210	222
	SouthBP498	88	102	159	159	178	188	265	273	140	158	137	137	180	190	105	113	178	184	148	148	178	178	205	207	125	125	208	208
	SouthBP499	88	88	161	165	174	178	273	285	146	152	139	141	190	194	107	117	176	178	138	140	174	176	213	215	119	127	208	220
	SouthBP500	88	100	159	159	178	188	279	293	156	156	137	141	186	190	105	117	178	180	138	154	174	176	209	217	119	121	208	208
	SouthBP501	96	106	163	167	178	182	265	273	162	166	137	139	186	194	105	117	174	178	140	142	178	178	209	217	119	121	208	226
	SouthBP502	88	106	159	159	186	186	277	281	140	162	137	141	194	194	115	115	168	174	142	148	174	178	209	215	121	125	212	220
	SouthBP503	106	106	159	159	180	186	265	277	158	166	137	139	192	194	113	117	180	180	140	142	174	180	205	211	113	121	208	212
	SouthBP504	88	88	159	167	174	180	263	273	142	154	137	139	194	194	105	117	174	180	156	158	180	180	209	209	125	125	200	228
	SouthBP505	88	106	159	159	178	186	273	295	156	158	137	141	194	196	105	115	176	178	138	148	176	178	209	213	115	119	206	212
	SouthBP506	88	104	155	167	180	188	267	279	156	156	133	141	192	194	115	117	176	178	140	158	178	178	213	215	115	119	200	218
	SouthBP507	92	104	159	159	174	180	265	287	146	162	137	141	180	196	111	115	174	178	140	156	176	178	209	209	121	123	208	228
	SouthBP508	88	106	159	167	178	188	281	289	152	162	137	139	186	190	115	115	174	180	140	152	178	178	209	215	113	125	208	212
	SouthBP509	88	88	159	159	184	186	265	273	142	146	133	135	190	192	115	115	174	176	138	156	178	178	217	217	115	127	220	220
	SouthBP510	88	104	159	167	178	184	273	285	142	142	135	137	190	194	105	115	174	178	140	142	178	178	213	213	121	121	208	228
	SouthBP511	88	88	157	165	180	180	271	277	152	162	133	137	190	196	115	117	176	178	140	156	178	178	205	213	121	129	220	220
	SouthBP512	104	104	159	167	182	186	265	273	158	162	133	139	194	194	107	115	178	184	144	146	178	180	213	215	117	119	200	218
	SouthBP513	88	92	167	167	186	188	265	281	152	154	141	143	190	196	117	117	176	178	138	158	178	178	211	213	119	123	220	222
	SouthBP514	86	106	159	167	178	178	273	279	140	142	133	137	186	192	105	115	178	178	142	158	178	178	207	213	127	127	200	224
	SouthBP515	88	98	155	161	178	190	275	281	156	170	137	137	192	194	111	115	178	180	154	156	178	178	209	213	121	121	200	208
	SouthBP516	88	104	159	163	180	186	273	275	140	140	137	137	194	194	107	117	178	180	138	140	178	178	211	213	125	125	212	228
	SouthBP517	100	104	159	169	178	186	273	287	154	160	137	137	188	194	107	111	178	178	122	144	176	178	215	217	115	123	212	230
	SouthBP518	88	98	159	163	180	188	279	281	142	162	137	139	186	194	113	115	180	180	148	152	178	178	209	217	113	127	208	212
	SouthBP519	100	104	159	167	186	186	273	281	146	152	137	141	190	194	113	117	176	176	148	152	166	174	213	213	119	127	208	220
	SouthBP520	100	104	159	159	174	184	285	285	140	162	137	137	192	192	113	117	174	178	138	158	178	178	211	213	121	125	208	216
	SouthBP521	88	104	163	163	180	180	275	283	152	152	141	141	188	194	107	115	176	176	146	152	178	178	203	215	115	121	222	228
	SouthBP522	88	98	163	163	178	182	283	283	140	154	137	139	190	198	107	115	176	176	146	152	178	178	203	215	115	121	222	228
	SouthBP523	106	106	163	163	180	186	273	283	140	152	133	137	186	192	115	115	176	180	146	156	174	178	209	211	119	125	208	222
	SouthBP524	-9	-9	159	159	174	186	281	295	146	154	139	141	192	192	111	115	178	178	140	150	174	174	207	209	123	127	206	228
	SouthBP525	-9	-9	159	163	174	178	265	271	138	156	137	137	194	194	113	115	168	180	140	140	178	178	203	215	121	127	206	220
	SouthBP526	-9	-9	157	163	174	176	275	275	140	148	137	141	190	192	115	115	-9	-9	122	138	182	182	209	211	119	121	-9	-9
	SouthBP527	88	100	159	159	178	186	-9	-9	-9	-9	137	141	186	192	111	115	176	178	146	154	178	178	209	215	125	125	212	220
	SouthBP528	-9	-9	159	163	180	180	265	285	146	170	139	141	-9	-9	115	117	176	176	138	140	174	178	209	209	119	125	220	222
	SouthBP529	100	104	155	167	174	178	273	275	138	162	137	139	192	196	115	117	176	176	156	158	172	178	209	215	-9	-9	-9	-9
	SouthBP530	88	104	165	167	174	178	273	273	146	162	135	139	192	196	113	117	174	176	148	156	172	180	215	215	125	125	208	224
	SouthBP531	88	98	155	167	176	180	273	279	140	142	137	147	190	194	113	115	178	182	138	146	174	178	213	213	119	123	206	206
	SouthBP532	104	104	161	167	178	180	297	297	162	162	137	139	180	194	115	117	176	178	140	158	178	178	211	217	119	119	206	206
	SouthBP533	88	104	161	167	174	178	273	273	138	156	135	137	186	190	115	117	176	180	152	156	172	178	215	217	119	121	208	208
	SouthBP534	88	104	159	163	182	186	263	273	162	170	137	137	190	194	105	119	176	178	140	140	178	180	213	213	115	119	208	210
	SouthBP535	88	104	161	165	174	184	273	273	152	154	137	139	190	194	105	113	180	180	140	140	178	178	213	213	119	123	210	224
	SouthBP536	-9	-9	159	161	178	188	277	279	140	146	139	141	192	194	111	117	178	178	122	140	178	182	213	213	121	125	-9	-9
	SouthBP537	104	106	159	161	186	186	273	279	140	170	139	141	190	194	113	117	174	176	122	154	176	180	215	217	115	121	208	218
	SouthBP538	104	106	163	167	180	186	265	273	146	170	133	137	190	194	113	115	176	178	140	150	176	178	213	213	119	127	212	220
	SouthBP539	-9	-9	-9	-9	174	178	273	275	138	138	137	139	-9	-9	115	117	176	180	156	158	172	178	215	217	119	121	208	222
	SouthBP540	104	104	167	167	174	174	273	273	138	162	135	137	190	192	113	117	176	178	156	156	172	174	215	217	121	125	208	220
	SouthBP541	104	104	167	167	174	182	265	265	138	152	137	139	190	194	107	117	174	178	140	156	174	180	209	215	121	127	218	220
	SouthBP542	104	104	165	167	188	192	271	271	138	162	135	137	190	192	113	117	176	178	156	156	172	174	215	217	121	125	208	220
	SouthBP543	88	98	161	163	174	174	273	301	156	156	137	137	194	194	105	115	178	180	140	148	178	180	213	217	125	127	218	220
	SouthBP544	96	104	159	167	178	188	265	265	138	156	141	141	194	194	117	117	174	178	140	158	170	180	211	213	125	125	206	206
	SouthBP545	88	100	155	159	178	188	273	275	156	162	137	139	194	196	115	115	176	180	140	158	174	178	209	213	115	121	222	228
	SouthBP546	88	104	161	163	176	180	289	289	140	140	139	141	194	194	113	117	174	178	140	154	174	176	213	213	121	121	212	218
	SouthBP547	104	104	159	163	178	186	273	281	152	158	137	147	194	198	101	107	178	184	140	140	178	178	213	215	123	125	208	208
	SouthBP548	104	108	159	167	182	186	265	273	152	152	137	139	194	194	107	113	174	178	140	148	176	180	209	213	125	127	-9	-9
	SouthBP549	88	100	159	165	176	182	265	283	146	156	133	141	194	194	111	115	176	178	138	140	174	180	211	213	113	119	206	206
	SouthBP550	104	104	157	161	178	178	273	277	138	140	141	141	180	188	115	117	180	180	140	158	178	180	211	213	117	119	220	220
	SouthBP551	96	108	159	167	180	184	273	273	156	162	133	137	194	196	105	117	178	180	150	158	178	178	209	213	119	121	206	230
	SouthBP552	88	104	163	167	174	188	265	295	146	162	137	143	194	196	111	115	174	180	138	148	176	178	211	215	121	123	208	228
	SouthBP553	88	104	159	159	186	186	273	283	142	146	137	137	190	192	105	115	180	180	140	148	178	178	205	219	115	127	220	220
	SouthBP554	88	100	159	167	186	186	273	283	142	146	137	137	190	192	117	117	176	176	140	148	178	182	205	207	125	125	208	220
	SouthBP555	88	104	159	159	174	182	265	271	156	162	133	141	192	194	111	115	180	182	140	158	176	178	207	217	115	127	222	224
	SouthBP556	88	104	159	167	178	180	273	283	138	162	137	139	192	196	113	115	176	180	140	148	174	178	211	215	119	125	220	220
	SouthBP557	104	104	159	163	186	188	265	271	140	140	137	143	192	194	109	117	178	178	132	140	166	178	211	217	115	125	206	206
	SouthBP558	88	104	159	159	178	186	273	281	138	140	137	141	190	190	113	115	178	178	148	158	180	182	211	213	125	127	212	220
	SouthBP559	88	88	161	165	180	186	267	267	154	164	137	137	192	194	111	111	176	182	142	148	174	178	211	213	113	121	224	224
	SouthBP560	88	108	155	161	178	180	273	287	138	154	141	141	192	194	113	117	176	178	140	156	178	178	211	213	121	125	220	222
	SouthBP561	88	88	159	159	182	186	273	291	140	146	137	141	190	192	115	115	178	178	128	140	178	180	213	215	125	129	206	208
	SouthBP562	88	102	155	163	186	186	279	291	152	152	137	141	186	190	115	117	178	180	128	150	176	178	211	217	119	123	206	222
	SouthBP563	104	106	159	163	178	186	271	287	138	146	137	137	188	194	115	117	178	182	140	140	178	178	205	217	115	125	206	206
	SouthBP564	88	106	161	161	178	184	269	273	138	142	139	141	192	192	117	119	178	178	140	140	176	178	209	215	121	123	208	218
	SouthBP565	88	106	159	163	178	180	273	273	138	140	137	139	192	192	113	117	176	178	138	148	176	178	211	213	125	125	206	220
	SouthBP566	98	106	159	163	180	186	267	273	140	140	137	141	192	192	111	117	178	178	138	146	176	176	211	217	115	125	206	220
	SouthBP567	100	110	159	167	178	178	273	289	140	142	137	141	192	196	113	115	176	176	138	140	178	180	209	209	121	125	208	208
	SouthBP568	88	88	157	163	-9	-9	273	273	140	162	137	141	190	192	115	117	176	178	138	148	176	182	211	213	121	125	220	220
	SouthBP569	88	106	159	163	174	180	271	273	140	162	137	141	192	192	117	117	178	178	138	138	176	176	211	213	125	125	220	220
	SouthBP570	88	92	159	163	174	186	265	279	154	156	133	141	180	194	111	117	176	180	128	142	178	178	211	213	119	121	206	212
	SouthBP571	98	106	163	163	186	186	279	291	152	152	133	137	186	190	105	115	176	178	140	148	178	178	211	213	121	123	208	222
	SouthBP572	88	100	163	165	178	180	265	287	138	154	137	137	194	194	117	117	176	176	140	148	-9	-9	205	207	125	125	208	220
	SouthBP573	98	100	159	165	180	182	273	275	138	142	137	141	194	196	115	115	172	174	140	148	172	178	205	207	121	121	220	220
	SouthBP574	96	108	159	159	178	186	273	273	138	152	133	137	188	192	105	117	178	180	150	158	178	178	209	213	119	121	206	230
	SouthBP575	88	102	167	167	176	186	265	275	154	160	135	137	192	194	117	117	176	176	138	142	178	178	211	211	119	125	-9	-9
	SouthBP576	88	102	163	167	178	188	273	273	138	154	137	141	192	192	115	117	178	180	128	150	178	178	211	217	119	123	206	222
	SouthBP577	88	102	163	167	180	186	265	289	138	138	137	141	194	194	115	115	178	178	138	158	174	174	215	215	125	125	206	208
	SouthBP578	106	106	159	167	186	188	265	275	152	156	135	137	188	194	101	115	176	178	140	140	172	178	213	217	121	125	208	208
	SouthBP579	88	108	159	163	176	180	267	285	156	158	137	137	190	192	113	117	176	180	128	138	178	182	211	211	113	121	220	220
	SouthBP580	100	106	155	159	180	186	285	285	152	156	137	137	186	190	115	117	180	182	128	128	176	178	205	211	121	125	212	228
	SouthBP581	100	104	161	163	174	180	281	291	138	154	137	141	192	196	117	117	176	178	140	156	172	176	211	213	113	113	210	228
	SouthBP582	88	104	159	163	176	180	275	275	158	158	137	141	192	192	115	117	178	180	140	148	178	182	211	213	113	121	208	224
	SouthBP583	88	88	159	159	178	186	271	295	152	154	137	137	194	198	115	115	176	180	148	156	174	178	209	213	119	125	208	224
	SouthBP584	88	104	163	163	178	180	275	275	140	142	139	141	192	194	111	115	176	176	140	156	174	178	211	215	121	125	206	208
	SouthBP585	88	102	159	163	182	188	271	273	142	144	133	137	194	194	115	115	176	178	144	152	178	178	205	211	113	119	222	222
	SouthBP586	88	106	159	159	178	182	285	285	140	152	135	135	194	194	115	117	178	180	128	156	174	174	213	213	119	119	208	210
	SouthBP587	88	88	159	163	178	182	271	271	140	152	135	137	190	194	115	117	176	180	128	144	172	174	205	213	119	121	210	228
	SouthBP588	100	100	159	159	178	188	265	265	138	142	133	143	194	198	113	115	176	178	138	144	178	178	205	213	119	121	206	220
	SouthBP589	88	102	159	163	180	188	273	285	138	140	137	137	192	192	117	117	178	180	142	148	178	182	209	211	121	125	206	210
	SouthBP590	88	106	159	159	186	188	273	281	152	154	137	137	198	198	115	117	176	176	148	156	178	178	209	213	115	127	208	220
	SouthBP591	88	100	163	167	-9	-9	271	281	152	164	133	137	192	194	111	115	176	182	152	152	178	182	211	211	121	123	220	222
	SouthBP592	104	108	163	165	180	180	285	291	138	158	141	141	192	196	113	117	176	176	128	140	176	182	205	215	113	117	206	208
	SouthBP593	102	104	159	163	174	182	281	283	140	152	137	141	192	198	111	115	176	178	154	158	178	178	211	217	119	119	220	222
	SouthBP594	88	100	161	165	178	186	273	295	152	154	137	139	194	194	115	117	178	178	140	152	178	178	205	205	121	121	208	224
	SouthBP595	98	108	159	165	178	180	273	283	140	140	135	137	192	194	115	117	176	176	138	156	176	178	211	211	119	121	222	228
	SouthBP596	106	106	161	167	178	186	287	295	140	152	137	139	194	196	115	117	176	176	138	140	174	178	211	213	121	127	208	208
	SouthBP597	104	108	161	167	-9	-9	283	283	140	154	135	141	190	190	115	117	176	182	148	152	176	178	205	217	113	127	206	228
	SouthBP598	88	104	159	163	178	188	263	271	140	156	137	141	190	190	115	117	176	180	144	148	174	174	205	209	115	119	224	228
	SouthBP599	100	104	155	159	180	184	279	283	146	152	137	143	190	194	115	115	178	178	140	140	178	178	209	215	123	125	206	212
	SouthBP600	104	104	159	163	180	180	263	263	156	158	139	141	192	192	117	119	172	178	140	140	174	182	211	211	121	121	208	224
	SouthBP601	88	100	167	167	178	178	271	281	142	152	137	137	192	194	111	111	176	182	140	152	174	182	211	211	121	123	206	220
	SouthBP602	98	104	159	161	178	186	271	273	156	158	137	137	192	192	111	117	174	178	146	156	174	178	215	215	119	127	206	214
	SouthBP603	88	100	163	165	178	180	265	275	138	138	141	143	194	194	115	117	176	182	138	156	174	178	213	213	125	125	206	212
	SouthBP604	100	108	159	159	186	186	269	273	142	158	137	137	194	194	115	115	176	178	138	140	178	180	211	217	113	115	206	222
	SouthBP605	88	104	159	163	178	186	269	273	140	140	133	135	194	194	113	117	176	182	138	140	174	176	205	211	121	127	212	228
	SouthBP606	88	104	159	159	182	188	263	271	140	152	137	139	190	190	115	115	172	180	140	144	174	178	211	213	119	121	210	220
	SouthBP607	88	100	163	163	178	186	273	281	154	154	137	139	190	194	111	115	176	176	126	140	178	178	213	213	121	121	208	220
	SouthBP608	96	106	159	159	180	186	269	269	140	154	139	141	186	196	109	117	176	178	140	140	178	178	213	217	121	121	206	206
	SouthBP609	88	96	159	159	178	178	-9	-9	152	160	137	141	-9	-9	115	117	176	178	138	146	174	174	209	213	113	123	212	228
	SouthBP610	86	92	159	163	-9	-9	271	275	146	152	-9	-9	-9	-9	105	111	176	178	128	146	176	178	209	215	121	125	206	212
	SouthBP611	88	98	159	159	178	186	281	281	152	156	131	141	188	194	115	115	176	178	128	146	178	178	213	213	121	125	198	228
	SouthBP612	88	96	159	159	186	186	275	277	138	140	137	141	192	196	-9	-9	178	180	128	146	176	178	205	211	-9	-9	206	220
	SouthBP613	88	108	159	159	178	180	273	275	152	160	137	141	194	196	115	117	176	176	128	156	174	182	203	215	121	123	204	212
	SouthBP614	96	108	159	159	178	180	269	273	164	164	133	141	-9	-9	115	117	176	178	128	156	174	178	209	215	113	115	204	220
	SouthBP615	88	100	159	159	178	188	265	279	142	152	139	141	-9	-9	115	117	176	178	140	148	178	178	209	215	115	121	206	206
	SouthBP616	86	88	159	159	178	188	-9	-9	132	154	137	141	192	192	115	117	176	178	138	138	172	174	213	215	113	115	204	228
	SouthBP617	88	104	155	159	180	188	271	287	142	154	137	137	-9	-9	113	119	176	176	138	148	174	178	213	215	117	123	206	220
	SouthBP618	88	110	-9	-9	174	178	-9	-9	140	142	137	137	-9	-9	111	117	176	176	138	158	178	182	209	209	121	121	222	222
	SouthBP619	88	88	159	159	178	182	271	271	138	138	137	139	190	194	105	117	176	176	138	142	178	182	211	211	121	121	206	210
	SouthBP620	88	104	159	163	178	182	283	303	154	160	137	137	190	190	115	117	178	180	146	158	174	174	205	213	117	121	220	220
	SouthBP621	104	108	159	159	178	186	269	289	138	142	137	141	192	192	115	115	176	178	146	156	174	178	211	211	115	125	226	228
	SouthBP622	88	108	159	167	178	188	269	281	138	156	133	137	192	194	117	117	176	176	140	158	172	182	209	211	121	127	220	220
	SouthBP623	96	100	161	165	178	182	271	281	140	154	137	141	190	192	113	117	178	178	140	148	178	178	205	213	115	121	208	222
	SouthBP624	88	106	159	163	186	186	273	283	138	156	137	139	190	194	105	111	178	178	138	140	174	176	205	213	115	121	208	222
	SouthBP625	100	104	167	167	176	178	271	303	140	160	133	137	190	192	105	117	176	178	140	140	174	178	211	215	121	123	200	206
	SouthBP626	98	108	159	163	174	186	275	283	138	138	133	137	190	192	111	115	-9	-9	138	148	-9	-9	205	211	115	121	212	212
	SouthBP627	88	98	161	161	174	174	273	273	160	160	137	145	194	194	107	107	178	180	128	140	180	180	207	211	117	121	208	210
	SouthBP628	96	104	161	163	178	184	277	291	154	154	137	139	194	194	113	113	176	178	140	146	178	180	211	211	125	127	212	212
	SouthBP629	88	104	167	167	-9	-9	267	267	156	158	133	139	190	194	105	115	176	178	140	140	178	178	209	213	115	119	208	208
	SouthBP630	88	88	165	167	184	184	273	273	140	146	137	137	190	190	105	113	180	180	140	140	178	178	213	213	119	119	224	228
	SouthBP631	104	108	161	161	174	182	273	273	156	156	137	137	194	194	115	115	178	180	146	148	-9	-9	211	213	119	125	228	228
	SouthBP632	88	88	167	167	178	188	273	273	-9	-9	137	137	194	198	115	115	176	176	140	158	178	178	213	217	119	127	216	220
	SouthBP633	96	104	165	165	178	184	269	279	140	154	137	139	194	194	115	115	180	180	154	158	180	180	209	211	117	121	228	228
	SouthBP634	96	104	159	163	-9	-9	279	293	154	154	137	139	194	194	113	115	176	178	140	158	180	180	211	213	121	125	212	212
	SouthBP635	88	94	165	167	178	184	267	271	140	152	137	137	190	194	115	115	176	178	138	158	178	180	211	213	113	119	206	230
	SouthBP636	96	104	163	165	180	180	269	273	140	140	141	141	194	194	113	115	178	178	128	148	178	180	209	213	113	121	226	228
	SouthBP637	104	108	159	167	178	178	269	279	140	152	141	147	190	194	115	119	174	176	142	146	178	178	213	213	119	119	226	228
	SouthBP638	88	100	159	167	178	184	273	273	138	140	133	139	194	194	105	111	176	176	-9	-9	-9	-9	211	213	123	125	214	214
	SouthBP639	96	96	159	159	184	186	279	279	152	162	137	147	194	194	113	115	172	174	140	158	176	176	211	213	117	117	220	222
	SouthBP640	104	108	159	167	178	178	269	279	152	152	133	141	190	194	113	115	174	180	142	154	178	178	213	213	119	119	228	230
	SouthBP641	88	88	161	161	174	182	273	273	154	158	137	145	194	194	115	117	178	180	146	148	-9	-9	209	215	119	121	218	224
	SouthBP642	88	90	-9	-9	178	186	271	273	138	156	137	137	194	194	105	117	176	176	132	140	-9	-9	207	215	113	115	220	220
	SouthBP643	88	88	159	165	178	178	267	271	138	152	137	139	194	194	105	113	174	178	-9	-9	-9	-9	213	217	119	121	208	220
	SouthBP644	88	90	161	161	174	182	273	273	154	156	137	145	194	194	115	117	178	180	146	148	180	180	215	217	117	119	220	220
	SouthBP645	100	104	163	167	178	178	267	299	140	162	133	139	194	194	107	115	176	178	140	158	178	178	205	211	125	127	212	212
	SouthBP646	104	104	155	167	178	178	277	283	138	156	141	141	194	194	115	115	172	180	140	140	178	178	211	213	119	125	206	218
	SouthBP647	96	104	159	167	178	184	273	273	138	140	133	139	194	194	115	115	176	176	138	140	178	180	211	213	113	119	218	228
	4400noP-Pop1	100	100	159	159	178	186	267	289	142	142	137	141	190	190	115	115	176	180	156	156	178	182	209	209	-9	-9	208	208
	4400noP-Pop2	88	100	159	159	174	176	273	289	140	140	133	141	190	198	115	115	176	180	150	156	178	182	207	207	-9	-9	208	220
	4400noP-Pop3	88	88	159	159	174	174	289	289	142	142	139	141	192	198	115	115	176	180	140	156	178	180	205	207	-9	-9	204	204
	4400noP-Pop4	86	98	163	167	184	186	267	289	140	156	137	139	194	198	115	115	180	180	156	156	182	182	207	209	-9	-9	204	208
	4400noP-Pop5	88	100	159	163	176	184	271	289	140	154	141	141	196	198	115	115	176	180	150	156	180	182	207	207	-9	-9	218	218
	4400noP-Pop6	100	100	159	167	176	178	289	289	140	142	133	141	190	198	115	115	180	180	138	150	178	182	207	209	-9	-9	208	214
	4400noP-Pop7	88	88	159	159	176	178	271	289	140	142	137	141	190	198	115	115	180	180	150	156	178	182	207	209	-9	-9	208	218
	4400noP-Pop8	88	100	159	159	174	178	267	289	140	142	139	141	190	194	115	115	180	180	156	156	182	182	209	209	-9	-9	204	208
	4400noP-Pop9	88	88	159	159	176	184	287	301	152	156	133	139	190	196	115	115	178	180	138	150	178	180	207	209	-9	-9	204	204
	4400noP-Pop10	88	100	159	167	178	184	267	289	142	156	137	141	190	192	115	115	176	176	156	156	182	182	209	209	-9	-9	204	208
	4400noP-Pop11	88	88	163	163	176	190	289	289	140	156	133	141	192	196	115	115	176	180	150	150	180	182	207	207	-9	-9	204	218
	4400noP-Pop12	86	86	163	163	176	190	289	289	138	156	131	139	192	196	115	115	176	180	150	150	180	182	207	207	-9	-9	204	218
	4400noP-Pop13	92	100	159	163	184	186	273	273	140	154	133	141	190	192	115	115	176	176	140	156	178	180	207	209	-9	-9	204	208
	4400noP-Pop14	86	98	155	167	174	186	267	275	138	140	133	139	190	192	115	115	180	180	156	156	180	182	209	211	-9	-9	208	220
	4400noP-Pop15	90	98	159	163	186	186	271	289	140	154	131	139	190	192	115	115	176	180	140	150	178	178	207	209	-9	-9	204	208
	4400noP-Pop16	90	98	159	163	184	186	273	273	138	154	131	139	190	192	115	115	176	176	140	156	178	180	207	209	-9	-9	204	208
	4400noP-Pop17	88	100	155	155	176	186	265	289	142	142	135	141	192	192	115	117	178	180	152	156	178	178	205	209	-9	-9	208	220
	4400noP-Pop18	88	100	163	167	184	186	267	289	142	156	139	141	194	198	115	115	180	180	156	156	182	182	207	209	-9	-9	204	208
	4400noP-Pop19	92	100	159	159	178	186	273	287	142	142	139	141	190	198	115	115	176	180	150	156	178	182	207	209	-9	-9	208	220
	4400noP-Pop20	88	88	163	163	176	190	289	289	154	156	133	141	192	192	115	115	176	180	138	150	180	180	207	213	-9	-9	208	218
	4400noP-Pop21	86	98	159	167	178	186	267	289	140	140	137	139	190	198	101	115	180	180	156	156	178	178	207	209	-9	-9	204	208
	4400noP-Pop22	88	96	159	159	186	186	273	275	142	156	135	137	192	198	115	117	176	178	148	152	178	182	209	211	-9	-9	208	220
	4400noP-Pop23	88	88	159	167	174	184	289	289	140	156	141	141	192	198	115	115	176	180	150	156	-9	-9	209	213	-9	-9	204	204
	4400noP-Pop24	88	100	159	159	178	190	267	289	142	154	133	141	190	192	115	115	180	180	138	156	178	180	209	213	-9	-9	208	218
	4400noP-Pop25	88	100	159	163	176	178	289	289	142	154	141	141	190	192	115	115	178	180	138	138	178	180	207	209	-9	-9	204	218
	4400noP-Pop26	98	98	155	159	186	186	267	275	140	140	131	139	190	190	-9	-9	176	180	-9	-9	178	182	209	211	-9	-9	208	220
	4400noP-Pop27	88	100	159	159	174	184	289	289	142	142	133	141	190	198	115	115	180	180	156	156	180	180	207	213	-9	-9	204	204
	4400noP-Pop28	88	92	159	159	186	186	273	289	142	142	139	141	190	192	113	115	176	180	140	156	-9	-9	205	207	-9	-9	208	220
	4400noP-Pop29	88	100	159	159	174	186	267	273	142	142	137	141	190	198	115	115	176	180	148	156	178	182	205	209	-9	-9	204	208
	4400noP-Pop30	92	100	157	163	178	186	273	289	138	154	137	141	190	192	115	115	176	180	150	156	178	182	205	207	-9	-9	204	220
	4400noP-Pop31	86	98	159	159	178	190	267	289	140	154	131	139	190	192	115	115	180	180	138	156	178	180	209	213	-9	-9	208	218
	4400noP-Pop32	86	98	155	163	176	186	265	289	140	140	133	139	192	192	115	117	178	180	152	156	178	178	205	209	-9	-9	208	220
	4400noP-Pop33	86	98	155	159	176	186	265	301	156	156	133	137	192	196	111	115	178	180	150	156	178	180	205	207	-9	-9	204	220
	4400noP-Pop34	88	100	155	159	176	186	265	301	156	156	135	139	192	196	111	115	178	180	150	156	178	180	205	207	-9	-9	204	220
	4400noP-Pop35	92	96	-9	-9	174	184	265	287	140	158	135	141	194	198	115	115	176	178	138	156	178	180	205	205	-9	-9	208	220
	4400noP-Pop36	100	100	159	163	178	186	267	289	142	142	133	141	190	194	-9	-9	180	180	-9	-9	178	182	207	209	-9	-9	208	210
	4400noP-Pop37	86	98	159	167	178	184	267	289	140	156	135	139	190	192	115	115	176	176	156	156	182	182	-9	-9	-9	-9	204	208
	4400noP-Pop38	88	100	159	163	-9	-9	289	289	142	156	133	141	192	196	115	115	176	180	150	156	180	182	207	209	-9	-9	204	218
	4400noP-Pop39	88	100	159	163	178	184	267	289	142	154	133	141	190	192	115	115	178	180	138	156	178	180	209	213	-9	-9	208	218
	4400noP-Pop40	88	96	155	159	176	184	275	301	142	142	133	135	190	192	115	117	180	180	150	152	178	178	209	211	-9	-9	220	220
	4400noP-Pop41	92	100	159	163	186	186	271	289	142	154	133	141	190	192	115	115	176	180	140	150	-9	-9	207	209	-9	-9	204	208
	4400noP-Pop42	88	88	159	163	190	190	289	301	140	154	141	141	192	196	115	115	176	180	138	156	180	182	207	209	-9	-9	204	208
	4400noP-Pop43	100	100	155	159	186	186	267	275	142	142	133	141	190	190	111	115	176	180	156	156	178	182	209	211	-9	-9	208	208
	4400noP-Pop45	96	100	155	163	184	184	265	267	142	142	133	147	192	194	115	115	178	180	150	152	178	178	209	211	-9	-9	204	220
	4400noP-Pop47	88	100	159	163	178	184	271	289	132	132	133	137	190	190	115	115	180	180	150	156	180	182	207	207	-9	-9	-9	-9
	4400noP-Pop49	88	100	155	167	174	186	267	275	140	140	135	141	190	192	-9	-9	180	180	156	156	180	182	209	211	-9	-9	-9	-9
	4400noP-Pop52	88	100	159	159	186	186	267	273	140	142	139	141	190	198	115	115	176	182	140	156	178	182	205	209	-9	-9	204	208
	4400noP-Pop54	86	86	159	163	184	186	273	289	138	154	131	139	190	192	115	115	180	180	-9	-9	182	182	207	207	-9	-9	204	218
	4400noP-Pop55	88	100	159	159	174	184	267	271	140	142	137	141	196	198	115	115	180	180	150	156	178	182	205	207	-9	-9	208	218
	4400noP-Pop56	88	96	159	163	176	184	275	301	158	166	135	139	192	192	115	117	178	178	156	156	178	180	205	213	-9	-9	208	220
	4400noP-Pop57	88	100	159	159	176	184	271	301	142	142	133	141	190	192	115	115	176	180	138	148	178	180	207	209	-9	-9	208	208
	4400noP-Pop58	86	98	159	167	184	184	271	289	138	140	139	139	192	196	115	115	180	180	150	156	180	180	-9	-9	-9	-9	204	218
	4400noP-Pop59	86	98	159	167	184	184	271	289	138	140	131	139	190	196	115	115	180	180	150	156	-9	-9	207	213	-9	-9	204	218
	4400noP-Pop61	88	88	159	167	174	176	271	289	144	144	141	141	190	192	115	115	-9	-9	148	150	178	182	207	209	-9	-9	204	208
	4400noP-Pop62	86	94	159	159	186	186	273	275	140	156	133	135	192	198	115	117	176	178	148	152	178	182	209	211	-9	-9	208	220
	4400noP-Pop63	86	86	159	167	174	184	289	289	140	156	139	139	192	198	-9	-9	176	180	150	156	180	182	209	213	-9	-9	204	204
	8201noP-Pop1	106	106	159	159	178	186	273	283	144	144	137	137	188	188	115	115	178	180	156	156	178	178	207	211	125	127	220	228
	8201noP-Pop2	88	88	159	167	178	186	273	273	142	142	137	137	188	188	115	115	178	178	156	156	178	178	207	213	127	127	220	222
	8201noP-Pop3	88	106	159	159	178	186	273	283	142	144	137	137	188	194	115	115	178	180	156	156	176	178	207	211	127	127	220	222
	8201noP-Pop4	88	92	165	167	174	178	283	283	144	144	137	137	-9	-9	115	115	178	180	140	140	178	178	207	213	127	127	222	222
	8301noP-Pop1	88	92	159	163	174	178	273	283	142	144	137	137	188	192	115	115	180	180	140	156	176	178	213	213	127	127	222	222
	8301noP-Pop2	88	92	159	159	174	178	273	273	142	144	137	137	188	188	115	115	180	180	140	140	178	178	209	209	127	127	222	222
	8301noP-Pop3	92	106	163	165	178	178	273	283	144	144	137	137	192	192	115	115	180	180	140	140	178	178	209	213	127	127	222	222
	8301noP-Pop4	92	106	159	165	178	178	273	283	142	144	137	137	192	192	115	115	180	180	140	140	176	178	213	213	127	127	222	222
	8301noP-Pop5	106	106	159	159	178	178	277	277	142	142	137	137	188	188	115	115	178	178	140	156	178	178	209	209	127	127	222	228
	8301noP-Pop6	88	106	165	165	174	178	273	283	144	144	137	137	192	192	115	115	178	180	140	140	178	178	209	213	127	127	222	222
	8301noP-Pop7	106	106	159	165	178	178	273	283	144	144	137	137	192	192	115	115	178	180	140	140	178	178	213	213	127	127	222	228
	8301noP-Pop8	88	88	159	159	174	178	273	277	144	144	137	137	188	192	115	115	178	180	140	140	178	178	209	213	127	127	220	228
	8301noP-Pop9	92	92	-9	-9	178	178	273	283	144	144	137	137	192	192	115	115	180	180	140	140	178	178	-9	-9	113	127	210	222
	8301noP-Pop10	92	104	159	163	174	178	273	273	142	156	137	137	192	192	113	115	180	180	156	156	176	178	209	213	117	127	222	222
	8301noP-Pop11	88	88	165	167	178	178	273	273	142	156	137	137	192	194	115	115	180	180	140	156	178	178	213	213	127	127	222	222
	8301noP-Pop12	92	106	167	167	178	178	273	283	142	144	137	137	192	192	115	115	178	180	140	156	178	178	215	215	117	127	220	222
	8301noP-Pop13	96	106	163	163	178	178	273	273	142	156	137	141	188	192	115	115	178	180	140	156	176	178	207	209	123	127	210	222
	8301noP-Pop14	88	88	163	163	174	188	273	283	142	144	137	137	192	194	113	115	172	178	156	156	178	178	207	213	123	127	210	222
	8301noP-Pop15	88	88	163	167	174	188	273	273	156	156	137	137	192	192	113	115	178	180	140	156	178	178	207	213	113	127	210	222
	8301noP-Pop16	88	92	159	165	174	188	273	273	142	142	137	141	192	194	115	117	172	180	156	156	178	180	207	209	113	127	210	222
	8301noP-Pop17	88	88	165	167	178	186	273	273	144	156	137	137	192	192	115	115	180	180	140	156	178	178	213	213	115	127	220	222
	8301noP-Pop18	106	106	159	167	174	178	273	283	142	144	137	137	192	192	115	115	178	180	156	156	176	178	213	215	127	127	222	228
	8301noP-Pop19	88	106	159	165	176	178	273	273	142	144	137	137	192	192	115	115	178	180	140	156	176	178	209	209	127	127	222	222
	8301noP-Pop20	96	96	163	163	174	174	273	273	144	156	137	137	194	194	111	115	176	178	156	156	178	180	213	213	127	127	210	220
	8301noP-Pop21	92	96	159	163	174	184	273	273	142	156	137	137	192	194	111	117	176	178	156	156	178	178	207	213	123	127	210	228
	8301noP-Pop22	88	106	159	165	178	184	273	283	142	144	137	141	192	194	115	115	176	180	140	156	178	178	207	209	113	127	220	222
	8301noP-Pop23	88	92	163	167	174	178	273	283	144	156	137	137	192	192	113	113	178	180	156	156	178	178	209	213	125	127	222	228
	8301noP-Pop24	92	106	-9	-9	178	178	273	283	142	144	137	137	192	192	113	115	178	180	140	156	176	178	209	213	127	127	222	222
	8301noP-Pop25	88	106	159	163	178	178	273	277	142	156	137	137	192	192	115	115	180	180	140	156	178	178	209	215	125	127	222	222
	8301noP-Pop26	92	96	163	163	174	178	273	283	142	144	137	137	192	194	113	115	180	180	156	156	178	180	207	209	123	127	222	222
	8301noP-Pop27	88	106	159	163	174	178	273	283	142	156	137	137	192	192	113	115	178	180	140	140	176	176	209	215	125	127	222	228
	8301noP-Pop28	88	88	165	167	174	178	273	277	144	156	137	137	192	192	115	115	180	180	140	140	178	178	209	213	117	127	220	222
	8301noP-Pop29	88	88	163	163	174	178	273	283	144	156	137	137	192	192	115	115	178	180	140	156	176	178	209	215	125	127	222	228
	8301noP-Pop30	88	92	-9	-9	178	178	273	273	142	144	137	137	188	188	115	115	178	180	140	156	178	178	209	209	125	127	222	228
	8301noP-Pop31	92	106	159	163	-9	-9	273	273	144	144	137	137	192	194	113	115	180	180	156	156	178	180	209	213	123	127	222	222
	8301noP-Pop32	88	88	165	165	178	178	-9	-9	144	144	137	137	192	194	115	115	178	178	140	140	-9	-9	209	209	127	127	222	222
	8301noP-Pop33	88	88	159	163	174	188	273	283	142	144	137	137	192	192	115	115	178	178	140	156	176	178	209	213	125	127	222	228
	8301noP-Pop34	88	92	163	163	174	178	273	283	144	156	137	137	192	194	113	115	178	180	140	156	176	178	209	215	125	125	228	228
	8301noP-Pop35	88	106	159	159	-9	-9	273	283	-9	-9	137	137	192	194	115	115	178	180	140	140	-9	-9	209	209	127	127	222	222
	8301noP-Pop36	88	96	159	159	178	188	273	277	142	142	137	137	192	194	115	115	172	178	156	156	178	178	207	213	123	127	220	228
	8301noP-Pop37	88	92	165	165	178	188	273	273	142	144	137	137	192	192	115	117	172	180	140	156	178	180	209	209	113	127	210	222
	8301noP-Pop38	92	106	159	163	174	178	277	283	142	156	137	137	188	192	113	115	178	180	140	156	178	178	209	209	115	127	222	228
	8301noP-Pop39	92	92	159	163	178	184	273	273	142	156	137	137	192	192	115	115	176	180	156	156	178	178	213	213	123	127	220	222
	8301noP-Pop40	88	88	159	165	178	188	273	277	142	156	-9	-9	192	194	113	115	172	178	140	156	178	180	207	213	123	125	220	228
	8301noP-Pop41	92	92	159	163	178	184	-9	-9	-9	-9	137	137	192	192	113	115	180	180	156	156	178	178	209	209	115	127	222	228
	8301noP-Pop42	88	104	159	165	174	186	273	283	-9	-9	137	137	192	192	115	115	178	180	140	156	178	178	209	213	125	127	222	228
	8301noP-Pop43	92	96	163	163	174	184	273	273	142	156	137	137	188	194	115	115	176	180	156	156	178	178	209	213	119	127	220	222
	8301noP-Pop44	88	92	159	159	188	188	273	273	142	142	137	141	192	194	115	117	176	178	156	156	180	180	207	207	125	127	220	228
	8301noP-Pop45	88	106	159	159	178	178	273	277	140	142	137	137	186	192	113	113	178	180	156	156	176	176	209	213	127	127	220	220
	8301noP-Pop46	104	104	159	159	174	178	277	277	156	156	137	137	186	192	115	115	178	180	140	156	178	178	213	213	117	125	222	228
	8301noP-Pop47	88	104	159	167	174	178	277	277	144	144	137	137	186	192	115	115	178	180	140	156	178	178	213	213	117	125	222	228
	8301noP-Pop48	88	88	159	159	174	188	273	277	140	142	137	141	186	194	115	115	172	178	156	156	180	180	207	213	113	127	220	222
	8301noP-Pop49	88	106	159	159	174	178	273	273	140	142	137	137	188	192	115	115	178	180	140	156	176	178	209	213	127	127	222	222
	8301noP-Pop50	88	106	159	165	178	178	273	273	144	144	137	137	192	194	113	115	178	180	156	156	176	178	-9	-9	117	127	222	222
	8301noP-Pop51	104	88	159	159	174	178	277	277	140	142	137	137	188	192	115	115	178	180	138	156	178	178	213	213	117	125	222	228
	8301noP-Pop52	88	106	159	159	178	178	273	277	140	142	137	137	188	192	113	113	178	180	156	156	176	176	209	213	117	125	222	228
	8301noP-Pop53	104	104	159	159	174	178	277	277	156	156	137	153	188	192	115	115	178	180	138	156	178	182	213	213	117	117	222	228
	8301noP-Pop54	92	106	163	165	174	178	273	273	142	156	137	137	188	192	115	115	178	180	156	156	178	178	209	209	127	127	222	222
	8301noP-Pop55	88	104	163	167	174	178	273	273	144	144	137	137	188	192	115	115	178	180	156	156	176	178	209	213	117	127	222	222
	8301noP-Pop56	88	106	165	167	174	178	273	283	142	156	137	137	188	192	115	115	178	180	140	156	176	176	209	215	125	127	220	222
	8301noP-Pop57	106	106	159	159	178	178	273	273	144	144	137	137	188	194	115	115	178	180	140	156	176	178	209	209	117	127	222	222
	8301noP-Pop58	106	106	159	163	178	178	273	277	140	142	137	137	188	194	113	113	178	178	156	156	178	178	209	213	127	127	220	220
	8301noP-Pop59	88	92	159	159	174	178	273	277	140	142	133	137	192	192	115	115	178	180	140	156	178	178	209	209	127	127	220	222
	8301noP-Pop60	88	106	159	159	174	178	-9	-9	142	142	137	137	192	192	115	115	178	180	138	156	178	178	213	213	127	127	222	228
	8301noP-Pop61	88	92	159	163	174	174	283	283	140	142	137	137	192	192	115	115	178	180	138	156	176	178	213	213	127	127	222	222
	8301noP-Pop62	88	92	163	167	174	178	273	283	140	142	137	137	192	192	113	115	178	180	140	156	176	178	209	215	125	127	222	228
	8301noP-Pop63	88	96	163	163	174	188	273	273	140	142	137	137	192	194	113	115	172	178	156	156	178	180	207	209	123	125	220	228
	8301noP-Pop64	88	88	159	163	174	184	273	273	140	142	137	137	192	194	113	117	172	180	156	156	178	180	207	209	113	125	210	222
	8301noP-Pop65	88	96	159	163	174	188	273	283	140	142	137	137	192	194	113	115	172	178	156	156	176	178	207	209	123	125	220	228
	8301noP-Pop66	88	96	159	163	174	184	273	283	140	142	137	137	192	194	115	117	176	180	140	156	178	180	207	209	123	125	220	228
	8301noP-Pop67	92	96	159	167	174	174	273	283	140	142	137	141	192	194	113	117	172	180	140	156	176	180	207	215	113	127	210	228
	8301noP-Pop68	88	88	-9	-9	178	188	-9	-9	140	142	137	141	192	194	115	115	172	178	140	156	180	180	207	213	123	125	220	228
	8301noP-Pop69	106	106	163	167	178	178	273	277	140	142	137	137	192	194	113	113	178	178	156	156	178	178	209	213	127	127	220	228
	8301noP-Pop70	92	106	163	167	174	188	273	273	140	142	137	141	192	194	115	117	176	180	156	156	178	178	207	213	113	125	210	228
	8301noP-Pop71	88	96	159	159	178	184	273	283	140	142	137	137	194	194	115	115	176	180	156	156	178	178	209	209	113	127	210	222
	8301noP-Pop72	88	106	159	159	178	188	273	273	140	142	137	137	192	194	115	117	172	178	154	154	178	178	207	209	119	123	220	222
	8301noP-Pop73	104	106	159	167	174	174	273	277	144	144	137	137	188	188	115	115	178	180	140	156	178	178	213	213	117	127	222	222
	8301noP-Pop74	88	92	159	163	178	178	273	277	140	142	137	137	188	192	115	115	180	180	140	156	176	178	209	209	127	127	222	222
	8301noP-Pop75	88	106	159	163	178	178	273	283	142	156	137	137	188	192	113	115	178	180	140	156	176	178	209	213	125	127	222	228
	8301noP-Pop76	106	106	159	163	178	178	273	277	140	142	137	137	188	192	115	115	178	180	156	156	176	178	209	209	127	127	222	228
	8301noP-Pop77	106	106	163	163	174	178	273	277	140	142	137	137	188	192	115	115	178	180	156	156	176	178	209	215	117	127	220	228
	8301noP-Pop78	88	106	165	165	178	178	273	277	144	144	137	137	188	192	113	115	178	180	140	140	178	178	209	209	117	127	222	228
	8301noP-Pop79	88	92	165	167	178	178	273	283	144	144	137	137	188	192	115	115	178	180	140	156	178	178	211	213	117	125	222	228
	8301noP-Pop80	88	106	159	159	178	178	273	277	140	142	137	137	188	194	113	115	178	180	156	156	176	178	209	209	117	127	220	220
	8301noP-Pop81	88	106	159	159	186	186	273	277	140	142	137	137	188	194	113	115	178	180	156	156	176	178	209	209	127	127	222	228
	8301noP-Pop82	88	106	159	163	174	184	273	273	140	142	137	141	188	194	113	115	172	180	156	156	178	180	209	209	123	127	220	222
	8301noP-Pop83	92	106	159	167	174	178	277	283	140	142	137	137	188	194	115	115	178	180	140	156	176	178	209	209	125	127	222	228
	8301noP-Pop84	88	88	159	159	174	178	273	283	140	142	137	137	192	192	115	115	178	178	156	156	178	178	213	213	127	127	222	222
	8301noP-Pop85	88	106	159	159	174	174	273	277	140	142	137	137	192	192	115	115	176	178	156	156	178	178	209	213	127	127	228	228
	8301noP-Pop86	88	106	159	159	174	178	273	277	144	144	137	137	192	192	115	115	178	180	140	156	178	178	213	213	125	127	222	228
	8301noP-Pop87	88	88	159	163	174	178	273	283	140	142	137	137	192	192	113	115	178	180	140	156	178	178	209	215	127	127	222	228
	8301noP-Pop88	92	106	159	163	174	178	273	273	140	142	137	137	192	192	113	115	178	180	156	156	176	178	209	215	127	127	222	228
	8301noP-Pop89	88	92	159	163	178	178	273	273	144	144	137	137	192	192	115	115	178	180	140	156	-9	-9	-9	-9	127	127	222	228
	8301noP-Pop90	88	92	159	165	174	186	273	277	140	142	137	137	192	192	115	115	178	180	140	156	178	178	213	213	127	127	220	222
	8301noP-Pop91	104	106	159	167	174	178	273	277	140	142	137	137	192	192	115	115	178	180	140	156	176	178	209	213	125	125	220	222
	8301noP-Pop92	92	106	159	159	178	178	273	277	140	142	137	137	188	192	113	115	178	180	140	156	-9	-9	209	215	127	127	220	228
	8301noP-Pop93	88	104	163	165	174	178	277	283	144	144	137	137	192	192	113	115	176	178	140	156	178	178	209	213	125	127	228	228
	8301noP-Pop94	92	92	165	167	178	178	273	273	144	144	137	137	192	192	113	115	178	180	140	156	178	178	209	213	127	127	222	222
	8301noP-Pop95	88	106	159	159	174	184	273	283	140	142	137	137	192	194	113	115	178	180	140	156	178	178	209	215	117	127	220	222
	8301noP-Pop96	88	92	159	159	178	178	277	277	144	144	137	137	192	194	115	115	178	180	156	156	178	178	209	213	117	127	220	228
	8301noP-Pop97	88	88	159	163	174	184	273	273	140	142	137	137	192	194	115	115	172	180	156	156	176	180	207	209	123	125	220	228
	8301noP-Pop98	88	88	159	165	178	178	277	277	144	144	137	137	192	194	115	115	180	180	140	156	178	178	209	213	117	127	228	228
	8301noP-Pop99	88	92	159	165	178	178	273	277	144	144	137	137	192	194	115	115	178	178	140	156	178	178	209	213	117	127	220	228
	8301noP-Pop100	-9	-9	159	167	178	188	273	273	140	142	137	137	192	194	113	115	180	180	140	156	-9	-9	207	215	125	127	220	222
	8301noP-Pop101	88	92	159	159	174	174	273	277	140	142	137	137	188	192	115	115	178	180	140	156	178	178	213	213	127	127	222	222
	8301noP-Pop102	92	104	159	159	174	178	277	283	140	142	137	137	188	192	115	115	178	180	156	156	178	178	213	213	117	127	222	228
	8301noP-Pop103	88	104	159	159	174	178	273	283	144	144	137	141	188	192	113	117	172	180	146	156	176	178	209	213	123	127	210	222
	8301noP-Pop104	88	92	159	159	178	178	273	277	144	144	137	137	188	192	115	115	178	178	140	156	178	178	209	215	119	127	220	220
	8301noP-Pop105	92	96	159	163	174	188	273	283	142	144	137	137	192	194	115	115	176	180	140	156	178	180	207	213	123	127	220	222
	8301noP-Pop106	88	92	159	159	178	186	277	277	144	156	137	137	188	192	115	115	178	178	140	146	178	178	209	213	119	127	220	228
	8301noP-Pop107	104	106	167	167	174	178	273	283	144	144	137	137	192	192	115	115	178	180	140	156	178	178	213	215	127	127	220	222
	8301noP-Pop108	88	88	159	163	174	186	273	277	142	156	137	137	188	192	113	115	180	180	156	156	178	178	213	213	117	127	220	228
	8301noP-Pop109	88	88	159	159	178	186	277	283	142	144	137	137	188	188	115	115	178	178	146	156	178	178	209	213	117	119	220	228
	8301noP-Pop110	92	92	159	159	178	178	277	283	144	144	137	137	192	192	115	115	178	180	154	154	178	178	209	213	119	127	220	222
	8301noP-Pop111	88	96	159	159	174	178	277	283	144	144	137	137	194	194	115	115	176	178	156	156	-9	-9	209	213	123	127	220	220
	8301noP-Pop112	88	106	165	167	174	178	273	277	144	156	137	137	188	192	115	115	178	180	140	140	-9	-9	209	213	117	125	222	222
	8301noP-Pop113	106	106	163	167	174	188	273	273	142	144	137	137	192	192	115	115	180	180	156	156	176	178	207	215	125	127	220	222
	8301noP-Pop114	88	88	159	163	174	178	273	277	144	156	137	137	192	192	115	115	178	180	146	156	178	178	213	213	119	127	228	228
	8301noP-Pop115	104	106	159	167	174	178	277	283	144	144	137	137	192	192	113	115	178	180	140	140	178	178	209	213	127	127	222	222
	8301noP-Pop116	88	92	159	159	174	178	273	283	144	156	137	137	192	192	115	115	180	180	156	156	178	178	209	213	125	127	222	222
	8301noP-Pop117	88	92	159	163	174	178	277	283	156	156	137	137	192	192	115	115	178	180	140	140	176	178	207	211	125	127	228	228
	8301noP-Pop118	88	106	159	159	178	186	277	283	142	142	137	137	188	192	115	115	180	180	156	156	176	178	207	213	117	127	220	222
	8301noP-Pop119	88	106	159	163	178	178	273	283	142	142	137	137	188	192	115	115	178	180	156	156	176	176	207	213	125	127	222	222
	8301noP-Pop120	88	96	163	163	178	188	273	283	142	144	137	137	192	194	115	115	176	178	140	140	176	180	207	211	123	125	222	228
	8301noP-Pop121	88	88	159	159	174	174	277	277	144	144	137	137	192	192	115	115	178	180	140	140	178	178	207	211	127	127	222	222
	8301noP-Pop122	92	92	165	167	178	188	273	273	142	156	137	137	192	194	115	115	178	180	156	156	178	178	207	211	113	127	208	222
	8301noP-Pop123	88	96	159	159	178	188	273	277	142	142	137	137	192	194	115	115	172	180	156	156	178	178	205	205	113	127	208	228
	8301noP-Pop124	92	106	159	159	174	178	277	283	142	156	137	137	188	192	113	115	178	180	156	156	178	178	207	207	115	127	228	228
	8301noP-Pop125	88	106	159	159	178	178	277	283	142	142	137	137	188	188	115	115	178	180	140	140	176	178	207	211	127	127	222	222
	8301noP-Pop126	88	88	159	163	174	188	273	283	142	144	137	137	192	194	115	115	-9	-9	-9	-9	178	178	205	211	123	127	-9	-9
	8301noP-Pop127	88	106	159	163	178	178	273	273	142	142	137	137	188	192	115	115	180	180	156	156	-9	-9	207	213	127	127	220	222
	8301noP-Pop128	88	96	159	159	178	184	273	277	142	142	137	137	192	192	115	115	176	178	156	156	178	178	205	205	119	127	220	222
	8301noP-Pop129	88	106	159	159	174	178	273	277	144	144	137	137	188	192	115	115	178	178	140	156	178	178	207	211	127	127	222	222
	8301noP-Pop130	92	92	159	159	174	188	277	283	144	156	137	137	192	194	115	115	176	180	156	156	178	180	207	211	115	123	222	228
	8301noP-Pop131	88	92	159	159	178	188	273	273	142	144	137	137	192	194	115	115	176	178	156	156	178	178	205	205	127	127	220	222
	8301noP-Pop132	88	88	163	163	174	178	283	283	144	156	137	137	192	192	113	115	178	180	140	156	176	178	207	213	125	125	228	228
	8301noP-Pop133	88	88	159	167	174	186	273	273	142	142	137	137	192	192	115	115	180	180	140	156	178	178	207	211	117	127	222	222
	8301noP-Pop134	88	92	159	167	178	186	273	273	142	156	137	137	192	192	115	115	178	180	156	156	176	178	207	207	119	127	222	222
	8301noP-Pop135	88	106	159	163	178	186	273	283	142	144	137	137	188	192	115	115	180	180	156	156	176	178	207	213	127	127	220	222
	8301noP-Pop136	92	92	159	163	174	178	277	283	142	156	137	137	192	192	113	115	180	180	156	156	178	178	207	207	-9	-9	222	228
	8301noP-Pop137	88	88	159	159	178	186	273	277	142	144	137	137	188	192	113	115	180	180	140	156	176	176	211	211	-9	-9	220	220
	8301noP-Pop138	88	88	159	159	178	186	277	283	142	144	137	137	188	188	113	115	178	178	146	156	178	178	207	211	-9	-9	220	228
	8301noP-Pop139	88	88	159	159	178	178	273	277	142	156	137	137	188	192	115	115	178	178	156	156	178	178	207	211	-9	-9	220	220
	8301noP-Pop141	92	106	159	163	178	178	273	277	142	142	137	137	188	192	115	115	176	178	140	156	178	178	207	211	-9	-9	222	222
	8301noP-Pop142	92	106	159	165	174	178	277	277	144	144	137	137	188	192	115	115	178	180	156	156	178	178	211	213	-9	-9	228	228
	8301noP-Pop143	106	106	159	159	178	178	277	283	142	142	137	137	188	188	113	115	178	180	156	156	178	178	207	211	-9	-9	220	222
	8301noP-Pop144	106	106	159	159	178	178	273	277	142	144	137	137	188	194	115	115	178	178	138	146	178	178	207	211	-9	-9	222	228
	8301noP-Pop145	106	106	159	159	178	178	273	277	142	144	137	137	188	192	115	115	178	180	156	156	176	178	207	211	-9	-9	220	228
	8301noP-Pop146	88	96	159	163	174	178	283	283	156	156	137	141	192	194	115	115	180	180	156	156	178	180	205	211	-9	-9	222	228
	8301noP-Pop147	88	88	159	165	174	178	273	283	142	156	137	137	192	194	115	115	178	180	140	156	176	178	207	213	-9	-9	228	228
	8301noP-Pop148	92	96	159	163	174	188	273	283	142	144	137	137	192	194	115	115	178	180	140	156	178	178	211	211	-9	-9	226	228
	8301noP-Pop149	88	92	159	165	174	178	273	277	144	144	137	137	192	194	113	115	180	180	156	156	178	178	211	211	-9	-9	220	228
	8301noP-Pop150	88	92	159	165	174	178	273	277	144	144	137	137	192	192	115	115	178	180	140	156	178	178	207	211	-9	-9	222	222
	8301noP-Pop151	88	92	159	159	174	178	273	277	142	144	137	137	192	192	115	115	178	180	140	156	178	178	207	207	-9	-9	220	222
	8301noP-Pop152	88	92	159	159	174	174	277	283	144	156	137	137	192	192	113	115	180	180	140	156	178	178	207	207	-9	-9	222	222
	8301noP-Pop153	88	92	159	163	178	178	273	283	144	156	137	137	192	192	115	115	178	180	140	156	178	178	207	211	-9	-9	222	222
	8301noP-Pop154	88	92	159	167	178	178	277	277	142	144	137	137	192	192	113	115	178	180	156	156	178	178	207	211	-9	-9	220	222
	8301noP-Pop155	88	92	159	163	178	178	273	273	142	158	137	137	192	192	115	115	178	180	156	156	-9	-9	207	211	-9	-9	226	228
	8301noP-Pop156	88	92	159	163	178	178	273	277	142	158	137	137	192	192	115	115	178	180	140	156	176	178	207	207	-9	-9	220	222
	8301noP-Pop157	88	92	159	159	178	178	273	277	142	142	137	137	192	192	115	115	178	180	156	156	178	178	211	211	-9	-9	228	228
	8301noP-Pop158	88	92	159	159	178	178	273	283	142	142	137	137	192	192	-9	-9	180	180	140	156	178	178	207	207	-9	-9	222	222
	8301noP-Pop159	88	92	159	159	178	186	273	277	144	144	137	137	192	192	113	115	178	180	140	146	178	178	207	211	-9	-9	222	228
	8301noP-Pop160	88	92	159	159	174	186	273	273	142	142	137	137	188	192	115	115	178	180	156	156	178	178	207	211	-9	-9	222	222
	8301noP-Pop161	88	88	159	159	178	178	273	273	142	142	137	137	192	194	113	115	178	180	156	156	176	178	207	207	-9	-9	220	222
	8301noP-Pop162	88	92	159	159	178	188	273	273	142	142	137	137	192	194	115	115	176	178	156	156	178	178	205	205	-9	-9	220	222
	8301noP-Pop163	88	96	159	159	178	188	273	277	142	142	137	137	192	194	115	117	172	180	156	156	178	178	205	205	-9	-9	208	228
	8301noP-Pop164	88	88	159	167	178	178	273	283	142	142	137	137	188	192	115	115	178	180	156	156	-9	-9	207	207	-9	-9	222	222
	8301noP-Pop165	88	88	159	163	178	178	273	273	142	142	137	137	188	192	115	115	180	180	156	156	176	178	207	213	-9	-9	218	222
	8301noP-Pop166	92	96	159	165	174	188	273	273	142	156	137	141	188	194	115	115	176	180	156	156	178	180	205	207	-9	-9	-9	-9
	8301noP-Pop167	92	96	159	165	174	188	273	273	142	156	137	137	188	194	115	115	172	176	156	156	178	178	205	207	-9	-9	208	228
	8301noP-Pop168	88	88	159	163	174	188	273	277	144	144	137	137	192	194	113	115	178	178	140	156	178	178	211	211	-9	-9	208	222
	8301noP-Pop169	92	106	159	167	178	178	273	277	142	142	137	137	192	192	113	115	178	180	140	140	-9	-9	207	207	-9	-9	220	222
	8301noP-Pop170	88	106	159	163	178	178	273	283	142	142	137	141	188	192	113	115	178	180	140	156	178	178	205	207	-9	-9	208	222
	8301noP-Pop171	88	88	163	165	178	178	273	283	156	156	137	137	192	192	115	115	178	180	140	156	178	178	211	211	-9	-9	222	228
	8301noP-Pop172	88	104	159	165	174	178	273	283	142	144	137	137	-9	-9	115	115	178	180	140	156	178	178	207	211	-9	-9	220	222
	8301noP-Pop173	88	104	159	165	174	186	273	283	144	144	-9	-9	192	192	115	115	178	180	140	156	178	178	207	211	-9	-9	222	228
	8301noP-Pop175	88	106	159	159	178	178	277	283	144	156	137	137	186	186	113	113	180	180	140	156	178	180	211	213	-9	-9	220	228
	8301noP-Pop176	-9	-9	159	167	178	178	269	277	142	162	137	137	188	194	107	115	174	180	140	156	178	180	207	209	-9	-9	220	228
	8301noP-Pop177	88	106	163	167	178	178	273	283	142	156	137	137	192	192	113	115	178	178	140	146	178	178	207	211	-9	-9	222	228
	8301noP-Pop178	88	104	159	159	178	178	273	277	144	156	137	137	192	192	115	115	178	180	140	156	178	178	211	211	-9	-9	222	228
	8301noP-Pop179	88	106	159	159	178	186	277	277	144	144	137	137	188	188	113	115	178	180	156	156	176	178	207	211	-9	-9	220	228
	8301noP-Pop180	88	106	159	163	178	178	273	277	142	156	141	141	192	192	115	115	179	179	138	156	178	178	207	213	-9	-9	222	222
	8301noP-Pop181	88	106	159	163	178	186	273	273	142	144	137	137	188	188	113	115	178	180	140	156	178	178	207	207	-9	-9	220	222
	8301noP-Pop182	88	106	159	165	178	178	273	273	142	142	137	137	192	192	115	115	178	180	140	140	176	178	207	207	-9	-9	222	222
	8301noP-Pop183	88	92	159	159	174	186	273	273	142	142	135	139	186	192	113	115	-9	-9	156	156	-9	-9	207	211	-9	-9	220	224
	8301noP-Pop184	88	96	159	159	174	188	277	277	142	142	137	137	188	192	-9	-9	172	178	156	156	178	178	205	207	-9	-9	222	222
	8301noP-Pop185	92	106	-9	-9	-9	-9	273	277	134	134	129	129	190	190	113	115	178	180	140	140	174	174	207	207	-9	-9	220	222
	8301noP-Pop186	88	106	165	165	178	186	273	283	142	144	137	137	192	192	115	115	-9	-9	140	156	-9	-9	207	211	-9	-9	222	222
	8301noP-Pop187	88	88	159	159	178	188	273	273	144	156	137	137	192	194	115	115	172	179	-9	-9	178	178	207	211	-9	-9	222	228
	8301noP-Pop188	-9	-9	159	165	178	186	273	273	144	144	137	137	192	192	115	115	178	180	140	140	176	176	-9	-9	-9	-9	222	222
	8301noP-Pop189	88	88	-9	-9	-9	-9	273	273	142	142	129	129	184	190	115	115	180	180	138	156	176	178	207	213	-9	-9	220	222
	8301noP-Pop190	88	96	-9	-9	-9	-9	277	277	134	134	129	129	184	190	117	117	172	178	156	156	178	178	205	207	-9	-9	222	228
	8301noP-Pop194	88	92	159	163	178	178	273	273	142	144	137	137	188	188	115	115	180	182	140	156	176	178	207	211	-9	-9	222	222
	8301noP-Pop195	88	106	159	159	178	178	273	277	142	144	137	137	192	194	115	115	178	180	140	156	178	178	207	213	-9	-9	222	222
	8301noP-Pop196	88	88	159	159	178	186	273	273	142	142	137	137	192	194	115	115	178	180	156	156	178	178	207	213	-9	-9	222	228
	8301noP-Pop197	92	106	159	159	174	178	273	277	142	156	137	137	188	192	115	115	178	180	156	156	178	178	207	211	-9	-9	220	222
	8301noP-Pop198	88	106	159	165	178	178	273	273	142	142	137	137	188	192	113	115	178	180	156	156	176	178	207	213	-9	-9	220	220
	8301noP-Pop199	106	106	159	163	174	178	273	273	142	144	137	141	192	194	-9	-9	180	180	156	156	176	178	205	211	-9	-9	-9	-9
	8301noP-Pop200	88	92	159	159	-9	-9	273	273	142	142	137	137	192	192	115	115	178	180	156	156	178	178	205	205	-9	-9	220	222
	8301noP-Pop202	88	92	159	159	174	186	273	273	146	146	141	141	188	192	115	115	178	180	156	156	178	178	207	211	-9	-9	222	222
	8301noP-Pop203	88	88	159	159	178	178	273	273	142	144	137	137	192	192	115	115	172	180	140	156	-9	-9	205	207	-9	-9	218	220
	8301noP-Pop204	-9	-9	159	159	178	178	273	283	144	144	137	137	188	192	115	115	178	178	140	140	178	178	207	213	-9	-9	220	222
	8301noP-Pop205	88	96	163	163	174	188	273	283	144	156	137	137	192	194	113	115	178	180	140	156	-9	-9	207	211	-9	-9	222	228

## Sheet: 3pops-high_AFP
Allele Frequencies by Population for Codominant Data
Data Sheet	3pops-high
Data Title	SouthBP-Cockburn-BP-Genalex
No. Loci	14
No. Samples	906
No. Pops.	3
Allele Frequencies and Sample Size by Populations
Locus	Allele/n	SouthBP	4400noP	8301noP			Allele/n	SouthBP	4400noP	8301noP
G10J	N	637	56	199
	86	0.00392	0.14286	0			86	0.00392	0.14286	0
	88	0.29435	0.33929	0.45226			88	0.29435	0.33929	0.45226
	90	0.0157	0.01786	0			90	0.0157	0.01786	0
	92	0.02904	0.05357	0.21357			92	0.02904	0.05357	0.21357
	94	0.02119	0.00893	0			94	0.02119	0.00893	0
	96	0.05416	0.04464	0.06281			96	0.05416	0.04464	0.06281
	98	0.03925	0.11607	0			98	0.03925	0.11607	0
	100	0.12245	0.27679	0			100	0.12245	0.27679	0
	102	0.01648	0	0			102	0.01648	0	0
	104	0.24568	0	0.04774			104	0.24568	0	0.04774
	106	0.09184	0	0.22362			106	0.09184	0	0.22362
	108	0.05965	0	0			108	0.05965	0	0
	110	0.00628	0	0			110	0.00628	0	0
G10B	N	635	55	196
	153	0.00079	0	0			153	0.00079	0	0
	155	0.02677	0.1	0			155	0.02677	0.1	0
	157	0.03543	0.00909	0			157	0.03543	0.00909	0
	159	0.38976	0.55455	0.58673			159	0.38976	0.55455	0.58673
	161	0.1189	0	0			161	0.1189	0	0
	163	0.21181	0.21818	0.20663			163	0.21181	0.21818	0.20663
	165	0.05197	0	0.1148			165	0.05197	0	0.1148
	167	0.15669	0.11818	0.09184			167	0.15669	0.11818	0.09184
	169	0.00787	0	0			169	0.00787	0	0
G1D	N	635	55	197
	174	0.04252	0.11818	0.26396			174	0.04252	0.11818	0.26396
	176	0.04567	0.15455	0.00254			176	0.04567	0.15455	0.00254
	178	0.28583	0.13636	0.55076			178	0.28583	0.13636	0.55076
	180	0.18031	0	0			180	0.18031	0	0
	182	0.05669	0	0			182	0.05669	0	0
	184	0.08268	0.22727	0.03046			184	0.08268	0.22727	0.03046
	186	0.17638	0.3	0.06853			186	0.17638	0.3	0.06853
	188	0.1189	0	0.08376			188	0.1189	0	0.08376
	190	0.01024	0.06364	0			190	0.01024	0.06364	0
	192	0.00079	0	0			192	0.00079	0	0
G10H	N	617	56	199
	259	0.00891	0	0			259	0.00891	0	0
	263	0.00972	0	0			263	0.00972	0	0
	265	0.08347	0.05357	0			265	0.08347	0.05357	0
	267	0.02188	0.16964	0			267	0.02188	0.16964	0
	269	0.0859	0	0.00251			269	0.0859	0	0.00251
	271	0.07374	0.08929	0			271	0.07374	0.08929	0
	273	0.26985	0.11607	0.55276			273	0.26985	0.11607	0.55276
	275	0.05267	0.07143	0			275	0.05267	0.07143	0
	277	0.02512	0	0.24623			277	0.02512	0	0.24623
	279	0.05997	0	0			279	0.05997	0	0
	281	0.04376	0	0			281	0.04376	0	0
	283	0.04538	0	0.19849			283	0.04538	0	0.19849
	285	0.04781	0	0			285	0.04781	0	0
	287	0.02917	0.02679	0			287	0.02917	0.02679	0
	289	0.02512	0.41071	0			289	0.02512	0.41071	0
	291	0.02836	0	0			291	0.02836	0	0
	293	0.04376	0	0			293	0.04376	0	0
	295	0.0235	0	0			295	0.0235	0	0
	297	0.00486	0	0			297	0.00486	0	0
	299	0.01216	0	0			299	0.01216	0	0
	301	0.00081	0.0625	0			301	0.00081	0.0625	0
	303	0.00324	0	0			303	0.00324	0	0
	307	0.00081	0	0			307	0.00081	0	0
G10L	N	630	56	200
	132	0.01349	0.01786	0			132	0.01349	0.01786	0
	134	0	0	0.01			134	0	0	0.01
	136	0.00159	0	0			136	0.00159	0	0
	138	0.11984	0.0625	0			138	0.11984	0.0625	0
	140	0.16587	0.26786	0.095			140	0.16587	0.26786	0.095
	142	0.14365	0.33036	0.4125			142	0.14365	0.33036	0.4125
	144	0.01905	0.01786	0.3325			144	0.01905	0.01786	0.3325
	146	0.0373	0	0.005			146	0.0373	0	0.005
	148	0.00556	0	0			148	0.00556	0	0
	150	0.00079	0	0			150	0.00079	0	0
	152	0.09524	0.00893	0			152	0.09524	0.00893	0
	154	0.06746	0.11607	0			154	0.06746	0.11607	0
	156	0.10317	0.15179	0.1375			156	0.10317	0.15179	0.1375
	158	0.08492	0.01786	0.005			158	0.08492	0.01786	0.005
	160	0.02937	0	0			160	0.02937	0	0
	162	0.06825	0	0.0025			162	0.06825	0	0.0025
	164	0.01587	0	0			164	0.01587	0	0
	166	0.01111	0.00893	0			166	0.01111	0.00893	0
	168	0.00238	0	0			168	0.00238	0	0
	170	0.0119	0	0			170	0.0119	0	0
	172	0.00317	0	0			172	0.00317	0	0
MU05	N	637	56	201
	129	0	0	0.01493			129	0	0	0.01493
	131	0.00078	0.0625	0			131	0.00078	0.0625	0
	133	0.06122	0.1875	0.00249			133	0.06122	0.1875	0.00249
	135	0.02747	0.08036	0.00249			135	0.02747	0.08036	0.00249
	137	0.41052	0.09821	0.93035			137	0.41052	0.09821	0.93035
	139	0.15071	0.22321	0.00249			139	0.15071	0.22321	0.00249
	141	0.25039	0.33929	0.04478			141	0.25039	0.33929	0.04478
	143	0.03846	0	0			143	0.03846	0	0
	145	0.00863	0	0			145	0.00863	0	0
	147	0.03218	0.00893	0			147	0.03218	0.00893	0
	151	0.01256	0	0			151	0.01256	0	0
	153	0.00706	0	0.00249			153	0.00706	0	0.00249
G1A	N	629	56	201
	180	0.00715	0	0			180	0.00715	0	0
	184	0.00318	0	0.00498			184	0.00318	0	0.00498
	186	0.05167	0	0.01741			186	0.05167	0	0.01741
	188	0.03021	0	0.20647			188	0.03021	0	0.20647
	190	0.25119	0.33929	0.00995			190	0.25119	0.33929	0.00995
	192	0.16455	0.34821	0.59204			192	0.16455	0.34821	0.59204
	194	0.40461	0.05357	0.16915			194	0.40461	0.05357	0.16915
	196	0.05644	0.09821	0			196	0.05644	0.09821	0
	198	0.02067	0.16071	0			198	0.02067	0.16071	0
	200	0.00159	0	0			200	0.00159	0	0
	202	0.00874	0	0			202	0.00874	0	0
G10C	N	645	52	200
	101	0.01008	0.00962	0			101	0.01008	0.00962	0
	103	0.00155	0	0			103	0.00155	0	0
	105	0.05969	0	0			105	0.05969	0	0
	107	0.05736	0	0.0025			107	0.05736	0	0.0025
	109	0.01938	0	0			109	0.01938	0	0
	111	0.07674	0.02885	0.005			111	0.07674	0.02885	0.005
	113	0.14651	0.00962	0.1625			113	0.14651	0.00962	0.1625
	115	0.33256	0.89423	0.7975			115	0.33256	0.89423	0.7975
	117	0.25271	0.05769	0.0325			117	0.25271	0.05769	0.0325
	119	0.04031	0	0			119	0.04031	0	0
	121	0.00078	0	0			121	0.00078	0	0
	123	0.00155	0	0			123	0.00155	0	0
	127	0.00078	0	0			127	0.00078	0	0
G10U	N	645	55	200
	166	0.00078	0	0			166	0.00078	0	0
	168	0.00233	0	0			168	0.00233	0	0
	172	0.02248	0	0.055			172	0.02248	0	0.055
	174	0.11783	0	0.0025			174	0.11783	0	0.0025
	176	0.22326	0.29091	0.0525			176	0.22326	0.29091	0.0525
	178	0.43798	0.11818	0.4025			178	0.43798	0.11818	0.4025
	179	0	0	0.0075			179	0	0	0.0075
	180	0.16744	0.58182	0.4775			180	0.16744	0.58182	0.4775
	182	0.02171	0.00909	0.0025			182	0.02171	0.00909	0.0025
	184	0.0062	0	0			184	0.0062	0	0
G10X	N	635	53	201
	120	0.00472	0	0			120	0.00472	0	0
	122	0.0063	0	0			122	0.0063	0	0
	124	0.00236	0	0			124	0.00236	0	0
	126	0.00472	0	0			126	0.00472	0	0
	128	0.02835	0	0			128	0.02835	0	0
	132	0.00866	0	0			132	0.00866	0	0
	134	0.01181	0	0			134	0.01181	0	0
	136	0.00551	0	0			136	0.00551	0	0
	138	0.1126	0.10377	0.01741			138	0.1126	0.10377	0.01741
	140	0.27087	0.06604	0.31841			140	0.27087	0.06604	0.31841
	142	0.04803	0	0			142	0.04803	0	0
	144	0.03858	0	0			144	0.03858	0	0
	146	0.05039	0	0.0199			146	0.05039	0	0.0199
	148	0.11732	0.04717	0			148	0.11732	0.04717	0
	150	0.03386	0.24528	0			150	0.03386	0.24528	0
	152	0.03937	0.0566	0			152	0.03937	0.0566	0
	154	0.03858	0	0.00995			154	0.03858	0	0.00995
	156	0.09606	0.48113	0.63433			156	0.09606	0.48113	0.63433
	158	0.08031	0	0			158	0.08031	0	0
	160	0.00079	0	0			160	0.00079	0	0
	220	0.00079	0	0			220	0.00079	0	0
MSUT6	N	619	52	188
	166	0.01696	0	0			166	0.01696	0	0
	170	0.00727	0	0			170	0.00727	0	0
	172	0.06866	0	0			172	0.06866	0	0
	174	0.16963	0	0.00532			174	0.16963	0	0.00532
	176	0.09289	0	0.16755			176	0.09289	0	0.16755
	178	0.51535	0.38462	0.75798			178	0.51535	0.38462	0.75798
	180	0.09047	0.26923	0.06649			180	0.09047	0.26923	0.06649
	182	0.03796	0.34615	0.00266			182	0.03796	0.34615	0.00266
	184	0.00081	0	0			184	0.00081	0	0
G10M	N	634	54	199
	203	0.00315	0	0			203	0.00315	0	0
	205	0.0836	0.12037	0.05276			205	0.0836	0.12037	0.05276
	207	0.08596	0.35185	0.26382			207	0.08596	0.35185	0.26382
	209	0.11041	0.37037	0.24121			209	0.11041	0.37037	0.24121
	211	0.20347	0.07407	0.13317			211	0.20347	0.07407	0.13317
	213	0.26814	0.08333	0.26131			213	0.26814	0.08333	0.26131
	215	0.08991	0	0.04774			215	0.08991	0	0.04774
	217	0.12539	0	0			217	0.12539	0	0
	219	0.02918	0	0			219	0.02918	0	0
	221	0.00079	0	0			221	0.00079	0	0
MU59	N	642	0	139
	113	0.05685	0	0.04317			113	0.05685	0	0.04317
	115	0.08723	0	0.01799			115	0.08723	0	0.01799
	117	0.07788	0	0.09712			117	0.07788	0	0.09712
	119	0.17835	0	0.03237			119	0.17835	0	0.03237
	121	0.26402	0	0			121	0.26402	0	0
	123	0.11916	0	0.07554			123	0.11916	0	0.07554
	125	0.1285	0	0.14748			125	0.1285	0	0.14748
	127	0.07243	0	0.58633			127	0.07243	0	0.58633
	129	0.01402	0	0			129	0.01402	0	0
	130	0.00156	0	0			130	0.00156	0	0
MU50	N	631	54	200
	198	0.00158	0	0			198	0.00158	0	0
	200	0.02773	0	0			200	0.02773	0	0
	204	0.00317	0.32407	0			204	0.00317	0.32407	0
	206	0.12044	0	0			206	0.12044	0	0
	208	0.17274	0.36111	0.015			208	0.17274	0.36111	0.015
	210	0.04834	0.00926	0.0325			210	0.04834	0.00926	0.0325
	211	0.00158	0	0			211	0.00158	0	0
	212	0.09113	0	0			212	0.09113	0	0
	214	0.01585	0.00926	0			214	0.01585	0.00926	0
	216	0.00713	0	0			216	0.00713	0	0
	218	0.04517	0.13889	0.005			218	0.04517	0.13889	0.005
	220	0.17829	0.15741	0.2075			220	0.17829	0.15741	0.2075
	222	0.10618	0	0.49			222	0.10618	0	0.49
	224	0.05151	0	0.0025			224	0.05151	0	0.0025
	226	0.05784	0	0.005			226	0.05784	0	0.005
	228	0.04913	0	0.2425			228	0.04913	0	0.2425
	230	0.02139	0	0			230	0.02139	0	0
	232	0.00079	0	0			232	0.00079	0	0
							Avg	0.0736837	0.0684211	0.0736844
								47.6733	3.83158	14.9579
Warning! Results should be treated with caution given the following:
There is 7% missing data at the locus 'G10C' in the population '4400noP!
There is 7% missing data at the locus 'MSUT6' in the population '4400noP!
There is 7% missing data at the locus 'MSUT6' in the population '8301noP!
There is 100% missing data at the locus 'MU59' in the population '4400noP!
There is 31% missing data at the locus 'MU59' in the population '8301noP!

## Sheet: 3pops-high_PAS
Summary of Private Alleles by Population
Data Sheet	3pops-high
Data Title	SouthBP-Cockburn-BP-Genalex
No. Loci	14
No. Samples	906
No. Pops.	3
Pop	Locus	Allele	Freq
SouthBP	G10J	102	0.0164835
SouthBP	G10J	108	0.0596546
SouthBP	G10J	110	0.00627943
SouthBP	G10B	153	0.000787402
SouthBP	G10B	161	0.118898
SouthBP	G10B	169	0.00787402
SouthBP	G1D	180	0.180315
SouthBP	G1D	182	0.0566929
SouthBP	G1D	192	0.000787402
SouthBP	G10H	259	0.0089141
SouthBP	G10H	263	0.00972447
SouthBP	G10H	279	0.0599676
SouthBP	G10H	281	0.0437601
SouthBP	G10H	285	0.047812
SouthBP	G10H	291	0.028363
SouthBP	G10H	293	0.0437601
SouthBP	G10H	295	0.0235008
SouthBP	G10H	297	0.00486224
SouthBP	G10H	299	0.0121556
SouthBP	G10H	303	0.00324149
SouthBP	G10H	307	0.000810373
SouthBP	G10L	136	0.0015873
SouthBP	G10L	148	0.00555556
SouthBP	G10L	150	0.000793651
SouthBP	G10L	160	0.0293651
SouthBP	G10L	164	0.015873
SouthBP	G10L	168	0.00238095
SouthBP	G10L	170	0.0119048
SouthBP	G10L	172	0.0031746
SouthBP	MU05	143	0.0384615
SouthBP	MU05	145	0.00863422
SouthBP	MU05	151	0.0125589
SouthBP	G1A	180	0.00715421
SouthBP	G1A	200	0.00158983
SouthBP	G1A	202	0.00874404
SouthBP	G10C	103	0.00155039
SouthBP	G10C	105	0.0596899
SouthBP	G10C	109	0.0193798
SouthBP	G10C	119	0.0403101
SouthBP	G10C	121	0.000775194
SouthBP	G10C	123	0.00155039
SouthBP	G10C	127	0.000775194
SouthBP	G10U	166	0.000775194
SouthBP	G10U	168	0.00232558
SouthBP	G10U	184	0.00620155
SouthBP	G10X	120	0.00472441
SouthBP	G10X	122	0.00629921
SouthBP	G10X	124	0.0023622
SouthBP	G10X	126	0.00472441
SouthBP	G10X	128	0.0283465
SouthBP	G10X	132	0.00866142
SouthBP	G10X	134	0.011811
SouthBP	G10X	136	0.00551181
SouthBP	G10X	142	0.0480315
SouthBP	G10X	144	0.0385827
SouthBP	G10X	158	0.080315
SouthBP	G10X	160	0.000787402
SouthBP	G10X	220	0.000787402
SouthBP	MSUT6	166	0.0169628
SouthBP	MSUT6	170	0.00726979
SouthBP	MSUT6	172	0.0686591
SouthBP	MSUT6	184	0.000807754
SouthBP	G10M	203	0.00315457
SouthBP	G10M	217	0.125394
SouthBP	G10M	219	0.0291798
SouthBP	G10M	221	0.000788644
SouthBP	MU59	121	0.264019
SouthBP	MU59	129	0.0140187
SouthBP	MU59	130	0.00155763
SouthBP	MU50	198	0.00158479
SouthBP	MU50	200	0.0277338
SouthBP	MU50	206	0.120444
SouthBP	MU50	211	0.00158479
SouthBP	MU50	212	0.0911252
SouthBP	MU50	216	0.00713154
SouthBP	MU50	230	0.0213946
SouthBP	MU50	232	0.000792393
8301noP	G10L	134	0.01
8301noP	MU05	129	0.0149254
8301noP	G10U	179	0.0075

## Sheet: BlackBear-ON
Indiv	Pop	G10J		G10B		G1D		G10H		G10L		MU05		G1A		G10C		G10U		G10X		MSUT6		G10M		MU59		MU50
SE-ON1	SE-ON	106	106	159	159	178	180	273	293	152	156	137	139	190	190	115	117	178	180	140	156	172	174	207	213	121	123	210	220
SE-ON2	SE-ON	100	100	159	159	178	184	273	283	138	140	137	137	190	192	115	117	178	180	142	156	178	182	207	209	115	123	222	226
SE-ON3	SE-ON	90	102	163	165	180	188	269	293	144	158	137	137	190	190	113	115	180	180	140	140	178	180	211	211	121	123	222	226
SE-ON4	SE-ON	92	98	159	159	174	182	273	293	140	142	135	137	188	190	101	115	178	178	140	140	174	178	211	217	121	121	220	222
SE-ON5	SE-ON	90	96	167	167	176	190	273	273	140	152	141	143	190	192	115	115	174	178	128	138	178	178	213	213	117	121	208	212
SE-ON6	SE-ON	88	94	161	161	178	188	269	273	146	146	139	141	190	190	113	115	178	178	140	146	174	178	211	213	115	125	206	208
SE-ON7	SE-ON	100	108	159	163	178	180	273	281	140	142	137	141	190	192	113	115	176	178	140	146	178	178	213	215	117	123	206	224
SE-ON8	SE-ON	106	108	163	167	174	180	271	275	142	158	133	135	186	194	117	117	180	180	138	156	178	182	205	213	113	127	208	214
SE-ON9	SE-ON	88	106	159	161	178	186	271	271	138	152	141	147	192	194	113	115	178	178	150	156	176	180	211	217	119	125	206	226
SE-ON10	SE-ON	96	100	159	159	178	180	267	293	154	156	137	141	184	190	111	115	178	180	138	158	170	178	211	213	119	123	208	220
SE-ON11	SE-ON	104	104	159	159	178	186	283	283	156	158	137	137	186	196	107	117	176	178	150	150	174	178	205	217	119	121	224	228
SE-ON12	SE-ON	90	90	159	163	180	184	265	283	140	156	137	137	190	194	113	115	176	180	144	148	178	180	207	217	121	121	206	208
SE-ON13	SE-ON	96	100	155	159	178	186	273	283	138	152	141	147	184	188	113	117	174	180	142	144	174	182	211	215	119	121	206	222
SE-ON14	SE-ON	104	106	159	163	178	188	281	307	142	146	139	141	190	192	113	113	178	178	140	156	174	178	205	215	115	115	208	226
SE-ON15	SE-ON	88	96	159	167	178	184	271	275	142	144	137	141	186	192	117	117	178	180	140	142	174	182	205	217	115	127	206	222
SE-ON16	SE-ON	104	104	159	159	178	184	265	273	154	158	137	137	192	192	109	109	180	180	136	140	178	182	205	213	119	125	208	220
SE-ON17	SE-ON	88	106	161	163	178	178	273	283	138	142	137	139	190	194	111	117	178	180	138	140	174	178	217	219	119	123	206	218
SE-ON18	SE-ON	104	104	163	163	178	178	269	293	152	156	139	145	190	190	117	117	174	180	128	140	174	174	219	219	123	127	218	222
SE-ON19	SE-ON	88	106	163	163	178	188	265	273	158	162	139	139	192	194	107	115	178	178	134	148	178	178	211	211	117	123	208	212
SE-ON20	SE-ON	98	106	155	167	184	188	287	293	152	156	137	137	188	194	113	117	178	180	144	148	174	178	207	213	115	119	206	220
SE-ON21	SE-ON	98	104	161	161	178	186	269	283	146	156	137	147	186	194	115	117	176	178	150	152	174	178	205	217	119	121	212	224
SE-ON22	SE-ON	104	106	161	163	184	188	289	293	140	152	137	147	190	194	111	117	178	180	140	156	178	178	205	209	115	123	200	212
SE-ON23	SE-ON	88	92	155	159	178	188	277	281	140	142	137	141	192	194	113	113	174	178	120	156	178	178	205	207	113	115	206	208
SE-ON24	SE-ON	104	106	163	163	178	186	271	273	142	156	137	137	190	192	101	115	176	178	140	152	178	178	205	209	123	127	208	214
SE-ON25	SE-ON	96	106	167	167	184	188	273	273	140	152	137	137	190	192	105	115	176	178	134	152	166	174	209	217	119	123	206	212
SE-ON26	SE-ON	98	104	159	161	178	182	271	299	142	160	133	137	190	192	117	117	178	180	138	158	172	182	207	211	121	127	222	224
SE-ON27	SE-ON	88	100	161	167	176	178	283	291	142	152	139	141	188	190	107	111	174	174	138	142	172	178	213	215	119	121	212	228
SE-ON28	SE-ON	104	106	161	167	180	180	273	291	140	156	137	137	190	192	113	119	174	180	150	156	178	182	213	217	119	125	208	226
SE-ON29	SE-ON	88	94	159	161	178	188	269	273	146	156	137	139	190	190	107	115	178	178	146	150	174	178	211	213	119	121	206	208
SE-ON30	SE-ON	104	106	159	161	180	184	273	291	140	156	137	137	190	192	113	115	174	180	150	156	178	182	213	217	119	121	208	208
SE-ON31	SE-ON	104	106	163	167	174	178	269	271	142	156	133	135	186	190	117	117	180	180	138	140	174	178	213	219	113	127	208	214
SE-ON32	SE-ON	88	104	-9	-9	178	186	287	291	152	156	141	151	192	194	-9	-9	178	180	146	150	172	176	207	213	119	121	220	222
SE-ON33	SE-ON	88	106	163	163	180	182	265	289	138	140	141	141	194	194	117	117	176	178	144	152	174	180	205	209	121	125	206	212
SE-ON34	SE-ON	88	88	159	163	186	188	273	281	140	142	137	143	194	198	101	117	176	178	146	146	174	178	205	207	119	127	208	226
SE-ON35	SE-ON	96	100	159	163	176	178	273	303	138	158	139	141	188	190	105	111	180	182	146	156	172	178	215	219	119	121	208	212
SE-ON36	SE-ON	100	104	163	165	184	186	269	275	138	154	137	141	202	202	105	107	176	180	148	156	174	174	213	217	115	125	208	222
SE-ON37	SE-ON	88	94	-9	-9	180	190	281	289	138	146	139	143	186	198	105	107	178	178	146	154	174	182	207	209	113	119	-9	-9
SE-ON38	SE-ON	100	100	159	163	182	186	265	283	138	140	139	139	190	194	107	111	174	178	128	146	178	178	205	213	113	119	200	208
SE-ON39	SE-ON	88	96	159	165	178	186	271	273	140	142	137	143	198	200	109	119	178	178	-9	-9	178	178	205	207	119	127	208	224
SE-ON40	SE-ON	88	88	163	163	180	182	265	273	138	152	137	141	192	194	107	117	178	178	144	148	174	174	205	213	119	121	208	212
SE-ON41	SE-ON	90	106	161	167	184	188	269	273	140	162	137	141	190	190	107	115	174	176	138	142	174	178	211	215	119	121	206	220
SE-ON42	SE-ON	100	108	163	167	178	180	273	289	140	156	137	137	188	190	105	115	178	178	150	150	178	182	211	213	113	125	208	210
SE-ON43	SE-ON	88	104	159	163	178	180	273	281	140	158	139	147	194	194	105	113	176	180	154	156	172	180	207	211	123	125	200	222
SE-ON44	SE-ON	96	104	159	163	180	180	267	273	132	156	137	141	184	184	105	111	178	180	138	152	170	178	213	217	119	123	206	208
SE-ON45	SE-ON	88	100	161	163	178	180	269	273	152	152	137	137	192	192	107	117	178	178	148	156	174	178	205	213	117	119	-9	-9
SE-ON46	SE-ON	88	96	157	159	178	184	285	285	156	162	139	143	198	200	117	119	178	178	138	156	170	178	205	207	115	119	-9	-9
SE-ON47	SE-ON	88	100	159	161	178	188	273	295	142	156	137	139	190	194	115	117	178	178	142	156	178	178	215	219	113	119	210	220
SE-ON48	SE-ON	90	100	155	163	178	186	269	289	140	156	137	137	192	194	105	115	178	180	140	144	174	178	209	213	119	121	208	224
SE-ON49	SE-ON	88	106	163	165	180	182	265	265	138	140	137	141	194	194	117	117	176	178	144	152	174	180	205	209	121	125	206	212
SE-ON50	SE-ON	100	100	163	163	184	186	269	273	154	156	141	141	190	202	105	115	174	180	156	156	174	174	205	217	119	125	220	222
SE-ON51	SE-ON	100	106	159	159	186	190	263	283	138	140	139	139	196	196	113	117	178	180	134	140	-9	-9	209	211	119	121	210	228
SE-ON52	SE-ON	94	96	159	163	178	180	275	293	146	158	135	139	186	194	105	113	178	180	146	146	178	180	211	211	113	113	210	228
SE-ON53	SE-ON	96	104	159	159	178	182	273	293	158	158	135	137	190	194	113	117	178	180	156	156	178	178	207	211	113	119	206	228
SE-ON54	SE-ON	104	106	159	159	182	188	267	293	158	158	135	137	190	194	117	117	174	180	148	156	178	182	211	213	119	121	206	218
SE-ON55	SE-ON	88	106	163	167	178	180	269	273	152	158	137	139	186	196	113	115	178	180	-9	-9	-9	-9	207	211	121	125	220	222
SE-ON56	SE-ON	96	96	159	167	178	178	275	285	154	156	137	141	190	194	117	117	178	178	134	138	178	178	209	211	119	121	210	220
SE-ON57	SE-ON	104	106	163	165	180	190	289	289	138	158	137	147	192	194	111	117	178	178	-9	-9	-9	-9	205	207	121	123	200	212
SE-ON58	SE-ON	88	104	159	159	178	180	271	271	152	156	137	141	190	202	111	117	174	178	134	140	172	178	211	219	113	121	200	220
SE-ON59	SE-ON	88	104	159	167	180	186	273	285	138	154	137	141	192	194	113	119	178	178	146	156	178	178	207	213	123	127	226	226
SE-ON60	SE-ON	100	104	159	161	178	178	265	285	140	156	139	141	186	188	117	119	178	178	142	154	174	178	209	217	121	127	208	230
SE-ON61	SE-ON	96	102	159	159	174	186	265	269	142	166	137	139	192	198	115	117	178	178	156	156	174	174	205	215	125	127	222	228
SE-ON62	SE-ON	94	104	159	163	178	180	283	283	140	142	137	137	194	194	111	117	178	180	144	156	178	178	213	213	113	121	210	212
SE-ON63	SE-ON	88	88	159	163	176	178	265	277	156	158	139	141	192	194	115	117	178	178	134	140	178	180	207	207	121	121	220	224
SE-ON64	SE-ON	88	104	159	163	178	178	293	293	142	166	137	139	192	194	105	111	174	176	140	152	178	178	207	207	117	119	212	228
SE-ON65	SE-ON	96	108	161	165	178	188	265	285	138	152	137	141	190	192	111	117	178	178	138	140	-9	-9	207	207	117	121	222	226
SE-ON66	SE-ON	94	104	161	163	186	190	273	277	140	154	137	141	188	190	109	111	176	178	140	142	178	178	211	219	119	127	220	220
SE-ON67	SE-ON	88	100	159	159	180	186	269	277	138	156	139	147	188	190	109	113	178	180	134	138	174	178	207	211	121	127	220	220
SE-ON68	SE-ON	92	104	159	163	182	188	259	277	140	140	139	139	190	194	111	115	178	178	140	146	172	178	205	207	119	121	210	220
SE-ON69	SE-ON	-9	-9	159	159	182	188	259	277	140	152	133	133	190	194	111	111	174	176	140	140	-9	-9	-9	-9	119	121	210	220
SE-ON70	SE-ON	88	100	159	161	180	180	265	269	138	140	-9	-9	190	190	113	117	176	178	134	152	174	176	207	211	121	127	220	222
SE-ON71	SE-ON	100	104	159	161	-9	-9	-9	-9	140	152	137	137	190	194	111	115	174	176	134	140	176	178	207	213	119	121	220	222
SE-ON72	SE-ON	106	106	157	159	184	186	265	277	138	140	141	143	190	190	111	115	174	174	140	156	170	174	211	213	115	121	210	220
SE-ON73	SE-ON	88	108	159	167	178	184	265	287	158	166	137	143	190	190	113	117	178	178	140	144	176	178	211	213	121	125	220	222
SE-ON74	SE-ON	88	100	159	159	176	178	273	277	138	156	-9	-9	-9	-9	111	119	178	180	154	158	174	176	207	209	121	125	212	212
SE-ON75	SE-ON	96	102	159	163	178	186	273	281	158	158	137	137	186	194	111	115	178	178	156	156	174	178	205	211	117	117	208	224
SE-ON76	SE-ON	88	104	157	159	178	186	273	293	152	156	139	141	186	190	113	117	178	180	146	154	172	174	217	219	121	121	220	226
SE-ON77	SE-ON	88	88	157	159	180	184	265	287	140	140	133	137	190	192	113	117	178	178	138	140	178	178	213	219	121	121	210	214
SE-ON78	SE-ON	88	108	155	159	178	180	271	293	138	156	137	139	190	192	111	117	174	180	140	156	174	174	207	217	119	121	206	206
SE-ON79	SE-ON	88	100	159	159	176	178	273	277	140	142	137	139	192	194	113	113	178	182	144	156	174	178	211	211	113	125	208	222
SE-ON80	SE-ON	92	104	159	163	182	186	273	299	152	162	137	137	194	196	111	111	174	178	138	158	178	178	207	217	119	121	212	220
SE-ON81	SE-ON	100	104	161	163	180	190	269	287	140	152	-9	-9	190	190	115	117	176	178	134	140	-9	-9	207	219	121	121	220	222
SE-ON82	SE-ON	88	108	159	159	178	180	-9	-9	158	166	137	137	190	192	111	113	174	174	140	156	174	178	207	211	119	121	220	228
SE-ON83	SE-ON	88	96	159	163	178	180	289	293	138	158	-9	-9	190	192	113	117	174	174	138	140	172	174	211	211	117	119	220	220
SE-ON84	SE-ON	104	108	163	163	176	186	273	303	140	140	137	137	192	194	113	117	178	180	134	150	174	176	205	209	115	121	220	222
SE-ON85	SE-ON	88	104	167	167	178	184	277	287	138	158	137	137	190	194	113	113	178	178	144	152	174	178	213	213	121	125	212	220
SE-ON86	SE-ON	92	96	159	167	174	180	273	297	138	156	137	137	194	194	111	111	178	180	140	140	178	178	205	213	113	123	200	210
SE-ON87	SE-ON	88	104	159	163	178	178	273	283	138	146	137	137	190	192	117	117	178	178	144	154	178	178	205	213	119	123	210	212
SE-ON88	SE-ON	104	104	159	163	182	186	273	299	152	162	133	137	190	194	111	111	174	178	138	140	178	178	207	217	119	121	212	222
SE-ON89	SE-ON	88	104	163	163	186	186	271	281	140	142	137	137	186	196	111	115	174	178	148	158	176	178	211	219	119	123	220	222
SE-ON90	SE-ON	88	106	155	159	178	180	-9	-9	142	156	137	137	194	194	113	119	174	178	156	156	178	178	217	219	113	115	210	220
SE-ON91	SE-ON	104	108	159	163	178	190	271	273	160	160	137	143	-9	-9	107	107	176	178	140	156	174	178	205	207	119	127	200	220
SE-ON92	SE-ON	88	90	159	167	174	188	273	293	140	140	137	139	180	194	111	117	176	178	-9	-9	-9	-9	213	213	113	117	206	220
SE-ON93	SE-ON	96	104	159	163	178	180	271	271	140	142	135	137	-9	-9	115	119	178	180	138	140	-9	-9	211	217	121	127	222	224
SE-ON94	SE-ON	104	104	159	163	178	186	273	293	152	154	137	139	186	194	109	113	178	180	122	138	174	178	213	217	121	125	210	226
SE-ON95	SE-ON	88	88	159	161	180	186	273	293	152	152	141	141	190	194	105	105	178	178	156	156	178	180	207	215	121	121	208	220
SE-ON96	SE-ON	88	104	159	161	-9	-9	-9	-9	140	152	137	137	190	194	111	115	174	176	140	140	176	178	207	213	121	121	220	220
SE-ON97	SE-ON	90	106	-9	-9	182	184	273	277	156	158	137	137	-9	-9	109	117	178	178	140	144	178	178	219	219	121	121	212	220
SE-ON98	SE-ON	88	90	159	161	178	180	273	299	140	156	133	133	190	194	107	111	178	178	140	142	-9	-9	209	213	121	125	206	208
SE-ON99	SE-ON	88	102	159	167	178	186	269	273	142	144	139	145	190	194	113	115	178	178	140	140	174	178	207	213	123	127	210	222
SE-ON100	SE-ON	98	104	163	163	182	184	273	275	138	140	137	137	-9	-9	115	117	178	178	146	154	174	178	217	217	121	125	220	222
SE-ON101	SE-ON	88	104	159	163	178	188	265	283	142	152	139	147	194	194	113	113	178	178	150	150	180	180	211	213	119	127	200	200
SE-ON102	SE-ON	88	106	163	163	178	184	273	287	156	162	139	139	196	196	113	117	178	180	140	144	172	178	211	213	121	123	212	220
SE-ON103	SE-ON	96	106	159	163	178	182	273	273	142	152	133	133	194	202	111	117	178	178	146	150	174	178	209	209	121	121	208	222
SE-ON104	SE-ON	88	92	167	167	180	184	265	295	138	158	137	137	190	194	111	113	178	178	220	140	176	178	205	213	123	125	210	220
SE-ON105	SE-ON	104	110	161	163	178	182	273	299	152	152	137	147	190	196	111	117	174	178	140	158	176	178	207	209	121	121	220	222
SE-ON106	SE-ON	104	108	159	163	178	190	271	273	138	158	137	143	192	202	107	115	176	178	140	156	174	178	205	207	119	127	200	220
SE-ON107	SE-ON	104	104	159	159	178	178	271	299	140	160	137	137	194	196	101	119	178	178	140	158	172	178	207	211	121	123	210	224
SE-ON108	SE-ON	88	104	159	159	182	186	289	291	142	152	137	141	190	190	115	115	180	182	156	156	178	180	213	213	123	127	206	206
SE-ON109	SE-ON	88	96	167	167	180	184	265	273	138	166	137	143	190	194	111	117	178	178	140	140	178	178	213	213	113	121	210	222
SE-ON110	SE-ON	90	104	159	161	178	180	271	273	140	160	137	141	180	196	101	117	176	178	142	158	174	178	207	209	123	125	206	224
SE-ON111	SE-ON	88	104	-9	-9	180	180	289	291	140	142	139	141	190	196	115	117	174	178	-9	-9	176	178	213	213	119	123	208	220
SE-ON112	SE-ON	88	104	159	161	176	184	271	281	132	140	137	141	190	192	113	115	178	180	134	158	174	182	213	217	115	117	218	222
SE-ON113	SE-ON	88	88	157	159	186	188	267	273	138	140	137	141	190	202	113	115	178	180	140	140	174	178	209	209	119	121	210	214
SE-ON114	SE-ON	88	88	-9	-9	186	188	273	293	142	158	139	141	192	194	119	119	178	182	140	140	178	178	207	219	119	121	210	214
SE-ON115	SE-ON	88	98	-9	-9	178	180	281	293	-9	-9	139	143	190	194	117	119	176	180	146	156	178	178	205	215	113	121	220	228
SE-ON116	SE-ON	88	104	159	161	184	186	265	281	140	152	137	141	190	190	105	119	176	178	138	148	178	178	205	215	119	121	220	226
SE-ON117	SE-ON	88	104	159	165	178	184	265	265	142	158	137	137	188	194	107	115	178	178	140	152	178	178	207	213	117	121	212	220
SE-ON118	SE-ON	88	106	165	165	180	182	271	275	142	158	133	141	188	192	105	117	178	178	148	150	178	180	209	215	117	123	212	226
SE-ON119	SE-ON	104	106	-9	-9	178	178	273	293	154	158	137	147	192	192	105	111	178	180	140	150	174	176	213	219	119	121	224	224
SE-ON120	SE-ON	88	104	163	165	178	188	265	291	142	158	137	137	194	202	111	115	178	178	140	152	176	178	213	219	113	121	208	230
SE-ON121	SE-ON	88	100	161	163	178	178	-9	-9	142	162	141	143	192	196	111	115	174	176	138	156	176	178	207	215	119	127	222	222
SE-ON122	SE-ON	88	100	159	159	178	188	265	281	142	152	141	151	190	198	113	119	180	180	138	148	178	178	207	211	117	119	208	226
SE-ON123	SE-ON	104	104	159	165	186	188	271	275	140	162	137	141	194	196	107	117	178	178	156	158	178	178	213	215	121	123	206	220
SE-ON124	SE-ON	88	88	163	163	-9	-9	-9	-9	162	162	141	143	192	192	111	115	174	176	138	156	178	178	205	219	113	119	222	222
SE-ON125	SE-ON	88	88	159	159	176	178	281	289	142	154	137	139	190	190	115	117	176	176	146	148	174	182	205	217	115	129	212	220
SE-ON126	SE-ON	88	96	157	167	178	180	265	277	140	140	141	141	188	192	111	115	176	180	138	140	178	178	211	213	121	123	206	220
SE-ON127	SE-ON	88	88	159	163	178	188	281	289	140	158	139	141	192	194	115	115	176	178	140	152	174	178	211	215	117	127	208	212
SE-ON128	SE-ON	88	106	163	163	178	180	273	275	138	158	141	141	190	194	113	115	178	178	138	156	174	178	207	207	119	127	212	224
SE-ON129	SE-ON	88	88	161	161	178	178	275	299	142	160	141	143	192	192	111	115	174	176	138	156	178	178	205	219	113	119	214	222
SE-ON130	SE-ON	88	100	159	167	178	188	273	293	132	160	137	141	192	194	113	115	174	174	138	156	174	178	207	219	117	121	220	222
SE-ON131	SE-ON	98	104	157	159	178	178	281	281	140	146	141	141	190	196	113	115	176	180	144	152	174	178	211	213	115	117	208	214
SE-ON132	SE-ON	88	88	159	163	186	188	273	275	138	142	137	151	194	202	113	115	178	180	148	152	178	180	207	217	117	127	210	218
SE-ON133	SE-ON	100	100	159	167	186	186	273	291	140	142	139	141	190	190	113	119	178	178	138	158	178	178	205	215	115	125	210	210
SE-ON134	SE-ON	96	104	153	161	184	188	273	291	140	142	137	141	190	190	117	119	176	178	146	156	172	178	205	217	119	125	226	230
SE-ON135	SE-ON	92	106	159	165	180	180	273	275	140	156	139	139	194	194	101	117	178	178	144	158	178	178	209	215	115	119	206	212
SE-ON136	SE-ON	100	104	159	163	178	188	275	279	140	142	137	141	188	190	117	117	178	178	152	152	174	178	207	209	115	121	224	224
SE-ON137	SE-ON	96	104	159	159	180	188	273	299	140	156	137	141	190	198	113	115	176	178	134	140	172	176	207	217	115	121	210	224
SE-ON138	SE-ON	100	100	159	167	176	186	273	293	132	160	137	137	194	198	107	113	178	178	156	156	174	178	207	207	117	121	212	220
SE-ON139	SE-ON	98	104	157	157	184	184	283	285	138	140	137	139	192	192	107	113	178	178	128	156	166	172	211	215	121	125	220	220
SE-ON140	SE-ON	104	106	159	159	178	186	271	295	140	154	139	139	190	202	107	117	178	178	142	144	174	178	207	209	121	125	208	212
SE-ON141	SE-ON	104	104	159	159	178	178	283	291	142	158	139	141	194	198	111	117	178	178	140	144	170	178	207	213	121	125	208	212
SE-ON142	SE-ON	96	96	159	169	186	186	273	273	158	158	137	139	190	196	101	119	174	174	148	158	174	174	215	215	121	125	218	224
SE-ON143	SE-ON	100	106	157	157	178	180	271	271	140	148	137	139	190	196	115	117	178	178	140	140	170	174	213	213	117	121	206	212
SE-ON144	SE-ON	88	104	155	163	178	186	271	277	132	142	137	137	190	190	115	115	178	182	128	144	178	178	211	217	117	125	220	220
SE-ON145	SE-ON	88	104	157	163	178	180	265	275	152	154	137	141	188	190	113	117	178	180	128	142	178	178	211	217	115	119	208	208
SE-ON146	SE-ON	88	104	163	169	180	186	267	279	140	158	137	143	190	194	111	113	178	178	132	148	178	180	211	217	113	117	218	222
SE-ON147	SE-ON	100	106	157	157	180	180	269	273	142	142	137	141	196	196	115	117	180	180	136	156	176	176	215	219	121	125	206	212
SE-ON148	SE-ON	88	96	159	165	184	186	295	299	138	142	141	143	194	196	117	117	178	178	150	152	178	182	211	217	119	119	212	212
SE-ON149	SE-ON	94	100	159	163	178	186	-9	-9	138	142	137	141	194	194	111	115	178	178	148	152	174	178	205	217	121	121	226	226
SE-ON150	SE-ON	88	92	163	163	180	188	279	279	142	142	133	139	190	194	115	117	174	178	142	148	176	178	207	217	121	123	212	220
SE-ON151	SE-ON	88	106	163	165	180	190	273	273	152	156	137	137	190	190	113	117	178	182	140	156	176	178	205	217	125	125	212	212
SE-ON152	SE-ON	100	106	159	163	188	188	273	289	140	142	137	139	190	192	115	115	174	180	140	156	174	174	211	219	115	127	208	222
SE-ON153	SE-ON	100	104	159	159	178	184	291	291	140	152	141	147	190	194	113	117	178	178	148	156	176	178	205	213	115	119	208	208
SE-ON154	SE-ON	88	102	161	169	180	186	271	273	138	152	137	151	190	194	105	117	178	180	148	156	174	178	211	213	117	121	206	222
SE-ON155	SE-ON	100	104	157	169	184	184	271	273	140	152	133	139	186	194	115	119	174	178	156	158	178	178	215	217	119	125	222	226
SE-ON156	SE-ON	88	88	161	163	178	184	275	293	140	152	137	143	194	194	113	117	176	178	120	140	174	174	217	217	121	125	222	224
SE-ON157	SE-ON	98	100	159	159	186	188	269	273	152	152	141	151	190	192	115	117	176	178	138	158	178	178	211	213	115	117	210	220
SE-ON158	SE-ON	88	106	159	161	186	188	271	273	138	162	141	147	190	190	105	117	178	178	152	156	176	178	215	217	117	119	212	224
SE-ON159	SE-ON	88	106	159	167	180	184	273	273	142	146	137	137	190	190	115	119	178	178	140	152	176	178	217	219	121	123	208	220
SE-ON160	SE-ON	100	106	-9	-9	176	176	275	277	-9	-9	139	141	190	194	115	115	176	182	152	152	174	178	211	219	115	125	206	218
SE-ON161	SE-ON	96	106	157	159	178	180	271	291	140	162	147	153	194	194	111	115	176	178	148	150	178	178	211	215	119	123	210	226
SE-ON162	SE-ON	100	106	157	167	188	188	279	279	140	154	139	141	190	192	111	115	174	180	138	148	176	180	207	219	121	121	208	220
SE-ON163	SE-ON	88	100	157	161	176	184	269	275	142	152	137	137	192	194	113	115	176	176	140	146	174	174	207	217	121	125	206	224
SE-ON164	SE-ON	90	90	159	159	182	186	265	281	146	158	141	141	192	202	115	117	174	182	156	158	178	178	205	205	119	123	222	226
SE-ON165	SE-ON	88	92	159	159	176	178	275	281	140	160	139	139	192	194	113	115	178	178	148	148	172	178	211	213	115	121	210	224
SE-ON166	SE-ON	104	106	169	169	178	186	-9	-9	162	164	137	141	190	190	115	115	176	180	138	152	178	178	207	217	113	121	206	220
SE-ON167	SE-ON	88	106	169	169	184	184	265	273	162	164	137	147	192	192	109	119	178	180	156	158	178	178	205	209	115	121	222	222
SE-ON168	SE-ON	98	106	159	159	186	188	267	279	140	168	137	141	190	190	109	115	178	180	140	156	178	178	205	213	121	125	200	206
SE-ON169	SE-ON	94	104	159	163	178	188	273	293	140	160	137	153	190	194	105	113	176	178	140	156	-9	-9	-9	-9	115	117	200	218
SE-ON170	SE-ON	100	106	163	163	180	188	265	265	140	154	137	137	186	192	115	117	178	178	124	152	176	178	207	209	121	125	218	218
SE-ON171	SE-ON	102	106	159	159	178	180	259	269	138	138	137	137	194	194	107	117	172	174	148	150	170	172	211	213	115	119	206	208
SE-ON172	SE-ON	100	104	161	161	178	178	275	275	154	162	137	147	190	196	117	117	174	176	140	140	178	178	205	213	121	121	206	220
SE-ON173	SE-ON	88	96	165	165	176	186	269	269	142	142	137	137	186	194	113	119	176	178	138	142	172	176	211	211	115	123	226	226
SE-ON174	SE-ON	88	104	159	163	180	188	275	275	138	156	133	141	186	190	105	121	178	178	140	142	172	172	207	217	117	119	200	208
SE-ON175	SE-ON	88	92	159	165	180	188	-9	-9	138	138	137	141	194	194	115	115	176	178	148	156	172	178	-9	-9	117	117	200	210
SE-ON176	SE-ON	88	100	159	163	186	186	281	287	142	142	141	143	194	196	105	117	178	178	128	152	178	182	211	217	119	127	212	222
SE-ON177	SE-ON	100	104	159	167	174	180	265	299	138	158	137	141	190	194	113	115	176	176	128	138	174	178	207	213	115	123	206	222
SE-ON178	SE-ON	88	100	159	163	176	180	285	287	138	158	139	141	188	192	113	113	176	178	140	158	172	178	209	211	115	115	206	208
SE-ON179	SE-ON	88	102	157	159	178	180	265	269	138	138	137	141	190	194	107	119	178	178	142	148	172	178	211	213	119	123	200	212
SE-ON180	SE-ON	88	104	163	163	186	186	269	279	162	166	137	147	190	194	115	117	176	178	138	156	178	178	211	213	119	121	206	206
SE-ON181	SE-ON	88	104	161	167	184	184	279	283	146	156	139	141	194	196	111	117	176	178	142	148	178	178	209	213	119	121	212	226
SE-ON182	SE-ON	100	104	159	163	184	186	279	289	138	142	139	141	194	194	115	115	176	180	138	140	178	180	213	215	115	121	222	226
SE-ON183	SE-ON	88	106	159	159	178	180	285	297	146	156	137	141	190	194	115	115	176	176	158	158	176	178	211	211	115	115	220	220
SE-ON184	SE-ON	100	104	159	167	178	186	269	279	142	158	133	139	194	198	111	111	176	178	136	138	178	178	213	219	117	119	-9	-9
SE-ON185	SE-ON	88	88	159	163	180	180	269	269	146	158	141	141	194	194	115	115	176	180	148	158	166	178	209	211	115	119	220	220
SE-ON186	SE-ON	96	100	163	163	178	188	279	285	152	158	139	141	190	192	115	117	174	178	148	148	166	178	213	213	119	123	224	224
SE-ON187	SE-ON	100	104	159	159	178	186	287	295	140	162	137	137	190	196	115	115	174	178	140	158	178	178	205	213	123	123	220	224
SE-ON188	SE-ON	104	104	159	167	186	188	271	281	140	140	137	141	192	194	115	117	176	178	142	148	172	178	213	217	121	123	208	220
SE-ON189	SE-ON	104	104	163	167	184	188	267	285	154	154	137	137	190	194	113	115	178	178	140	148	166	166	207	213	115	121	208	208
SE-ON190	SE-ON	94	104	163	163	178	188	273	279	132	138	137	141	190	196	111	117	174	178	148	148	166	178	211	213	123	123	224	224
SE-ON191	SE-ON	98	100	163	163	180	184	273	279	140	156	137	139	180	186	105	117	174	176	138	158	176	176	213	213	115	117	206	208
SE-ON192	SE-ON	100	100	161	163	182	184	269	271	158	162	137	141	194	194	115	119	172	176	134	148	-9	-9	211	213	115	117	-9	-9
SE-ON193	SE-ON	100	100	159	167	178	186	269	273	144	146	137	141	194	194	113	115	178	178	138	158	178	178	207	211	115	121	220	222
SE-ON194	SE-ON	88	106	159	167	180	182	275	275	142	146	137	141	194	194	115	117	178	178	132	154	166	172	205	219	115	121	206	212
SE-ON195	SE-ON	88	106	159	163	180	184	273	273	140	160	135	147	194	194	111	115	178	180	138	140	174	178	209	217	119	121	220	222
SE-ON196	SE-ON	90	104	159	161	178	188	279	295	138	162	139	139	190	196	113	117	180	180	140	148	172	174	211	213	123	125	210	210
SE-ON197	SE-ON	100	106	159	159	178	188	265	275	140	156	137	141	188	190	113	115	178	178	140	140	178	180	205	213	115	115	222	222
SE-ON198	SE-ON	100	106	159	167	184	188	269	275	138	158	141	143	190	196	115	117	174	176	140	140	178	178	211	217	115	117	222	222
SE-ON199	SE-ON	88	88	159	161	178	188	281	291	142	156	141	143	190	194	117	119	178	180	138	148	174	178	211	213	117	121	206	208
SE-ON200	SE-ON	88	94	159	159	176	178	295	295	142	146	137	139	190	194	115	117	178	178	140	156	174	176	211	211	117	123	210	220
SE-ON201	SE-ON	94	104	163	167	178	186	273	279	152	158	139	141	190	192	111	117	174	182	148	148	166	174	211	213	123	123	218	224
SE-ON202	SE-ON	96	100	159	159	178	178	269	295	140	142	137	137	194	194	111	113	178	178	142	150	172	174	211	213	115	121	206	208
SE-ON203	SE-ON	94	106	159	163	176	178	273	285	132	152	141	145	192	194	113	115	178	178	140	148	166	176	207	213	119	123	206	224
SE-ON204	SE-ON	94	106	159	163	176	178	273	285	132	152	137	141	192	196	111	115	178	178	140	148	166	176	207	213	119	123	206	224
SE-ON205	SE-ON	88	100	161	161	176	178	271	275	142	144	139	141	192	192	117	117	176	178	126	156	178	178	211	213	121	127	206	220
SE-ON206	SE-ON	100	104	159	163	174	188	269	293	140	142	139	141	194	194	111	111	176	178	136	150	172	178	207	213	121	125	212	222
SE-ON207	SE-ON	92	106	161	161	184	186	-9	-9	138	140	-9	-9	194	194	115	117	178	178	140	142	180	182	205	217	115	129	212	220
SE-ON208	SE-ON	88	108	159	167	178	184	273	279	142	142	137	141	194	192	111	113	178	178	138	138	176	180	213	213	115	125	208	220
SE-ON209	SE-ON	100	104	161	163	174	178	273	273	142	156	143	143	194	194	115	117	176	176	152	160	178	178	209	211	121	125	206	212
SE-ON210	SE-ON	88	104	159	161	178	178	-9	-9	140	164	143	153	190	194	117	119	172	176	138	144	178	178	211	211	121	123	206	222
SE-ON211	SE-ON	100	104	159	161	178	184	273	285	154	162	137	137	194	194	109	115	176	178	148	158	172	178	211	213	117	119	208	228
SE-ON212	SE-ON	88	100	159	163	180	186	285	299	162	162	137	137	194	194	113	117	174	178	148	148	176	178	211	213	119	121	220	220
SE-ON213	SE-ON	88	88	161	167	178	186	273	295	152	156	-9	-9	190	194	115	117	176	178	140	150	178	178	207	211	119	123	212	220
SE-ON214	SE-ON	88	96	159	167	180	186	269	281	-9	-9	137	141	190	194	107	115	178	178	140	158	178	178	213	215	119	119	208	220
SE-ON215	SE-ON	88	104	163	163	184	186	271	287	140	140	141	141	190	194	113	115	178	178	140	150	166	178	205	217	117	119	208	212
SE-ON216	SE-ON	88	104	159	161	174	184	269	273	138	154	137	141	194	194	113	115	180	180	140	158	178	178	213	213	119	121	226	228
SE-ON217	SE-ON	88	100	161	163	178	184	269	291	140	152	141	151	194	194	109	115	176	178	142	148	172	174	211	211	117	123	208	220
SE-ON218	SE-ON	98	100	159	159	178	186	269	285	152	154	137	137	196	196	113	115	174	176	140	140	178	178	213	213	117	125	208	208
SE-ON219	SE-ON	88	104	163	167	176	180	269	279	140	162	137	139	194	194	115	115	178	180	122	158	176	178	211	213	117	117	218	226
SE-ON220	SE-ON	100	104	159	161	188	188	265	273	140	158	139	139	190	194	115	115	176	176	142	152	166	174	211	211	119	121	206	206
SE-ON221	SE-ON	88	96	159	159	180	184	269	273	154	158	-9	-9	190	190	115	117	172	178	138	138	178	178	209	215	119	121	208	220
SE-ON222	SE-ON	88	98	159	163	178	180	279	289	140	156	133	141	194	194	115	115	174	178	140	142	172	176	205	211	121	121	220	222
SE-ON223	SE-ON	106	106	161	167	176	184	287	287	142	144	135	151	194	194	115	115	176	180	140	140	176	178	213	215	119	123	206	220
SE-ON224	SE-ON	88	88	159	161	180	188	269	285	140	140	137	151	-9	-9	105	117	180	180	140	142	174	180	205	211	121	123	208	208
SE-ON225	SE-ON	92	108	159	163	184	184	273	283	144	162	135	139	194	194	115	119	174	180	138	140	178	178	209	213	119	125	222	226
SE-ON226	SE-ON	88	106	159	169	186	186	273	291	140	142	137	141	194	194	111	117	174	178	156	156	178	178	211	211	113	121	206	208
SE-ON227	SE-ON	88	96	163	165	180	184	267	299	158	162	137	145	194	194	113	117	176	178	142	158	178	178	213	213	119	121	218	220
SE-ON228	SE-ON	100	104	159	163	178	188	-9	-9	138	140	137	137	194	194	109	113	174	176	140	148	172	176	-9	-9	117	121	208	220
SE-ON229	SE-ON	96	104	159	167	188	188	291	291	152	154	137	145	194	194	105	113	176	178	156	158	178	178	211	213	117	119	218	218
SE-ON230	SE-ON	100	106	159	161	180	188	269	273	138	142	-9	-9	186	194	117	119	174	176	140	158	174	178	209	213	117	119	222	226
SE-ON231	SE-ON	100	106	159	159	188	188	-9	-9	-9	-9	137	137	188	194	117	119	174	176	140	158	174	178	209	213	117	119	222	226
SE-ON232	SE-ON	92	108	-9	-9	174	184	273	283	-9	-9	135	139	190	194	115	119	174	180	140	140	178	178	209	213	119	125	222	226
SE-ON233	SE-ON	100	104	159	159	188	188	265	279	142	154	137	139	194	196	113	115	174	174	140	156	174	178	211	213	123	125	208	226
SE-ON234	SE-ON	88	104	163	163	178	182	273	281	138	156	137	141	196	196	113	115	176	178	138	140	178	178	205	211	119	121	210	210
SE-ON235	SE-ON	88	104	163	165	178	182	273	281	138	158	137	141	194	194	113	115	176	178	138	140	178	178	205	211	119	121	210	210
SE-ON236	SE-ON	88	110	163	163	178	186	273	293	158	158	139	141	-9	-9	115	117	176	178	156	158	178	178	213	213	119	121	-9	-9
SE-ON237	SE-ON	98	104	159	163	180	180	269	273	140	142	135	135	194	194	115	117	178	182	154	158	166	178	213	213	121	129	208	208
SE-ON238	SE-ON	88	106	157	159	182	186	275	283	140	150	137	141	192	194	111	117	178	178	146	158	172	178	209	217	123	123	206	226
SE-ON239	SE-ON	90	104	159	159	178	188	269	281	144	162	133	133	188	188	107	113	178	178	148	148	172	178	213	219	117	125	208	220
SE-ON240	SE-ON	88	104	159	161	184	188	273	273	140	152	137	141	194	194	109	109	176	180	138	158	176	178	213	217	121	123	206	226
SE-ON241	SE-ON	98	104	159	165	178	180	289	293	142	142	147	147	190	192	109	113	176	178	148	158	172	178	213	219	119	123	208	212
SE-ON242	SE-ON	94	94	159	159	180	184	287	291	140	142	137	143	194	194	107	115	178	182	148	158	166	180	207	213	113	119	220	220
SE-ON243	SE-ON	96	104	159	167	178	180	269	273	140	152	137	137	194	194	111	115	178	178	140	148	172	178	211	213	113	125	220	220
SE-ON244	SE-ON	104	104	157	167	180	188	265	273	132	138	139	141	192	194	115	115	180	182	148	156	166	174	209	213	117	123	212	226
SE-ON245	SE-ON	88	100	159	167	178	186	269	279	140	162	137	151	194	194	115	115	172	180	138	142	174	178	205	213	113	123	208	208
SE-ON246	SE-ON	104	104	159	159	180	188	265	273	142	148	139	141	190	194	115	117	178	180	138	152	174	174	213	213	117	125	200	212
SE-ON247	SE-ON	88	98	157	161	184	184	279	285	156	162	133	137	194	194	115	127	176	178	138	138	176	176	217	217	115	117	206	208
SE-ON248	SE-ON	104	104	167	167	-9	-9	279	285	156	158	137	141	186	194	117	117	178	180	158	158	174	178	213	217	121	123	212	222
SE-ON249	SE-ON	88	100	163	167	178	186	275	275	142	142	145	147	190	194	113	115	176	178	132	138	174	176	213	217	115	119	224	226
SE-ON250	SE-ON	88	100	161	161	178	186	273	295	132	158	135	137	190	190	115	115	178	178	150	150	174	180	215	217	117	121	220	220
SE-ON251	SE-ON	88	100	163	167	178	186	275	283	144	144	143	147	-9	-9	113	115	176	178	132	138	172	174	217	217	115	119	224	226
SE-ON252	SE-ON	88	98	157	163	178	180	279	285	156	162	133	137	196	196	115	117	176	178	140	140	-9	-9	217	217	115	127	206	208
SE-ON253	SE-ON	88	104	163	163	178	186	269	285	142	148	137	141	190	194	115	117	176	178	148	148	172	182	209	209	121	123	200	206
SE-ON254	SE-ON	98	104	163	163	182	182	269	275	140	142	137	141	194	194	113	115	178	180	148	154	174	178	209	215	121	129	200	208
SE-ON255	SE-ON	88	104	159	163	180	186	271	279	132	140	137	141	190	194	115	117	178	178	148	148	176	184	209	209	121	123	200	206
SE-ON256	SE-ON	88	98	159	167	182	190	269	287	142	156	137	141	190	194	105	117	178	180	136	154	178	178	213	213	115	117	206	222
SE-ON257	SE-ON	94	94	161	167	180	186	273	289	140	142	139	141	190	194	113	117	178	180	120	138	174	176	217	217	117	119	220	220
SE-ON258	SE-ON	94	104	159	167	178	180	269	271	142	154	137	137	194	194	107	119	176	178	140	154	178	178	213	217	113	121	200	228
SE-ON259	SE-ON	88	104	163	163	180	180	269	275	140	142	137	141	196	196	115	115	178	178	138	154	174	178	209	215	121	129	200	208
SE-ON260	SE-ON	88	104	159	163	178	180	269	293	140	156	137	137	194	194	113	115	180	180	148	154	174	178	213	215	123	130	206	208
SE-ON261	SE-ON	90	104	159	163	178	178	273	279	142	158	137	141	190	194	115	117	176	178	148	158	176	178	209	211	119	121	206	224
SE-ON262	SE-ON	88	104	165	165	178	186	269	273	140	142	137	141	190	194	115	117	178	178	-9	-9	-9	-9	-9	-9	121	123	206	206
SE-ON263	SE-ON	92	104	159	163	180	188	267	279	132	140	133	139	190	192	113	117	176	178	140	144	178	180	-9	-9	121	123	206	226
SE-ON264	SE-ON	88	100	159	163	184	184	273	275	158	160	141	141	190	190	115	117	176	178	150	150	174	176	217	217	117	121	206	208
SE-ON265	SE-ON	104	104	165	165	178	188	269	273	140	142	137	137	190	194	107	117	176	178	140	148	172	178	207	217	121	123	220	228
SE-ON266	SE-ON	96	104	159	163	180	190	265	279	140	158	141	141	190	194	113	115	178	180	148	158	178	178	211	213	119	129	208	224
SE-ON267	SE-ON	88	92	161	167	180	186	273	289	140	142	139	141	190	194	113	117	180	180	120	138	174	176	217	217	117	119	220	220
SE-ON268	SE-ON	104	104	161	167	180	180	281	293	146	162	137	139	190	194	113	117	178	182	140	154	174	178	213	213	119	125	212	212
SE-ON269	SE-ON	88	104	159	167	180	186	273	279	142	158	137	153	186	192	117	117	180	180	-9	-9	178	178	-9	-9	121	123	206	204
SE-ON270	SE-ON	88	88	159	167	180	186	259	259	142	160	147	147	186	194	117	117	172	176	144	158	174	178	207	213	121	123	208	222
SE-ON271	SE-ON	88	104	159	163	178	178	285	293	140	142	137	141	194	194	113	115	178	180	148	154	174	178	207	207	121	129	200	208
SE-ON272	SE-ON	104	108	157	159	178	180	273	273	154	154	137	137	190	194	113	115	176	178	148	150	178	180	-9	-9	113	123	206	210
SE-ON273	SE-ON	104	104	159	167	178	180	265	293	144	164	141	153	190	194	115	117	178	178	140	150	172	178	207	217	113	121	208	210
SE-ON274	SE-ON	88	104	159	163	178	180	285	285	140	142	137	141	194	194	113	123	172	180	136	154	174	174	209	215	115	115	208	208
SE-ON275	SE-ON	88	104	159	159	178	186	265	267	140	164	141	153	190	194	113	115	172	178	140	148	172	178	207	213	117	121	208	226
SE-ON276	SE-ON	88	88	159	167	176	178	293	293	138	142	137	143	192	192	115	115	178	178	132	144	172	178	213	217	119	123	226	226
SE-ON277	SE-ON	88	104	159	167	178	184	273	273	132	138	143	147	190	194	105	115	178	178	140	142	174	178	-9	-9	117	121	198	206
SE-ON278	SE-ON	94	108	155	167	188	188	273	285	138	140	139	139	192	194	113	117	178	180	156	158	178	180	211	213	127	127	224	224
SE-ON279	SE-ON	88	98	163	167	184	188	269	291	158	164	139	141	190	194	113	115	174	178	154	156	178	180	209	213	119	125	212	226
SE-ON280	SE-ON	88	88	157	159	180	186	273	273	154	154	147	147	190	194	117	117	172	176	144	158	174	178	-9	-9	121	123	208	208
SE-ON281	SE-ON	104	104	167	167	184	186	265	269	156	162	141	143	190	194	115	117	172	178	154	154	172	180	209	213	123	125	214	226
SE-ON282	SE-ON	88	94	161	163	176	180	265	289	140	154	137	139	194	194	113	115	180	180	120	148	174	176	213	217	113	119	208	220
SE-ON283	SE-ON	98	104	163	167	180	184	269	293	162	162	141	151	190	190	113	115	174	178	140	154	178	180	207	209	113	125	210	226
SE-ON284	SE-ON	88	104	163	167	186	188	265	279	140	142	141	151	186	192	115	117	178	180	158	158	176	178	207	215	117	123	206	206
SE-ON285	SE-ON	88	104	159	167	180	186	273	279	142	156	137	151	186	192	117	117	180	180	158	158	178	178	215	217	121	123	206	206
SE-ON286	SE-ON	88	104	163	167	176	178	265	269	140	154	137	151	194	194	113	115	178	180	148	148	174	174	207	213	113	123	208	208
SE-ON287	SE-ON	104	108	159	167	-9	-9	265	293	162	162	-9	-9	190	194	115	117	174	176	140	158	178	180	207	213	113	117	216	226
SE-ON288	SE-ON	88	88	159	163	178	178	293	293	142	154	137	143	192	194	115	115	178	180	132	154	174	178	213	217	119	129	206	226
SE-ON289	SE-ON	104	108	159	159	180	180	269	273	152	152	137	137	190	194	113	115	176	178	146	148	178	180	209	213	113	123	206	210
SE-ON290	SE-ON	104	104	163	167	176	178	265	267	140	154	141	153	190	194	115	115	176	178	148	158	174	174	207	211	113	119	206	208
SE-ON291	SE-ON	88	104	161	163	176	184	279	279	142	158	135	137	190	194	115	117	174	180	138	156	172	176	213	213	119	123	226	226
SE-ON292	SE-ON	88	100	163	163	178	180	269	293	142	154	141	143	192	194	115	115	178	180	132	140	178	180	205	217	119	129	208	226
SE-ON293	SE-ON	104	104	159	163	180	188	269	269	138	154	139	141	194	194	105	107	178	180	140	140	176	180	205	213	115	119	222	222
SE-ON294	SE-ON	94	104	159	167	186	188	259	273	140	152	139	141	190	190	105	115	178	180	-9	-9	-9	-9	207	215	113	121	220	222
SE-ON295	SE-ON	104	108	161	163	178	180	293	293	138	160	137	147	190	194	113	115	178	180	154	156	178	178	211	213	119	129	208	210
SE-ON296	SE-ON	104	106	159	159	178	188	273	289	152	156	139	141	190	194	115	115	172	178	146	154	178	180	211	213	121	121	206	220
SE-ON297	SE-ON	88	98	165	165	186	186	259	291	152	158	137	147	186	194	115	117	172	180	138	158	174	178	211	213	115	121	222	230
SE-ON298	SE-ON	88	108	163	167	180	180	265	269	140	152	137	141	190	194	113	113	172	184	138	148	178	180	209	217	117	121	222	222
SE-ON299	SE-ON	88	104	159	167	178	184	285	285	142	162	133	145	194	194	113	115	178	178	132	142	172	176	213	213	115	119	226	226
SE-ON300	SE-ON	104	108	159	167	178	186	265	269	156	162	141	143	194	194	113	117	172	176	154	154	178	178	213	213	-9	-9	214	216
SE-ON301	SE-ON	98	104	163	167	180	184	269	293	164	164	141	153	190	190	113	115	174	178	140	154	178	180	207	209	113	125	210	226
SE-ON302	SE-ON	88	108	159	161	176	178	291	297	158	162	133	137	190	194	115	117	174	178	140	156	172	180	211	213	115	119	222	226
SE-ON303	SE-ON	88	104	159	159	180	184	269	269	132	140	137	147	190	194	115	117	178	178	140	148	178	180	209	213	121	125	220	230
SE-ON304	SE-ON	100	104	159	167	182	188	269	273	142	156	141	151	194	194	107	115	178	178	128	148	172	178	205	209	121	123	220	220
SE-ON305	SE-ON	88	104	159	159	174	174	269	273	138	152	137	137	186	190	113	119	176	184	146	148	178	182	213	217	121	123	226	226
SE-ON306	SE-ON	100	100	159	159	178	188	273	291	152	156	139	151	190	194	115	115	172	176	140	142	166	178	211	213	117	117	206	222
SE-ON307	SE-ON	104	108	159	167	178	180	271	287	140	156	139	141	186	192	115	117	178	180	140	140	180	180	211	213	115	123	212	214
SE-ON308	SE-ON	94	100	163	163	176	180	269	283	142	158	137	141	194	194	113	115	178	180	140	140	178	180	205	213	117	119	208	208
SE-ON309	SE-ON	88	106	159	163	180	186	259	273	142	152	143	147	190	194	115	117	178	178	144	146	166	178	207	215	119	121	208	220
SE-ON310	SE-ON	88	104	159	161	180	184	269	273	132	144	137	137	194	194	113	115	174	178	142	148	176	178	207	207	121	123	208	226
SE-ON311	SE-ON	88	104	161	163	180	184	269	283	132	144	137	139	192	194	115	115	178	178	142	148	176	178	207	209	121	123	208	226
SE-ON312	SE-ON	94	94	159	163	180	180	273	287	142	158	139	141	190	192	113	117	178	180	120	138	174	176	217	217	115	117	220	220
SE-ON313	SE-ON	88	104	159	167	188	188	273	279	140	160	139	141	190	194	113	119	178	184	122	140	178	180	211	211	121	127	220	220
SE-ON314	SE-ON	88	104	159	165	174	182	273	273	140	142	141	141	194	194	107	107	178	178	140	156	172	178	209	217	113	121	208	208
SE-ON315	SE-ON	96	104	161	163	188	188	263	279	138	140	133	147	190	190	113	117	178	180	148	148	178	180	213	213	115	123	222	226
SE-ON316	SE-ON	88	104	159	167	188	188	273	279	140	142	139	141	190	194	113	119	178	182	122	140	178	180	211	211	121	127	214	220
SE-ON317	SE-ON	104	104	159	165	180	184	273	273	142	158	133	133	186	190	113	115	174	178	148	156	174	176	209	211	121	123	218	226
SE-ON318	SE-ON	94	104	159	167	180	188	265	273	142	142	141	141	190	194	113	117	180	180	138	152	174	174	213	217	117	117	220	220
SE-ON319	SE-ON	104	104	161	163	176	178	273	279	152	156	137	141	190	194	115	115	174	178	132	142	172	182	213	213	117	121	208	208
SE-ON320	SE-ON	88	96	159	159	174	174	269	273	142	154	141	141	194	194	105	107	178	180	140	156	178	178	209	217	113	123	208	208
SE-ON321	SE-ON	88	104	159	167	178	180	273	281	-9	-9	137	139	192	194	115	117	178	180	140	140	178	178	211	211	115	125	222	222
SE-ON322	SE-ON	88	104	159	161	178	182	273	275	142	158	137	141	192	194	115	115	172	176	138	138	178	178	207	213	113	115	206	206
SE-ON323	SE-ON	104	104	159	167	-9	-9	265	293	146	146	141	153	190	194	115	117	178	178	140	148	172	178	207	217	113	121	206	208
SE-ON324	SE-ON	88	104	159	167	180	184	269	269	140	140	135	137	190	194	117	117	176	176	138	142	178	178	211	211	119	125	220	220
SE-ON325	SE-ON	100	104	155	167	178	182	269	273	138	162	137	137	190	192	115	119	176	178	140	150	176	178	207	213	119	125	220	220
SE-ON326	SE-ON	98	104	159	163	184	186	273	287	138	158	141	147	190	198	107	113	178	178	140	154	178	178	205	215	117	119	208	208
SE-ON327	SE-ON	90	98	161	161	176	178	265	269	140	152	133	137	194	194	115	117	176	178	142	148	178	180	207	213	121	121	214	214
SE-ON328	SE-ON	104	104	159	163	180	180	293	295	156	162	137	139	190	194	113	115	178	180	148	154	174	178	213	213	125	129	206	210
SE-ON329	SE-ON	88	88	159	159	180	184	279	279	142	152	133	141	194	194	115	117	176	180	140	158	178	178	211	213	121	123	218	218
SE-ON330	SE-ON	88	96	159	167	178	188	273	283	142	146	137	137	190	194	107	119	178	180	146	158	178	178	213	215	113	115	226	228
SE-ON331	SE-ON	98	104	159	163	188	188	269	273	140	142	137	141	190	194	113	115	174	178	140	156	172	178	211	213	117	121	220	222
SE-ON332	SE-ON	108	108	159	167	174	178	273	283	140	142	137	139	194	196	113	119	178	178	140	146	178	178	213	213	115	121	210	222
SE-ON333	SE-ON	88	108	159	161	178	182	283	287	138	156	137	141	190	196	113	115	176	178	140	140	174	180	211	213	127	129	220	226
SE-ON334	SE-ON	88	92	159	165	178	188	259	259	142	152	133	137	190	192	115	117	174	180	144	156	178	178	209	213	119	125	208	222
SE-ON335	SE-ON	104	106	159	161	178	186	269	273	154	162	137	141	194	194	113	115	180	180	148	158	172	178	213	213	115	119	206	218
SE-ON336	SE-ON	104	106	159	161	178	184	273	273	154	162	137	141	194	194	115	115	180	180	150	150	172	178	209	213	119	119	208	218
SE-ON337	SE-ON	88	92	155	159	178	190	271	273	142	144	137	141	192	194	113	117	178	178	140	140	172	174	213	217	-9	-9	222	228
SE-ON338	SE-ON	100	104	159	165	180	188	263	271	138	142	137	137	190	194	113	117	174	176	148	150	166	180	211	213	113	125	208	228
SE-ON339	SE-ON	88	92	155	163	178	184	271	273	142	144	137	141	192	194	113	117	178	178	126	140	172	174	213	217	121	127	222	228
SE-ON340	SE-ON	88	96	159	167	178	186	273	273	140	142	137	141	194	194	113	117	178	180	148	158	178	178	213	213	119	121	220	220
SE-ON341	SE-ON	88	92	155	163	178	178	273	279	142	144	137	141	190	192	115	117	178	178	140	140	172	174	213	217	121	127	222	228
SE-ON342	SE-ON	92	108	161	163	178	178	273	279	144	166	137	141	190	192	101	117	176	178	140	140	172	174	205	217	121	127	208	228
SE-ON343	SE-ON	-9	-9	161	163	178	178	273	273	138	144	137	141	190	192	101	103	176	178	140	140	-9	-9	205	217	121	121	208	228
SE-ON344	SE-ON	88	98	157	159	188	188	269	271	140	152	137	137	194	194	113	115	176	178	140	156	172	180	211	211	117	125	222	228
SE-ON345	SE-ON	104	104	155	161	174	188	273	287	152	156	137	139	190	196	113	115	174	176	140	158	178	180	209	211	119	123	210	230
SE-ON346	SE-ON	104	108	159	161	178	178	273	273	142	142	133	137	192	194	107	107	178	180	140	146	172	176	205	209	-9	-9	-9	-9
SE-ON347	SE-ON	92	104	155	167	178	188	271	273	138	142	137	141	192	194	115	117	178	178	140	140	172	174	207	213	121	127	208	228
SE-ON348	SE-ON	104	104	159	167	180	182	267	279	156	160	137	137	190	194	115	119	178	180	152	158	178	180	209	215	115	121	212	222
SE-ON349	SE-ON	88	104	161	163	178	188	269	291	140	142	133	137	190	194	107	113	178	178	140	140	172	178	209	211	115	117	208	222
SE-ON350	SE-ON	88	100	161	163	176	180	265	273	156	156	137	143	194	194	105	117	174	180	140	158	172	178	211	217	121	125	208	220
SE-ON351	SE-ON	106	106	159	167	184	186	269	273	142	154	137	141	194	194	115	115	174	180	154	158	172	178	213	213	119	119	208	218
SE-ON352	SE-ON	88	100	161	163	178	184	273	273	158	158	137	143	194	194	105	117	174	180	140	140	172	178	211	217	121	125	208	220
SE-ON353	SE-ON	98	108	157	161	178	188	269	273	158	158	133	137	194	198	115	115	176	178	140	140	174	178	211	213	119	127	206	208
SE-ON354	SE-ON	104	104	159	161	178	180	267	279	160	162	137	141	186	194	101	115	176	180	140	158	178	180	211	213	117	121	208	208
SE-ON355	SE-ON	88	108	159	163	178	186	271	279	152	166	137	137	190	190	107	115	176	176	128	140	172	174	217	217	121	127	218	228
SE-ON356	SE-ON	88	104	161	163	178	178	273	273	140	142	137	137	192	194	113	117	178	178	140	158	174	178	211	217	127	127	206	228
SE-ON357	SE-ON	88	100	161	163	178	186	273	283	156	162	133	141	190	194	117	117	178	182	138	152	178	180	213	213	125	127	224	226
SE-ON358	SE-ON	104	104	161	161	178	178	273	289	140	162	133	141	194	194	115	117	176	180	140	158	178	178	211	213	121	123	218	218
SE-ON359	SE-ON	88	104	165	167	180	188	273	273	162	170	137	137	190	194	113	115	172	178	148	154	178	178	209	213	113	119	220	222
SE-ON360	SE-ON	94	98	159	163	178	184	267	289	152	156	139	141	190	194	115	117	172	178	158	158	-9	-9	205	217	115	117	212	212
SE-ON361	SE-ON	88	96	159	167	180	188	269	269	140	156	137	141	186	194	115	115	176	180	158	158	172	180	211	213	117	119	212	220
SE-ON362	SE-ON	104	106	157	159	176	180	273	283	138	138	141	147	192	194	115	117	178	178	154	154	180	180	209	213	119	127	218	222
SE-ON363	SE-ON	88	104	159	167	180	182	267	279	142	160	137	139	190	194	115	119	178	180	146	158	180	180	209	215	115	121	222	222
SE-ON364	SE-ON	88	88	161	167	178	186	273	279	162	162	139	141	194	194	113	117	174	176	146	148	170	178	217	217	119	125	206	208
SE-ON365	SE-ON	88	104	159	167	180	180	273	285	142	156	137	141	190	194	113	117	174	178	138	148	178	178	209	213	117	119	208	218
SE-ON366	SE-ON	88	88	157	157	180	186	-9	-9	140	142	137	141	-9	-9	113	115	172	178	140	140	176	178	211	213	119	121	220	220
SE-ON367	SE-ON	100	106	163	167	178	184	267	273	154	156	137	137	188	192	111	113	174	178	142	156	174	178	215	217	123	125	218	220
SE-ON368	SE-ON	92	108	159	165	178	186	273	285	154	170	139	141	188	190	105	115	176	178	140	144	178	178	209	215	123	127	206	206
SE-ON369	SE-ON	98	106	163	163	178	188	295	295	-9	-9	137	141	194	194	111	117	178	178	140	142	174	178	211	217	123	123	220	220
SE-ON370	SE-ON	88	104	159	161	186	188	267	273	168	168	137	141	190	194	113	117	178	180	140	154	176	180	209	211	123	123	206	220
SE-ON371	SE-ON	88	106	159	167	178	180	281	289	138	154	137	141	186	194	107	117	174	178	124	138	178	178	209	219	117	119	222	214
SE-ON372	SE-ON	88	108	159	167	178	180	285	287	-9	-9	139	141	190	192	115	117	176	176	156	156	-9	-9	215	217	121	127	208	224
SE-ON373	SE-ON	88	88	161	161	186	188	271	283	138	140	133	137	180	192	105	115	178	180	140	154	178	180	209	211	119	123	208	224
SE-ON374	SE-ON	96	106	163	167	180	186	265	283	140	140	133	139	192	194	111	113	176	182	128	150	178	180	217	217	119	127	208	212
SE-ON375	SE-ON	88	88	161	165	178	182	265	293	-9	-9	139	143	194	194	115	117	178	178	138	146	174	178	217	219	113	129	222	226
SE-ON376	SE-ON	88	108	167	167	180	186	279	295	-9	-9	133	137	186	194	105	105	174	178	150	158	174	178	211	213	121	123	222	222
SE-ON377	SE-ON	102	104	159	167	176	180	273	291	-9	-9	139	143	190	194	115	115	174	178	140	140	174	174	207	213	121	123	206	208
SE-ON378	SE-ON	88	88	159	167	186	186	275	285	-9	-9	137	139	190	194	113	115	176	178	142	154	178	178	213	213	115	123	206	208
SE-ON379	SE-ON	88	88	159	159	180	186	271	273	142	158	141	141	194	198	113	115	172	172	140	140	-9	-9	211	213	119	121	220	220
SE-ON380	SE-ON	88	98	165	165	180	188	-9	-9	170	170	137	137	194	194	111	115	174	180	148	152	178	178	213	213	119	119	224	224
SE-ON381	SE-ON	100	104	157	167	176	188	275	279	160	170	137	141	190	190	115	119	176	178	140	140	-9	-9	211	211	121	123	206	218
SE-ON382	SE-ON	96	106	159	167	178	186	273	279	-9	-9	139	141	190	192	113	117	176	178	140	140	174	178	209	213	121	127	208	220
SE-ON383	SE-ON	106	108	159	167	176	182	273	273	138	142	137	137	186	194	117	117	174	178	140	146	176	180	209	219	121	123	224	224
SE-ON384	SE-ON	98	108	159	167	178	180	269	271	154	164	139	141	194	194	109	117	174	178	138	140	178	178	209	209	119	119	210	222
SE-ON385	SE-ON	100	108	161	167	174	188	279	283	148	162	139	139	190	190	117	119	174	178	138	140	174	178	209	215	125	130	212	220
SE-ON386	SE-ON	86	106	159	161	178	188	273	293	142	142	137	139	192	194	107	107	178	178	128	144	176	180	205	217	121	125	212	220
SE-ON387	SE-ON	92	104	159	159	178	186	273	279	154	158	137	141	194	194	111	113	174	176	140	142	178	178	211	219	121	123	212	218
SE-ON388	SE-ON	100	108	157	167	180	188	271	279	170	170	137	139	190	194	117	117	178	178	140	140	178	180	205	213	121	129	206	218
SE-ON389	SE-ON	88	96	159	159	178	180	273	285	156	170	139	141	194	198	117	117	176	178	140	148	172	174	205	211	115	119	206	216
SE-ON390	SE-ON	88	100	159	159	186	186	271	281	146	156	137	141	188	192	115	117	176	180	138	140	178	178	209	217	119	125	208	212
SE-ON391	SE-ON	88	88	163	165	178	188	273	285	146	156	137	141	190	190	105	117	174	176	138	140	176	178	209	215	121	127	208	224
SE-ON392	SE-ON	88	106	159	159	182	186	263	271	142	152	137	139	190	194	113	115	178	184	142	144	178	178	207	215	121	125	206	208
SE-ON393	SE-ON	88	104	163	163	178	186	285	289	138	146	137	139	186	194	115	115	176	180	124	156	174	178	207	213	123	125	206	212
SE-ON394	SE-ON	88	88	159	159	178	180	273	293	158	166	139	141	186	190	115	115	176	180	140	140	174	178	211	213	117	121	220	228
SE-ON395	SE-ON	100	108	161	163	178	178	277	287	140	164	137	147	190	194	101	107	176	178	140	158	178	178	213	215	119	125	220	220
SE-ON396	SE-ON	100	104	159	165	176	182	263	279	140	142	137	141	190	192	111	117	174	178	148	150	176	182	213	213	119	121	218	218
SE-ON397	SE-ON	96	104	161	167	186	186	281	299	146	152	137	145	190	194	115	117	174	178	140	152	178	178	209	211	115	115	200	206
SE-ON398	SE-ON	88	100	159	159	174	178	269	295	156	158	137	139	186	194	107	117	178	180	140	144	178	182	211	217	117	123	222	228
SE-ON399	SE-ON	106	108	157	159	182	186	273	277	154	158	133	141	186	194	105	117	178	180	140	148	178	178	211	213	119	127	211	211
SE-ON400	SE-ON	100	106	159	167	174	182	265	295	156	162	137	139	186	186	105	107	174	180	140	140	178	182	217	217	121	123	226	228
SE-ON401	SE-ON	88	88	159	163	178	186	273	281	140	156	137	141	190	194	115	117	168	176	138	148	174	176	209	209	121	121	208	212
SE-ON402	SE-ON	96	104	157	159	178	186	265	273	156	166	139	139	186	194	107	113	174	174	142	158	178	182	205	211	121	121	200	218
SE-ON403	SE-ON	88	92	159	163	178	178	273	273	156	158	137	141	190	194	105	113	174	176	140	140	178	178	209	219	121	123	212	224
SE-ON404	SE-ON	88	106	163	163	182	184	265	291	144	162	137	141	186	194	115	117	176	178	138	142	178	178	213	217	121	121	208	222
SE-ON405	SE-ON	88	104	159	159	186	188	271	283	156	158	137	137	190	194	105	111	174	174	140	142	178	178	211	215	121	121	212	224
SE-ON406	SE-ON	100	108	161	167	180	188	271	299	154	156	137	151	194	194	113	113	178	180	146	148	176	176	211	213	119	123	226	228
SE-ON407	SE-ON	86	104	159	161	180	182	275	295	138	142	137	141	188	190	107	111	176	178	148	152	178	178	211	215	123	125	212	220
SE-ON408	SE-ON	88	88	159	163	184	184	273	291	144	170	137	141	194	194	107	115	176	176	138	140	178	178	213	217	119	121	212	222
SE-ON409	SE-ON	96	106	159	167	182	186	265	273	154	166	137	139	186	196	115	115	174	178	128	142	178	180	205	217	121	121	218	220
SE-ON410	SE-ON	104	106	157	159	182	186	277	281	144	158	141	141	186	194	105	115	180	180	140	148	178	178	209	211	125	127	220	220
SE-ON411	SE-ON	104	104	157	159	174	178	265	273	142	172	139	139	192	192	115	119	176	180	138	152	-9	-9	209	209	119	123	228	230
SE-ON412	SE-ON	104	106	161	161	178	182	-9	-9	140	158	137	137	192	194	105	115	176	178	136	138	174	178	217	217	117	123	-9	-9
SE-ON413	SE-ON	104	108	159	163	178	186	277	277	142	158	137	141	186	194	115	115	176	178	146	148	174	178	217	221	127	127	214	216
SE-ON414	SE-ON	92	104	159	167	182	186	259	269	158	160	135	137	190	194	105	107	174	178	138	154	178	180	211	211	123	123	208	212
SE-ON415	SE-ON	88	108	155	159	182	186	265	265	154	158	137	143	190	194	105	117	174	178	126	138	172	178	205	213	115	123	206	208
SE-ON416	SE-ON	88	88	163	167	174	188	273	273	138	142	139	141	194	194	113	115	178	178	138	140	178	178	213	213	113	123	208	220
SE-ON417	SE-ON	-9	-9	161	167	174	180	271	273	138	158	137	141	194	198	115	117	174	174	138	144	176	178	211	215	123	123	-9	-9
SE-ON418	SE-ON	88	88	159	163	178	188	271	273	140	172	137	137	190	190	113	119	180	184	140	148	178	178	211	213	115	119	200	220
SE-ON419	SE-ON	98	98	159	159	178	188	-9	-9	142	158	139	139	194	194	105	117	174	178	140	140	174	174	217	219	125	127	218	230
SE-ON420	SE-ON	88	108	159	163	178	184	273	277	138	162	137	141	192	194	107	115	174	176	140	148	174	178	211	217	119	119	220	226
SE-ON421	SE-ON	100	104	159	161	178	186	273	279	158	172	143	143	190	192	105	123	178	178	140	148	172	172	205	213	125	125	212	212
SE-ON422	SE-ON	104	108	159	161	176	188	287	287	140	160	141	141	192	194	111	115	174	178	144	148	178	182	207	213	119	119	212	218
SE-ON423	SE-ON	88	104	159	161	178	180	271	273	138	142	139	141	194	194	107	117	174	180	-9	-9	174	176	-9	-9	115	123	220	222
SE-ON424	SE-ON	88	100	159	163	180	186	269	273	138	148	139	141	192	194	107	115	174	178	138	140	178	178	205	217	119	121	224	224
SE-ON425	SE-ON	88	100	159	161	178	178	-9	-9	156	162	137	139	-9	-9	105	117	178	180	138	146	172	178	211	215	115	121	216	224
SE-ON426	SE-ON	104	108	159	167	182	186	-9	-9	138	172	141	143	186	192	115	115	178	180	148	158	176	178	211	215	119	121	206	208
SE-ON427	SE-ON	102	108	159	163	176	188	273	273	142	164	137	141	190	194	103	117	174	176	142	126	180	180	215	217	117	121	200	210
SE-ON428	SE-ON	100	100	163	167	178	188	265	277	140	156	137	141	190	194	115	117	178	178	138	138	178	180	211	215	113	121	200	228
SE-ON429	SE-ON	100	108	163	163	180	186	-9	-9	142	164	137	137	194	196	105	115	176	180	156	156	172	180	205	209	119	125	208	208
SE-ON430	SE-ON	92	100	159	163	184	186	273	287	142	154	135	147	188	194	105	117	178	178	140	158	176	178	211	213	119	121	208	208
SE-ON431	SE-ON	106	108	161	165	176	178	271	273	138	164	135	137	194	194	113	113	174	176	128	140	176	176	211	213	115	121	208	212
SE-ON432	SE-ON	88	106	163	167	186	188	275	285	142	160	137	141	194	194	113	117	176	178	140	142	178	180	213	217	123	125	200	220
SE-ON433	SE-ON	88	100	159	167	178	188	-9	-9	138	160	139	141	194	196	113	117	178	178	140	140	-9	-9	-9	-9	121	123	206	208
SE-ON434	SE-ON	90	108	155	167	178	178	265	285	138	162	137	139	190	194	107	117	176	178	146	158	176	176	207	213	115	113	212	220
SE-ON435	SE-ON	92	96	159	167	178	186	285	293	140	154	141	143	190	190	115	117	176	182	148	148	174	178	211	213	121	125	218	218
SE-ON436	SE-ON	88	106	159	159	176	178	263	273	142	162	137	141	188	194	115	117	176	178	138	140	178	178	209	213	123	123	220	230
SE-ON437	SE-ON	88	104	159	163	178	186	283	283	140	164	137	137	194	194	107	117	174	178	138	148	174	178	209	215	121	123	208	222
SE-ON438	SE-ON	88	100	157	167	178	186	273	273	154	162	141	141	186	186	111	117	174	176	140	144	178	178	209	213	121	127	206	222
SE-ON439	SE-ON	92	104	159	167	184	188	265	269	138	162	141	141	192	194	107	115	176	178	140	148	174	178	215	217	123	123	206	212
SE-ON440	SE-ON	98	100	159	167	180	188	271	273	138	142	133	141	192	196	111	115	166	172	-9	-9	174	180	213	217	121	129	208	218
SE-ON441	SE-ON	88	104	155	163	178	178	265	273	138	138	137	141	190	198	109	115	176	176	140	140	176	178	211	215	121	125	-9	-9
SE-ON442	SE-ON	88	104	159	165	186	186	273	273	138	142	137	141	192	192	109	115	174	176	140	140	176	178	211	215	121	125	224	228
SE-ON443	SE-ON	100	100	161	167	176	180	265	273	160	160	139	141	188	190	115	117	176	178	154	156	174	178	205	211	119	127	208	230
SE-ON444	SE-ON	96	104	159	159	178	180	271	273	156	160	137	139	190	196	107	117	176	180	138	154	178	178	215	217	121	121	210	218
SE-ON445	SE-ON	88	108	161	165	178	180	273	273	138	152	137	141	192	194	115	115	174	178	140	144	178	180	211	215	123	125	212	230
SE-ON446	SE-ON	88	100	159	167	186	186	281	285	140	158	133	133	194	194	115	117	176	178	138	140	174	178	211	217	119	125	220	220
SE-ON447	SE-ON	88	104	161	167	178	184	273	281	138	142	137	141	186	192	107	107	178	178	140	140	178	178	207	213	125	127	220	222
SE-ON448	SE-ON	88	100	159	167	180	186	281	285	140	158	133	133	190	192	115	117	176	178	138	140	174	178	211	217	119	119	220	220
SE-ON449	SE-ON	92	104	159	167	178	178	265	283	142	156	137	137	190	196	105	109	174	176	142	144	178	178	211	217	117	121	206	222
SE-ON450	SE-ON	92	100	159	163	180	186	265	269	146	154	137	139	192	196	107	117	174	180	140	140	178	178	205	205	121	121	208	224
SE-ON451	SE-ON	104	108	163	167	178	188	277	279	148	154	137	137	190	190	115	117	178	178	146	146	178	182	-9	-9	123	127	218	226
SE-ON452	SE-ON	88	104	159	163	180	182	271	275	154	162	133	137	186	190	115	115	176	178	128	140	178	178	211	213	121	125	214	220
SE-ON453	SE-ON	100	104	157	161	184	186	271	273	140	142	135	141	194	194	113	115	174	176	140	156	178	178	211	213	125	125	222	222
SE-ON454	SE-ON	106	108	159	159	176	178	285	285	138	152	141	141	192	194	115	115	178	178	140	140	178	180	213	213	117	123	212	230
SE-ON455	SE-ON	88	100	159	159	186	186	273	295	140	140	133	137	190	192	115	115	176	178	140	146	172	178	207	217	127	129	212	220
SE-ON456	SE-ON	100	104	163	167	180	186	273	275	138	156	133	139	190	192	117	119	176	178	128	140	176	180	213	215	121	127	220	230
SE-ON457	SE-ON	88	98	155	161	176	180	273	273	156	156	137	141	192	194	115	119	174	176	138	138	178	182	209	213	121	127	220	226
SE-ON458	SE-ON	100	104	159	163	180	188	273	275	-9	-9	135	141	194	194	113	115	174	176	144	148	178	178	209	213	121	125	-9	-9
SE-ON459	SE-ON	100	104	163	165	180	188	273	285	156	158	133	141	192	194	107	117	176	180	140	140	174	178	211	217	119	127	222	222
SE-ON460	SE-ON	100	108	161	165	180	180	293	293	138	146	137	137	190	192	115	117	176	176	144	144	178	182	215	215	125	125	230	230
SE-ON461	SE-ON	100	104	159	161	178	180	273	285	140	156	137	137	186	190	115	117	174	176	144	148	178	178	209	213	121	125	218	220
SE-ON462	SE-ON	102	108	163	167	176	186	-9	-9	138	164	137	137	190	196	113	117	174	176	138	140	178	178	215	215	117	123	210	222
SE-ON463	SE-ON	88	96	155	163	178	178	265	273	138	138	137	147	190	198	105	107	174	178	140	148	174	176	211	211	117	125	208	208
SE-ON464	SE-ON	102	110	157	159	178	178	273	273	138	156	141	141	192	194	111	115	176	178	138	140	178	178	213	213	121	127	220	222
SE-ON465	SE-ON	104	106	157	167	176	178	273	295	-9	-9	137	141	188	194	115	117	174	178	138	140	178	182	209	211	117	121	220	230
SE-ON466	SE-ON	106	106	159	161	178	186	269	269	142	160	141	143	188	190	115	115	174	178	138	146	178	178	205	217	119	125	218	218
SE-ON467	SE-ON	88	96	159	165	186	186	-9	-9	138	142	137	147	192	192	105	107	174	178	140	148	174	176	211	211	117	125	208	230
SE-ON468	SE-ON	88	100	155	163	176	186	273	273	156	160	137	139	190	194	107	117	174	178	138	156	178	178	211	213	121	127	212	230
SE-ON469	SE-ON	104	110	155	159	178	186	275	283	152	162	141	141	190	194	111	115	178	178	128	138	178	182	211	211	115	121	220	228
SE-ON470	SE-ON	88	100	159	167	188	188	265	271	138	138	137	139	190	192	109	115	178	182	138	144	178	178	211	211	115	119	212	220
SE-ON471	SE-ON	102	108	159	165	180	186	273	287	138	140	141	141	186	190	115	117	178	180	134	140	176	178	211	213	117	121	220	220
SE-ON472	SE-ON	96	106	155	159	186	188	275	285	152	156	137	139	192	194	115	117	178	178	140	148	178	180	205	211	121	125	208	226
SE-ON473	SE-ON	88	100	159	163	178	186	271	273	138	158	137	141	192	196	109	115	172	178	138	140	174	178	211	213	121	121	200	212
SE-ON474	SE-ON	88	98	159	167	178	186	273	295	138	158	133	137	194	194	115	117	174	178	138	140	180	182	211	215	121	125	208	220
SE-ON475	SE-ON	88	104	159	163	176	180	265	295	140	144	137	141	190	194	115	115	178	180	128	156	174	178	211	213	113	121	208	230
SE-ON476	SE-ON	92	104	167	167	178	180	265	295	142	156	137	139	188	196	117	117	178	178	140	148	178	180	205	213	127	127	206	230
SE-ON477	SE-ON	88	100	159	159	180	186	265	269	138	170	141	141	186	192	107	115	174	174	138	156	174	180	215	217	119	121	218	222
SE-ON478	SE-ON	104	106	159	163	180	188	273	275	138	162	133	137	186	192	113	119	178	180	128	146	176	178	213	217	121	127	208	220
SE-ON479	SE-ON	88	100	159	159	178	182	271	271	142	158	139	141	192	192	115	117	174	176	144	152	178	178	205	215	117	117	206	218
SE-ON480	SE-ON	100	104	159	163	178	186	273	287	142	142	139	141	194	194	115	117	176	180	140	142	178	178	211	217	115	125	208	212
SE-ON481	SE-ON	88	92	163	163	178	180	265	283	156	158	137	137	192	196	105	115	178	180	146	156	174	174	211	211	119	125	208	222
SE-ON482	SE-ON	90	106	161	163	176	178	273	285	142	152	133	139	192	194	115	117	176	178	140	146	178	178	211	217	119	123	208	208
SE-ON483	SE-ON	88	100	159	163	178	186	271	273	138	156	137	141	192	196	109	115	172	178	138	140	176	180	211	213	121	121	212	212
SE-ON484	SE-ON	110	110	159	165	178	178	-9	-9	158	164	139	141	192	194	115	117	174	178	140	158	178	178	213	215	121	127	210	232
SE-ON485	SE-ON	104	104	155	167	178	178	287	293	152	156	137	139	188	194	115	115	174	180	126	142	174	180	213	215	121	127	226	228
SE-ON486	SE-ON	88	100	159	165	186	186	271	285	138	138	137	137	192	192	109	115	176	178	140	144	176	178	213	215	117	121	208	212
SE-ON487	SE-ON	88	88	157	167	176	178	283	285	142	162	141	141	194	196	115	117	176	178	150	152	176	178	209	217	125	127	208	220
SE-ON488	SE-ON	100	104	159	163	178	186	-9	-9	142	142	139	141	194	194	115	117	176	178	140	142	178	178	211	213	113	115	208	212
SE-ON489	SE-ON	88	92	161	167	178	186	289	291	146	156	137	137	190	198	115	117	176	176	140	154	174	178	205	207	123	123	230	230
SE-ON490	SE-ON	88	88	159	167	180	186	283	297	152	166	139	139	190	194	115	117	178	178	148	148	180	180	207	209	121	123	216	220
SE-ON491	SE-ON	104	108	161	167	178	182	287	291	144	158	137	141	188	192	115	117	178	178	152	156	178	178	211	213	121	125	208	222
SE-ON492	SE-ON	88	104	159	163	178	186	269	273	142	162	137	141	190	192	113	115	178	180	140	146	178	178	205	213	113	125	208	216
SE-ON493	SE-ON	88	108	159	159	178	188	277	293	146	156	137	137	194	194	115	119	178	180	148	154	178	180	209	217	119	125	222	224
SE-ON494	SE-ON	104	108	159	161	178	188	271	273	156	160	137	139	194	194	115	117	180	180	140	146	178	178	213	215	115	123	206	208
SE-ON495	SE-ON	-9	-9	159	159	180	180	-9	-9	136	136	133	137	194	194	115	119	176	178	156	158	174	178	205	213	113	119	208	210
SE-ON496	SE-ON	100	108	159	159	178	186	273	279	142	156	137	143	190	194	105	115	176	180	140	148	178	178	205	209	125	125	206	222
SE-ON497	SE-ON	102	108	159	161	180	186	265	273	140	154	137	141	194	194	115	117	176	180	138	140	178	178	207	211	117	123	210	222
SE-ON498	SE-ON	88	102	159	159	178	188	265	273	140	158	137	137	180	190	105	113	178	184	148	148	178	178	205	207	125	125	208	208
SE-ON499	SE-ON	88	88	161	165	174	178	273	285	146	152	139	141	190	194	107	117	176	178	138	140	174	176	213	215	119	127	208	220
SE-ON500	SE-ON	88	100	159	159	178	188	279	293	156	156	137	141	186	190	105	117	178	180	138	154	174	176	209	217	119	121	208	208
SE-ON501	SE-ON	96	106	163	167	178	182	265	273	162	166	137	139	186	194	105	117	174	178	140	142	178	178	209	217	119	121	208	226
SE-ON502	SE-ON	88	106	159	159	186	186	277	281	140	162	137	141	194	194	115	115	168	174	142	148	174	178	209	215	121	125	212	220
SE-ON503	SE-ON	106	106	159	159	180	186	265	277	158	166	137	139	192	194	113	117	180	180	140	142	174	180	205	211	113	121	208	212
SE-ON504	SE-ON	88	88	159	167	174	180	263	273	142	154	137	139	194	194	105	117	174	180	156	158	180	180	209	209	125	125	200	228
SE-ON505	SE-ON	88	106	159	159	178	186	273	295	156	158	137	141	194	196	105	115	176	178	138	148	176	178	209	213	115	119	206	212
SE-ON506	SE-ON	88	104	155	167	180	188	267	279	156	156	133	141	192	194	115	117	176	178	140	158	178	178	213	215	115	119	200	218
SE-ON507	SE-ON	92	104	159	159	174	180	265	287	146	162	137	141	180	196	111	115	174	178	140	156	176	178	209	209	121	123	208	228
SE-ON508	SE-ON	88	106	159	167	178	188	281	289	152	162	137	139	186	190	115	115	174	180	140	152	178	178	209	215	113	125	208	212
SE-ON509	SE-ON	88	88	159	159	184	186	265	273	142	146	133	135	190	192	115	115	174	176	138	156	178	178	217	217	115	127	220	220
SE-ON510	SE-ON	88	104	159	167	178	184	273	285	142	142	135	137	190	194	105	115	174	178	140	142	178	178	213	213	121	121	208	228
SE-ON511	SE-ON	88	88	157	165	180	180	271	277	152	162	133	137	190	196	115	117	176	178	140	156	178	178	205	213	121	129	220	220
SE-ON512	SE-ON	104	104	159	167	182	186	265	273	158	162	133	139	194	194	107	115	178	184	144	146	178	180	213	215	117	119	200	218
SE-ON513	SE-ON	88	92	167	167	186	188	265	281	152	154	141	143	190	196	117	117	176	178	138	158	178	178	211	213	119	123	220	222
SE-ON514	SE-ON	86	106	159	167	178	178	273	279	140	142	133	137	186	192	105	115	178	178	142	158	178	178	207	213	127	127	200	224
SE-ON515	SE-ON	88	98	155	161	178	190	275	281	156	170	137	137	192	194	111	115	178	180	154	156	178	178	209	213	121	121	200	208
SE-ON516	SE-ON	88	104	159	163	180	186	273	275	140	140	137	137	194	194	107	117	178	180	138	140	178	178	211	213	125	125	212	228
SE-ON517	SE-ON	100	104	159	169	178	186	273	287	154	160	137	137	188	194	107	111	178	178	122	144	176	178	215	217	115	123	212	230
SE-ON518	SE-ON	88	98	159	163	180	188	279	281	142	162	137	139	186	194	113	115	180	180	148	152	178	178	209	217	113	127	208	212
SE-ON519	SE-ON	100	104	159	167	186	186	273	281	146	152	137	141	190	194	113	117	176	176	148	152	166	174	213	213	119	127	208	220
SE-ON520	SE-ON	100	104	159	159	174	184	285	285	140	162	137	137	192	192	113	117	174	178	138	158	178	178	211	213	121	125	208	216
SE-ON521	SE-ON	88	104	163	163	180	180	275	283	152	152	141	141	188	194	107	115	176	176	146	152	178	178	203	215	115	121	222	228
SE-ON522	SE-ON	88	98	163	163	178	182	283	283	140	154	137	139	190	198	107	115	176	176	146	152	178	178	203	215	115	121	222	228
SE-ON523	SE-ON	106	106	163	163	180	186	273	283	140	152	133	137	186	192	115	115	176	180	146	156	174	178	209	211	119	125	208	222
SE-ON524	SE-ON	-9	-9	159	159	174	186	281	295	146	154	139	141	192	192	111	115	178	178	140	150	174	174	207	209	123	127	206	228
SE-ON525	SE-ON	-9	-9	159	163	174	178	265	271	138	156	137	137	194	194	113	115	168	180	140	140	178	178	203	215	121	127	206	220
SE-ON526	SE-ON	-9	-9	157	163	174	176	275	275	140	148	137	141	190	192	115	115	-9	-9	122	138	182	182	209	211	119	121	-9	-9
SE-ON527	SE-ON	88	100	159	159	178	186	-9	-9	-9	-9	137	141	186	192	111	115	176	178	146	154	178	178	209	215	125	125	212	220
SE-ON528	SE-ON	-9	-9	159	163	180	180	265	285	146	170	139	141	-9	-9	115	117	176	176	138	140	174	178	209	209	119	125	220	222
SE-ON529	SE-ON	100	104	155	167	174	178	273	275	138	162	137	139	192	196	115	117	176	176	156	158	172	178	209	215	-9	-9	-9	-9
SE-ON530	SE-ON	88	104	165	167	174	178	273	273	146	162	135	139	192	196	113	117	174	176	148	156	172	180	215	215	125	125	208	224
SE-ON531	SE-ON	88	98	155	167	176	180	273	279	140	142	137	147	190	194	113	115	178	182	138	146	174	178	213	213	119	123	206	206
SE-ON532	SE-ON	104	104	161	167	178	180	297	297	162	162	137	139	180	194	115	117	176	178	140	158	178	178	211	217	119	119	206	206
SE-ON533	SE-ON	88	104	161	167	174	178	273	273	138	156	135	137	186	190	115	117	176	180	152	156	172	178	215	217	119	121	208	208
SE-ON534	SE-ON	88	104	159	163	182	186	263	273	162	170	137	137	190	194	105	119	176	178	140	140	178	180	213	213	115	119	208	210
SE-ON535	SE-ON	88	104	161	165	174	184	273	273	152	154	137	139	190	194	105	113	180	180	140	140	178	178	213	213	119	123	210	224
SE-ON536	SE-ON	-9	-9	159	161	178	188	277	279	140	146	139	141	192	194	111	117	178	178	122	140	178	182	213	213	121	125	-9	-9
SE-ON537	SE-ON	104	106	159	161	186	186	273	279	140	170	139	141	190	194	113	117	174	176	122	154	176	180	215	217	115	121	208	218
SE-ON538	SE-ON	104	106	163	167	180	186	265	273	146	170	133	137	190	194	113	115	176	178	140	150	176	178	213	213	119	127	212	220
SE-ON539	SE-ON	-9	-9	-9	-9	174	178	273	275	138	138	137	139	-9	-9	115	117	176	180	156	158	172	178	215	217	119	121	208	222
SE-ON540	SE-ON	104	104	167	167	174	174	273	273	138	162	135	137	190	192	113	117	176	178	156	156	172	174	215	217	121	125	208	220
SE-ON541	SE-ON	104	104	167	167	174	182	265	265	138	152	137	139	190	194	107	117	174	178	140	156	174	180	209	215	121	127	218	220
SE-ON542	SE-ON	104	104	165	167	188	192	271	271	138	162	135	137	190	192	113	117	176	178	156	156	172	174	215	217	121	125	208	220
SE-ON543	SE-ON	88	98	161	163	174	174	273	301	156	156	137	137	194	194	105	115	178	180	140	148	178	180	213	217	125	127	218	220
SE-ON544	SE-ON	96	104	159	167	178	188	265	265	138	156	141	141	194	194	117	117	174	178	140	158	170	180	211	213	125	125	206	206
SE-ON545	SE-ON	88	100	155	159	178	188	273	275	156	162	137	139	194	196	115	115	176	180	140	158	174	178	209	213	115	121	222	228
SE-ON546	SE-ON	88	104	161	163	176	180	289	289	140	140	139	141	194	194	113	117	174	178	140	154	174	176	213	213	121	121	212	218
SE-ON547	SE-ON	104	104	159	163	178	186	273	281	152	158	137	147	194	198	101	107	178	184	140	140	178	178	213	215	123	125	208	208
SE-ON548	SE-ON	104	108	159	167	182	186	265	273	152	152	137	139	194	194	107	113	174	178	140	148	176	180	209	213	125	127	-9	-9
SE-ON549	SE-ON	88	100	159	165	176	182	265	283	146	156	133	141	194	194	111	115	176	178	138	140	174	180	211	213	113	119	206	206
SE-ON550	SE-ON	104	104	157	161	178	178	273	277	138	140	141	141	180	188	115	117	180	180	140	158	178	180	211	213	117	119	220	220
SE-ON551	SE-ON	96	108	159	167	180	184	273	273	156	162	133	137	194	196	105	117	178	180	150	158	178	178	209	213	119	121	206	230
SE-ON552	SE-ON	88	104	163	167	174	188	265	295	146	162	137	143	194	196	111	115	174	180	138	148	176	178	211	215	121	123	208	228
SE-ON553	SE-ON	88	104	159	159	186	186	273	283	142	146	137	137	190	192	105	115	180	180	140	148	178	178	205	219	115	127	220	220
SE-ON554	SE-ON	88	100	159	167	186	186	273	283	142	146	137	137	190	192	117	117	176	176	140	148	178	182	205	207	125	125	208	220
SE-ON555	SE-ON	88	104	159	159	174	182	265	271	156	162	133	141	192	194	111	115	180	182	140	158	176	178	207	217	115	127	222	224
SE-ON556	SE-ON	88	104	159	167	178	180	273	283	138	162	137	139	192	196	113	115	176	180	140	148	174	178	211	215	119	125	220	220
SE-ON557	SE-ON	104	104	159	163	186	188	265	271	140	140	137	143	192	194	109	117	178	178	132	140	166	178	211	217	115	125	206	206
SE-ON558	SE-ON	88	104	159	159	178	186	273	281	138	140	137	141	190	190	113	115	178	178	148	158	180	182	211	213	125	127	212	220
SE-ON559	SE-ON	88	88	161	165	180	186	267	267	154	164	137	137	192	194	111	111	176	182	142	148	174	178	211	213	113	121	224	224
SE-ON560	SE-ON	88	108	155	161	178	180	273	287	138	154	141	141	192	194	113	117	176	178	140	156	178	178	211	213	121	125	220	222
SE-ON561	SE-ON	88	88	159	159	182	186	273	291	140	146	137	141	190	192	115	115	178	178	128	140	178	180	213	215	125	129	206	208
SE-ON562	SE-ON	88	102	155	163	186	186	279	291	152	152	137	141	186	190	115	117	178	180	128	150	176	178	211	217	119	123	206	222
SE-ON563	SE-ON	104	106	159	163	178	186	271	287	138	146	137	137	188	194	115	117	178	182	140	140	178	178	205	217	115	125	206	206
SE-ON564	SE-ON	88	106	161	161	178	184	269	273	138	142	139	141	192	192	117	119	178	178	140	140	176	178	209	215	121	123	208	218
SE-ON565	SE-ON	88	106	159	163	178	180	273	273	138	140	137	139	192	192	113	117	176	178	138	148	176	178	211	213	125	125	206	220
SE-ON566	SE-ON	98	106	159	163	180	186	267	273	140	140	137	141	192	192	111	117	178	178	138	146	176	176	211	217	115	125	206	220
SE-ON567	SE-ON	100	110	159	167	178	178	273	289	140	142	137	141	192	196	113	115	176	176	138	140	178	180	209	209	121	125	208	208
SE-ON568	SE-ON	88	88	157	163	-9	-9	273	273	140	162	137	141	190	192	115	117	176	178	138	148	176	182	211	213	121	125	220	220
SE-ON569	SE-ON	88	106	159	163	174	180	271	273	140	162	137	141	192	192	117	117	178	178	138	138	176	176	211	213	125	125	220	220
SE-ON570	SE-ON	88	92	159	163	174	186	265	279	154	156	133	141	180	194	111	117	176	180	128	142	178	178	211	213	119	121	206	212
SE-ON571	SE-ON	98	106	163	163	186	186	279	291	152	152	133	137	186	190	105	115	176	178	140	148	178	178	211	213	121	123	208	222
SE-ON572	SE-ON	88	100	163	165	178	180	265	287	138	154	137	137	194	194	117	117	176	176	140	148	-9	-9	205	207	125	125	208	220
SE-ON573	SE-ON	98	100	159	165	180	182	273	275	138	142	137	141	194	196	115	115	172	174	140	148	172	178	205	207	121	121	220	220
SE-ON574	SE-ON	96	108	159	159	178	186	273	273	138	152	133	137	188	192	105	117	178	180	150	158	178	178	209	213	119	121	206	230
SE-ON575	SE-ON	88	102	167	167	176	186	265	275	154	160	135	137	192	194	117	117	176	176	138	142	178	178	211	211	119	125	-9	-9
SE-ON576	SE-ON	88	102	163	167	178	188	273	273	138	154	137	141	192	192	115	117	178	180	128	150	178	178	211	217	119	123	206	222
SE-ON577	SE-ON	88	102	163	167	180	186	265	289	138	138	137	141	194	194	115	115	178	178	138	158	174	174	215	215	125	125	206	208
SE-ON578	SE-ON	106	106	159	167	186	188	265	275	152	156	135	137	188	194	101	115	176	178	140	140	172	178	213	217	121	125	208	208
SE-ON579	SE-ON	88	108	159	163	176	180	267	285	156	158	137	137	190	192	113	117	176	180	128	138	178	182	211	211	113	121	220	220
SE-ON580	SE-ON	100	106	155	159	180	186	285	285	152	156	137	137	186	190	115	117	180	182	128	128	176	178	205	211	121	125	212	228
SE-ON581	SE-ON	100	104	161	163	174	180	281	291	138	154	137	141	192	196	117	117	176	178	140	156	172	176	211	213	113	113	210	228
SE-ON582	SE-ON	88	104	159	163	176	180	275	275	158	158	137	141	192	192	115	117	178	180	140	148	178	182	211	213	113	121	208	224
SE-ON583	SE-ON	88	88	159	159	178	186	271	295	152	154	137	137	194	198	115	115	176	180	148	156	174	178	209	213	119	125	208	224
SE-ON584	SE-ON	88	104	163	163	178	180	275	275	140	142	139	141	192	194	111	115	176	176	140	156	174	178	211	215	121	125	206	208
SE-ON585	SE-ON	88	102	159	163	182	188	271	273	142	144	133	137	194	194	115	115	176	178	144	152	178	178	205	211	113	119	222	222
SE-ON586	SE-ON	88	106	159	159	178	182	285	285	140	152	135	135	194	194	115	117	178	180	128	156	174	174	213	213	119	119	208	210
SE-ON587	SE-ON	88	88	159	163	178	182	271	271	140	152	135	137	190	194	115	117	176	180	128	144	172	174	205	213	119	121	210	228
SE-ON588	SE-ON	100	100	159	159	178	188	265	265	138	142	133	143	194	198	113	115	176	178	138	144	178	178	205	213	119	121	206	220
SE-ON589	SE-ON	88	102	159	163	180	188	273	285	138	140	137	137	192	192	117	117	178	180	142	148	178	182	209	211	121	125	206	210
SE-ON590	SE-ON	88	106	159	159	186	188	273	281	152	154	137	137	198	198	115	117	176	176	148	156	178	178	209	213	115	127	208	220
SE-ON591	SE-ON	88	100	163	167	-9	-9	271	281	152	164	133	137	192	194	111	115	176	182	152	152	178	182	211	211	121	123	220	222
SE-ON592	SE-ON	104	108	163	165	180	180	285	291	138	158	141	141	192	196	113	117	176	176	128	140	176	182	205	215	113	117	206	208
SE-ON593	SE-ON	102	104	159	163	174	182	281	283	140	152	137	141	192	198	111	115	176	178	154	158	178	178	211	217	119	119	220	222
SE-ON594	SE-ON	88	100	161	165	178	186	273	295	152	154	137	139	194	194	115	117	178	178	140	152	178	178	205	205	121	121	208	224
SE-ON595	SE-ON	98	108	159	165	178	180	273	283	140	140	135	137	192	194	115	117	176	176	138	156	176	178	211	211	119	121	222	228
SE-ON596	SE-ON	106	106	161	167	178	186	287	295	140	152	137	139	194	196	115	117	176	176	138	140	174	178	211	213	121	127	208	208
SE-ON597	SE-ON	104	108	161	167	-9	-9	283	283	140	154	135	141	190	190	115	117	176	182	148	152	176	178	205	217	113	127	206	228
SE-ON598	SE-ON	88	104	159	163	178	188	263	271	140	156	137	141	190	190	115	117	176	180	144	148	174	174	205	209	115	119	224	228
SE-ON599	SE-ON	100	104	155	159	180	184	279	283	146	152	137	143	190	194	115	115	178	178	140	140	178	178	209	215	123	125	206	212
SE-ON600	SE-ON	104	104	159	163	180	180	263	263	156	158	139	141	192	192	117	119	172	178	140	140	174	182	211	211	121	121	208	224
SE-ON601	SE-ON	88	100	167	167	178	178	271	281	142	152	137	137	192	194	111	111	176	182	140	152	174	182	211	211	121	123	206	220
SE-ON602	SE-ON	98	104	159	161	178	186	271	273	156	158	137	137	192	192	111	117	174	178	146	156	174	178	215	215	119	127	206	214
SE-ON603	SE-ON	88	100	163	165	178	180	265	275	138	138	141	143	194	194	115	117	176	182	138	156	174	178	213	213	125	125	206	212
SE-ON604	SE-ON	100	108	159	159	186	186	269	273	142	158	137	137	194	194	115	115	176	178	138	140	178	180	211	217	113	115	206	222
SE-ON605	SE-ON	88	104	159	163	178	186	269	273	140	140	133	135	194	194	113	117	176	182	138	140	174	176	205	211	121	127	212	228
SE-ON606	SE-ON	88	104	159	159	182	188	263	271	140	152	137	139	190	190	115	115	172	180	140	144	174	178	211	213	119	121	210	220
SE-ON607	SE-ON	88	100	163	163	178	186	273	281	154	154	137	139	190	194	111	115	176	176	126	140	178	178	213	213	121	121	208	220
SE-ON608	SE-ON	96	106	159	159	180	186	269	269	140	154	139	141	186	196	109	117	176	178	140	140	178	178	213	217	121	121	206	206
SE-ON609	SE-ON	88	96	159	159	178	178	-9	-9	152	160	137	141	-9	-9	115	117	176	178	138	146	174	174	209	213	113	123	212	228
SE-ON610	SE-ON	86	92	159	163	-9	-9	271	275	146	152	-9	-9	-9	-9	105	111	176	178	128	146	176	178	209	215	121	125	206	212
SE-ON611	SE-ON	88	98	159	159	178	186	281	281	152	156	131	141	188	194	115	115	176	178	128	146	178	178	213	213	121	125	198	228
SE-ON612	SE-ON	88	96	159	159	186	186	275	277	138	140	137	141	192	196	-9	-9	178	180	128	146	176	178	205	211	-9	-9	206	220
SE-ON613	SE-ON	88	108	159	159	178	180	273	275	152	160	137	141	194	196	115	117	176	176	128	156	174	182	203	215	121	123	204	212
SE-ON614	SE-ON	96	108	159	159	178	180	269	273	164	164	133	141	-9	-9	115	117	176	178	128	156	174	178	209	215	113	115	204	220
SE-ON615	SE-ON	88	100	159	159	178	188	265	279	142	152	139	141	-9	-9	115	117	176	178	140	148	178	178	209	215	115	121	206	206
SE-ON616	SE-ON	86	88	159	159	178	188	-9	-9	132	154	137	141	192	192	115	117	176	178	138	138	172	174	213	215	113	115	204	228
SE-ON617	SE-ON	88	104	155	159	180	188	271	287	142	154	137	137	-9	-9	113	119	176	176	138	148	174	178	213	215	117	123	206	220
SE-ON618	SE-ON	88	110	-9	-9	174	178	-9	-9	140	142	137	137	-9	-9	111	117	176	176	138	158	178	182	209	209	121	121	222	222
SE-ON619	SE-ON	88	88	159	159	178	182	271	271	138	138	137	139	190	194	105	117	176	176	138	142	178	182	211	211	121	121	206	210
SE-ON620	SE-ON	88	104	159	163	178	182	283	303	154	160	137	137	190	190	115	117	178	180	146	158	174	174	205	213	117	121	220	220
SE-ON621	SE-ON	104	108	159	159	178	186	269	289	138	142	137	141	192	192	115	115	176	178	146	156	174	178	211	211	115	125	226	228
SE-ON622	SE-ON	88	108	159	167	178	188	269	281	138	156	133	137	192	194	117	117	176	176	140	158	172	182	209	211	121	127	220	220
SE-ON623	SE-ON	96	100	161	165	178	182	271	281	140	154	137	141	190	192	113	117	178	178	140	148	178	178	205	213	115	121	208	222
SE-ON624	SE-ON	88	106	159	163	186	186	273	283	138	156	137	139	190	194	105	111	178	178	138	140	174	176	205	213	115	121	208	222
SE-ON625	SE-ON	100	104	167	167	176	178	271	303	140	160	133	137	190	192	105	117	176	178	140	140	174	178	211	215	121	123	200	206
SE-ON626	SE-ON	98	108	159	163	174	186	275	283	138	138	133	137	190	192	111	115	-9	-9	138	148	-9	-9	205	211	115	121	212	212
SE-ON627	SE-ON	88	98	161	161	174	174	273	273	160	160	137	145	194	194	107	107	178	180	128	140	180	180	207	211	117	121	208	210
SE-ON628	SE-ON	96	104	161	163	178	184	277	291	154	154	137	139	194	194	113	113	176	178	140	146	178	180	211	211	125	127	212	212
SE-ON629	SE-ON	88	104	167	167	-9	-9	267	267	156	158	133	139	190	194	105	115	176	178	140	140	178	178	209	213	115	119	208	208
SE-ON630	SE-ON	88	88	165	167	184	184	273	273	140	146	137	137	190	190	105	113	180	180	140	140	178	178	213	213	119	119	224	228
SE-ON631	SE-ON	104	108	161	161	174	182	273	273	156	156	137	137	194	194	115	115	178	180	146	148	-9	-9	211	213	119	125	228	228
SE-ON632	SE-ON	88	88	167	167	178	188	273	273	-9	-9	137	137	194	198	115	115	176	176	140	158	178	178	213	217	119	127	216	220
SE-ON633	SE-ON	96	104	165	165	178	184	269	279	140	154	137	139	194	194	115	115	180	180	154	158	180	180	209	211	117	121	228	228
SE-ON634	SE-ON	96	104	159	163	-9	-9	279	293	154	154	137	139	194	194	113	115	176	178	140	158	180	180	211	213	121	125	212	212
SE-ON635	SE-ON	88	94	165	167	178	184	267	271	140	152	137	137	190	194	115	115	176	178	138	158	178	180	211	213	113	119	206	230
SE-ON636	SE-ON	96	104	163	165	180	180	269	273	140	140	141	141	194	194	113	115	178	178	128	148	178	180	209	213	113	121	226	228
SE-ON637	SE-ON	104	108	159	167	178	178	269	279	140	152	141	147	190	194	115	119	174	176	142	146	178	178	213	213	119	119	226	228
SE-ON638	SE-ON	88	100	159	167	178	184	273	273	138	140	133	139	194	194	105	111	176	176	-9	-9	-9	-9	211	213	123	125	214	214
SE-ON639	SE-ON	96	96	159	159	184	186	279	279	152	162	137	147	194	194	113	115	172	174	140	158	176	176	211	213	117	117	220	222
SE-ON640	SE-ON	104	108	159	167	178	178	269	279	152	152	133	141	190	194	113	115	174	180	142	154	178	178	213	213	119	119	228	230
SE-ON641	SE-ON	88	88	161	161	174	182	273	273	154	158	137	145	194	194	115	117	178	180	146	148	-9	-9	209	215	119	121	218	224
SE-ON642	SE-ON	88	90	-9	-9	178	186	271	273	138	156	137	137	194	194	105	117	176	176	132	140	-9	-9	207	215	113	115	220	220
SE-ON643	SE-ON	88	88	159	165	178	178	267	271	138	152	137	139	194	194	105	113	174	178	-9	-9	-9	-9	213	217	119	121	208	220
SE-ON644	SE-ON	88	90	161	161	174	182	273	273	154	156	137	145	194	194	115	117	178	180	146	148	180	180	215	217	117	119	220	220
SE-ON645	SE-ON	100	104	163	167	178	178	267	299	140	162	133	139	194	194	107	115	176	178	140	158	178	178	205	211	125	127	212	212
SE-ON646	SE-ON	104	104	155	167	178	178	277	283	138	156	141	141	194	194	115	115	172	180	140	140	178	178	211	213	119	125	206	218
SE-ON647	SE-ON	96	104	159	167	178	184	273	273	138	140	133	139	194	194	115	115	176	176	138	140	178	180	211	213	113	119	218	228
BP1	BP	106	106	159	159	178	186	273	283	144	144	137	137	188	188	115	115	178	180	156	156	178	178	207	211	125	127	220	228
BP2	BP	88	88	159	167	178	186	273	273	142	142	137	137	188	188	115	115	178	178	156	156	178	178	207	213	127	127	220	222
BP3	BP	88	106	159	159	178	186	273	283	142	144	137	137	188	194	115	115	178	180	156	156	176	178	207	211	127	127	220	222
BP4	BP	88	92	165	167	174	178	283	283	144	144	137	137	-9	-9	115	115	178	180	140	140	178	178	207	213	127	127	222	222
BP5	BP	88	92	159	163	174	178	273	283	142	144	137	137	188	192	115	115	180	180	140	156	176	178	213	213	127	127	222	222
BP6	BP	88	92	159	159	174	178	273	273	142	144	137	137	188	188	115	115	180	180	140	140	178	178	209	209	127	127	222	222
BP7	BP	92	106	163	165	178	178	273	283	144	144	137	137	192	192	115	115	180	180	140	140	178	178	209	213	127	127	222	222
BP8	BP	92	106	159	165	178	178	273	283	142	144	137	137	192	192	115	115	180	180	140	140	176	178	213	213	127	127	222	222
BP9	BP	106	106	159	159	178	178	277	277	142	142	137	137	188	188	115	115	178	178	140	156	178	178	209	209	127	127	222	228
BP10	BP	88	106	165	165	174	178	273	283	144	144	137	137	192	192	115	115	178	180	140	140	178	178	209	213	127	127	222	222
BP11	BP	106	106	159	165	178	178	273	283	144	144	137	137	192	192	115	115	178	180	140	140	178	178	213	213	127	127	222	228
BP12	BP	88	88	159	159	174	178	273	277	144	144	137	137	188	192	115	115	178	180	140	140	178	178	209	213	127	127	220	228
BP13	BP	92	92	-9	-9	178	178	273	283	144	144	137	137	192	192	115	115	180	180	140	140	178	178	-9	-9	113	127	210	222
BP14	BP	92	104	159	163	174	178	273	273	142	156	137	137	192	192	113	115	180	180	156	156	176	178	209	213	117	127	222	222
BP15	BP	88	88	165	167	178	178	273	273	142	156	137	137	192	194	115	115	180	180	140	156	178	178	213	213	127	127	222	222
BP16	BP	92	106	167	167	178	178	273	283	142	144	137	137	192	192	115	115	178	180	140	156	178	178	215	215	117	127	220	222
BP17	BP	96	106	163	163	178	178	273	273	142	156	137	141	188	192	115	115	178	180	140	156	176	178	207	209	123	127	210	222
BP18	BP	88	88	163	163	174	188	273	283	142	144	137	137	192	194	113	115	172	178	156	156	178	178	207	213	123	127	210	222
BP19	BP	88	88	163	167	174	188	273	273	156	156	137	137	192	192	113	115	178	180	140	156	178	178	207	213	113	127	210	222
BP20	BP	88	92	159	165	174	188	273	273	142	142	137	141	192	194	115	117	172	180	156	156	178	180	207	209	113	127	210	222
BP21	BP	88	88	165	167	178	186	273	273	144	156	137	137	192	192	115	115	180	180	140	156	178	178	213	213	115	127	220	222
BP22	BP	106	106	159	167	174	178	273	283	142	144	137	137	192	192	115	115	178	180	156	156	176	178	213	215	127	127	222	228
BP23	BP	88	106	159	165	176	178	273	273	142	144	137	137	192	192	115	115	178	180	140	156	176	178	209	209	127	127	222	222
BP24	BP	96	96	163	163	174	174	273	273	144	156	137	137	194	194	111	115	176	178	156	156	178	180	213	213	127	127	210	220
BP25	BP	92	96	159	163	174	184	273	273	142	156	137	137	192	194	111	117	176	178	156	156	178	178	207	213	123	127	210	228
BP26	BP	88	106	159	165	178	184	273	283	142	144	137	141	192	194	115	115	176	180	140	156	178	178	207	209	113	127	220	222
BP27	BP	88	92	163	167	174	178	273	283	144	156	137	137	192	192	113	113	178	180	156	156	178	178	209	213	125	127	222	228
BP28	BP	92	106	-9	-9	178	178	273	283	142	144	137	137	192	192	113	115	178	180	140	156	176	178	209	213	127	127	222	222
BP29	BP	88	106	159	163	178	178	273	277	142	156	137	137	192	192	115	115	180	180	140	156	178	178	209	215	125	127	222	222
BP30	BP	92	96	163	163	174	178	273	283	142	144	137	137	192	194	113	115	180	180	156	156	178	180	207	209	123	127	222	222
BP31	BP	88	106	159	163	174	178	273	283	142	156	137	137	192	192	113	115	178	180	140	140	176	176	209	215	125	127	222	228
BP32	BP	88	88	165	167	174	178	273	277	144	156	137	137	192	192	115	115	180	180	140	140	178	178	209	213	117	127	220	222
BP33	BP	88	88	163	163	174	178	273	283	144	156	137	137	192	192	115	115	178	180	140	156	176	178	209	215	125	127	222	228
BP34	BP	88	92	-9	-9	178	178	273	273	142	144	137	137	188	188	115	115	178	180	140	156	178	178	209	209	125	127	222	228
BP35	BP	92	106	159	163	-9	-9	273	273	144	144	137	137	192	194	113	115	180	180	156	156	178	180	209	213	123	127	222	222
BP36	BP	88	88	165	165	178	178	-9	-9	144	144	137	137	192	194	115	115	178	178	140	140	-9	-9	209	209	127	127	222	222
BP37	BP	88	88	159	163	174	188	273	283	142	144	137	137	192	192	115	115	178	178	140	156	176	178	209	213	125	127	222	228
BP38	BP	88	92	163	163	174	178	273	283	144	156	137	137	192	194	113	115	178	180	140	156	176	178	209	215	125	125	228	228
BP39	BP	88	106	159	159	-9	-9	273	283	-9	-9	137	137	192	194	115	115	178	180	140	140	-9	-9	209	209	127	127	222	222
BP40	BP	88	96	159	159	178	188	273	277	142	142	137	137	192	194	115	115	172	178	156	156	178	178	207	213	123	127	220	228
BP41	BP	88	92	165	165	178	188	273	273	142	144	137	137	192	192	115	117	172	180	140	156	178	180	209	209	113	127	210	222
BP42	BP	92	106	159	163	174	178	277	283	142	156	137	137	188	192	113	115	178	180	140	156	178	178	209	209	115	127	222	228
BP43	BP	92	92	159	163	178	184	273	273	142	156	137	137	192	192	115	115	176	180	156	156	178	178	213	213	123	127	220	222
BP44	BP	88	88	159	165	178	188	273	277	142	156	-9	-9	192	194	113	115	172	178	140	156	178	180	207	213	123	125	220	228
BP45	BP	92	92	159	163	178	184	-9	-9	-9	-9	137	137	192	192	113	115	180	180	156	156	178	178	209	209	115	127	222	228
BP46	BP	88	104	159	165	174	186	273	283	-9	-9	137	137	192	192	115	115	178	180	140	156	178	178	209	213	125	127	222	228
BP47	BP	92	96	163	163	174	184	273	273	142	156	137	137	188	194	115	115	176	180	156	156	178	178	209	213	119	127	220	222
BP48	BP	88	92	159	159	188	188	273	273	142	142	137	141	192	194	115	117	176	178	156	156	180	180	207	207	125	127	220	228
BP49	BP	88	106	159	159	178	178	273	277	140	142	137	137	186	192	113	113	178	180	156	156	176	176	209	213	127	127	220	220
BP50	BP	104	104	159	159	174	178	277	277	156	156	137	137	186	192	115	115	178	180	140	156	178	178	213	213	117	125	222	228
BP51	BP	88	104	159	167	174	178	277	277	144	144	137	137	186	192	115	115	178	180	140	156	178	178	213	213	117	125	222	228
BP52	BP	88	88	159	159	174	188	273	277	140	142	137	141	186	194	115	115	172	178	156	156	180	180	207	213	113	127	220	222
BP53	BP	88	106	159	159	174	178	273	273	140	142	137	137	188	192	115	115	178	180	140	156	176	178	209	213	127	127	222	222
BP54	BP	88	106	159	165	178	178	273	273	144	144	137	137	192	194	113	115	178	180	156	156	176	178	-9	-9	117	127	222	222
BP55	BP	104	88	159	159	174	178	277	277	140	142	137	137	188	192	115	115	178	180	138	156	178	178	213	213	117	125	222	228
BP56	BP	88	106	159	159	178	178	273	277	140	142	137	137	188	192	113	113	178	180	156	156	176	176	209	213	117	125	222	228
BP57	BP	104	104	159	159	174	178	277	277	156	156	137	153	188	192	115	115	178	180	138	156	178	182	213	213	117	117	222	228
BP58	BP	92	106	163	165	174	178	273	273	142	156	137	137	188	192	115	115	178	180	156	156	178	178	209	209	127	127	222	222
BP59	BP	88	104	163	167	174	178	273	273	144	144	137	137	188	192	115	115	178	180	156	156	176	178	209	213	117	127	222	222
BP60	BP	88	106	165	167	174	178	273	283	142	156	137	137	188	192	115	115	178	180	140	156	176	176	209	215	125	127	220	222
BP61	BP	106	106	159	159	178	178	273	273	144	144	137	137	188	194	115	115	178	180	140	156	176	178	209	209	117	127	222	222
BP62	BP	106	106	159	163	178	178	273	277	140	142	137	137	188	194	113	113	178	178	156	156	178	178	209	213	127	127	220	220
BP63	BP	88	92	159	159	174	178	273	277	140	142	133	137	192	192	115	115	178	180	140	156	178	178	209	209	127	127	220	222
BP64	BP	88	106	159	159	174	178	-9	-9	142	142	137	137	192	192	115	115	178	180	138	156	178	178	213	213	127	127	222	228
BP65	BP	88	92	159	163	174	174	283	283	140	142	137	137	192	192	115	115	178	180	138	156	176	178	213	213	127	127	222	222
BP66	BP	88	92	163	167	174	178	273	283	140	142	137	137	192	192	113	115	178	180	140	156	176	178	209	215	125	127	222	228
BP67	BP	88	96	163	163	174	188	273	273	140	142	137	137	192	194	113	115	172	178	156	156	178	180	207	209	123	125	220	228
BP68	BP	88	88	159	163	174	184	273	273	140	142	137	137	192	194	113	117	172	180	156	156	178	180	207	209	113	125	210	222
BP69	BP	88	96	159	163	174	188	273	283	140	142	137	137	192	194	113	115	172	178	156	156	176	178	207	209	123	125	220	228
BP70	BP	88	96	159	163	174	184	273	283	140	142	137	137	192	194	115	117	176	180	140	156	178	180	207	209	123	125	220	228
BP71	BP	92	96	159	167	174	174	273	283	140	142	137	141	192	194	113	117	172	180	140	156	176	180	207	215	113	127	210	228
BP72	BP	88	88	-9	-9	178	188	-9	-9	140	142	137	141	192	194	115	115	172	178	140	156	180	180	207	213	123	125	220	228
BP73	BP	106	106	163	167	178	178	273	277	140	142	137	137	192	194	113	113	178	178	156	156	178	178	209	213	127	127	220	228
BP74	BP	92	106	163	167	174	188	273	273	140	142	137	141	192	194	115	117	176	180	156	156	178	178	207	213	113	125	210	228
BP75	BP	88	96	159	159	178	184	273	283	140	142	137	137	194	194	115	115	176	180	156	156	178	178	209	209	113	127	210	222
BP76	BP	88	106	159	159	178	188	273	273	140	142	137	137	192	194	115	117	172	178	154	154	178	178	207	209	119	123	220	222
BP77	BP	104	106	159	167	174	174	273	277	144	144	137	137	188	188	115	115	178	180	140	156	178	178	213	213	117	127	222	222
BP78	BP	88	92	159	163	178	178	273	277	140	142	137	137	188	192	115	115	180	180	140	156	176	178	209	209	127	127	222	222
BP79	BP	88	106	159	163	178	178	273	283	142	156	137	137	188	192	113	115	178	180	140	156	176	178	209	213	125	127	222	228
BP80	BP	106	106	159	163	178	178	273	277	140	142	137	137	188	192	115	115	178	180	156	156	176	178	209	209	127	127	222	228
BP81	BP	106	106	163	163	174	178	273	277	140	142	137	137	188	192	115	115	178	180	156	156	176	178	209	215	117	127	220	228
BP82	BP	88	106	165	165	178	178	273	277	144	144	137	137	188	192	113	115	178	180	140	140	178	178	209	209	117	127	222	228
BP83	BP	88	92	165	167	178	178	273	283	144	144	137	137	188	192	115	115	178	180	140	156	178	178	211	213	117	125	222	228
BP84	BP	88	106	159	159	178	178	273	277	140	142	137	137	188	194	113	115	178	180	156	156	176	178	209	209	117	127	220	220
BP85	BP	88	106	159	159	186	186	273	277	140	142	137	137	188	194	113	115	178	180	156	156	176	178	209	209	127	127	222	228
BP86	BP	88	106	159	163	174	184	273	273	140	142	137	141	188	194	113	115	172	180	156	156	178	180	209	209	123	127	220	222
BP87	BP	92	106	159	167	174	178	277	283	140	142	137	137	188	194	115	115	178	180	140	156	176	178	209	209	125	127	222	228
BP88	BP	88	88	159	159	174	178	273	283	140	142	137	137	192	192	115	115	178	178	156	156	178	178	213	213	127	127	222	222
BP89	BP	88	106	159	159	174	174	273	277	140	142	137	137	192	192	115	115	176	178	156	156	178	178	209	213	127	127	228	228
BP90	BP	88	106	159	159	174	178	273	277	144	144	137	137	192	192	115	115	178	180	140	156	178	178	213	213	125	127	222	228
BP91	BP	88	88	159	163	174	178	273	283	140	142	137	137	192	192	113	115	178	180	140	156	178	178	209	215	127	127	222	228
BP92	BP	92	106	159	163	174	178	273	273	140	142	137	137	192	192	113	115	178	180	156	156	176	178	209	215	127	127	222	228
BP93	BP	88	92	159	163	178	178	273	273	144	144	137	137	192	192	115	115	178	180	140	156	-9	-9	-9	-9	127	127	222	228
BP94	BP	88	92	159	165	174	186	273	277	140	142	137	137	192	192	115	115	178	180	140	156	178	178	213	213	127	127	220	222
BP95	BP	104	106	159	167	174	178	273	277	140	142	137	137	192	192	115	115	178	180	140	156	176	178	209	213	125	125	220	222
BP96	BP	92	106	159	159	178	178	273	277	140	142	137	137	188	192	113	115	178	180	140	156	-9	-9	209	215	127	127	220	228
BP97	BP	88	104	163	165	174	178	277	283	144	144	137	137	192	192	113	115	176	178	140	156	178	178	209	213	125	127	228	228
BP98	BP	92	92	165	167	178	178	273	273	144	144	137	137	192	192	113	115	178	180	140	156	178	178	209	213	127	127	222	222
BP99	BP	88	106	159	159	174	184	273	283	140	142	137	137	192	194	113	115	178	180	140	156	178	178	209	215	117	127	220	222
BP100	BP	88	92	159	159	178	178	277	277	144	144	137	137	192	194	115	115	178	180	156	156	178	178	209	213	117	127	220	228
BP101	BP	88	88	159	163	174	184	273	273	140	142	137	137	192	194	115	115	172	180	156	156	176	180	207	209	123	125	220	228
BP102	BP	88	88	159	165	178	178	277	277	144	144	137	137	192	194	115	115	180	180	140	156	178	178	209	213	117	127	228	228
BP103	BP	88	92	159	165	178	178	273	277	144	144	137	137	192	194	115	115	178	178	140	156	178	178	209	213	117	127	220	228
BP104	BP	-9	-9	159	167	178	188	273	273	140	142	137	137	192	194	113	115	180	180	140	156	-9	-9	207	215	125	127	220	222
BP105	BP	88	92	159	159	174	174	273	277	140	142	137	137	188	192	115	115	178	180	140	156	178	178	213	213	127	127	222	222
BP106	BP	92	104	159	159	174	178	277	283	140	142	137	137	188	192	115	115	178	180	156	156	178	178	213	213	117	127	222	228
BP107	BP	88	104	159	159	174	178	273	283	144	144	137	141	188	192	113	117	172	180	146	156	176	178	209	213	123	127	210	222
BP108	BP	88	92	159	159	178	178	273	277	144	144	137	137	188	192	115	115	178	178	140	156	178	178	209	215	119	127	220	220
BP109	BP	92	96	159	163	174	188	273	283	142	144	137	137	192	194	115	115	176	180	140	156	178	180	207	213	123	127	220	222
BP110	BP	88	92	159	159	178	186	277	277	144	156	137	137	188	192	115	115	178	178	140	146	178	178	209	213	119	127	220	228
BP111	BP	104	106	167	167	174	178	273	283	144	144	137	137	192	192	115	115	178	180	140	156	178	178	213	215	127	127	220	222
BP112	BP	88	88	159	163	174	186	273	277	142	156	137	137	188	192	113	115	180	180	156	156	178	178	213	213	117	127	220	228
BP113	BP	88	88	159	159	178	186	277	283	142	144	137	137	188	188	115	115	178	178	146	156	178	178	209	213	117	119	220	228
BP114	BP	92	92	159	159	178	178	277	283	144	144	137	137	192	192	115	115	178	180	154	154	178	178	209	213	119	127	220	222
BP115	BP	88	96	159	159	174	178	277	283	144	144	137	137	194	194	115	115	176	178	156	156	-9	-9	209	213	123	127	220	220
BP116	BP	88	106	165	167	174	178	273	277	144	156	137	137	188	192	115	115	178	180	140	140	-9	-9	209	213	117	125	222	222
BP117	BP	106	106	163	167	174	188	273	273	142	144	137	137	192	192	115	115	180	180	156	156	176	178	207	215	125	127	220	222
BP118	BP	88	88	159	163	174	178	273	277	144	156	137	137	192	192	115	115	178	180	146	156	178	178	213	213	119	127	228	228
BP119	BP	104	106	159	167	174	178	277	283	144	144	137	137	192	192	113	115	178	180	140	140	178	178	209	213	127	127	222	222
BP120	BP	88	92	159	159	174	178	273	283	144	156	137	137	192	192	115	115	180	180	156	156	178	178	209	213	125	127	222	222
BP121	BP	88	92	159	163	174	178	277	283	156	156	137	137	192	192	115	115	178	180	140	140	176	178	207	211	125	127	228	228
BP122	BP	88	106	159	159	178	186	277	283	142	142	137	137	188	192	115	115	180	180	156	156	176	178	207	213	117	127	220	222
BP123	BP	88	106	159	163	178	178	273	283	142	142	137	137	188	192	115	115	178	180	156	156	176	176	207	213	125	127	222	222
BP124	BP	88	96	163	163	178	188	273	283	142	144	137	137	192	194	115	115	176	178	140	140	176	180	207	211	123	125	222	228
BP125	BP	88	88	159	159	174	174	277	277	144	144	137	137	192	192	115	115	178	180	140	140	178	178	207	211	127	127	222	222
BP126	BP	92	92	165	167	178	188	273	273	142	156	137	137	192	194	115	115	178	180	156	156	178	178	207	211	113	127	208	222
BP127	BP	88	96	159	159	178	188	273	277	142	142	137	137	192	194	115	115	172	180	156	156	178	178	205	205	113	127	208	228
BP128	BP	92	106	159	159	174	178	277	283	142	156	137	137	188	192	113	115	178	180	156	156	178	178	207	207	115	127	228	228
BP129	BP	88	106	159	159	178	178	277	283	142	142	137	137	188	188	115	115	178	180	140	140	176	178	207	211	127	127	222	222
BP130	BP	88	88	159	163	174	188	273	283	142	144	137	137	192	194	115	115	-9	-9	-9	-9	178	178	205	211	123	127	-9	-9
BP131	BP	88	106	159	163	178	178	273	273	142	142	137	137	188	192	115	115	180	180	156	156	-9	-9	207	213	127	127	220	222
BP132	BP	88	96	159	159	178	184	273	277	142	142	137	137	192	192	115	115	176	178	156	156	178	178	205	205	119	127	220	222
BP133	BP	88	106	159	159	174	178	273	277	144	144	137	137	188	192	115	115	178	178	140	156	178	178	207	211	127	127	222	222
BP134	BP	92	92	159	159	174	188	277	283	144	156	137	137	192	194	115	115	176	180	156	156	178	180	207	211	115	123	222	228
BP135	BP	88	92	159	159	178	188	273	273	142	144	137	137	192	194	115	115	176	178	156	156	178	178	205	205	127	127	220	222
BP136	BP	88	88	163	163	174	178	283	283	144	156	137	137	192	192	113	115	178	180	140	156	176	178	207	213	125	125	228	228
BP137	BP	88	88	159	167	174	186	273	273	142	142	137	137	192	192	115	115	180	180	140	156	178	178	207	211	117	127	222	222
BP138	BP	88	92	159	167	178	186	273	273	142	156	137	137	192	192	115	115	178	180	156	156	176	178	207	207	119	127	222	222
BP139	BP	88	106	159	163	178	186	273	283	142	144	137	137	188	192	115	115	180	180	156	156	176	178	207	213	127	127	220	222
CI1	Cockburn Island	100	100	159	159	178	186	267	289	142	142	137	141	190	190	115	115	176	180	156	156	178	182	209	209	-9	-9	208	208
CI2	Cockburn Island	88	100	159	159	174	176	273	289	140	140	133	141	190	198	115	115	176	180	150	156	178	182	207	207	-9	-9	208	220
CI3	Cockburn Island	88	88	159	159	174	174	289	289	142	142	139	141	192	198	115	115	176	180	140	156	178	180	205	207	-9	-9	204	204
CI4	Cockburn Island	86	98	163	167	184	186	267	289	140	156	137	139	194	198	115	115	180	180	156	156	182	182	207	209	-9	-9	204	208
CI5	Cockburn Island	88	100	159	163	176	184	271	289	140	154	141	141	196	198	115	115	176	180	150	156	180	182	207	207	-9	-9	218	218
CI6	Cockburn Island	100	100	159	167	176	178	289	289	140	142	133	141	190	198	115	115	180	180	138	150	178	182	207	209	-9	-9	208	214
CI7	Cockburn Island	88	88	159	159	176	178	271	289	140	142	137	141	190	198	115	115	180	180	150	156	178	182	207	209	-9	-9	208	218
CI8	Cockburn Island	88	100	159	159	174	178	267	289	140	142	139	141	190	194	115	115	180	180	156	156	182	182	209	209	-9	-9	204	208
CI9	Cockburn Island	88	88	159	159	176	184	287	301	152	156	133	139	190	196	115	115	178	180	138	150	178	180	207	209	-9	-9	204	204
CI10	Cockburn Island	88	100	159	167	178	184	267	289	142	156	137	141	190	192	115	115	176	176	156	156	182	182	209	209	-9	-9	204	208
CI11	Cockburn Island	88	88	163	163	176	190	289	289	140	156	133	141	192	196	115	115	176	180	150	150	180	182	207	207	-9	-9	204	218
CI12	Cockburn Island	86	86	163	163	176	190	289	289	138	156	131	139	192	196	115	115	176	180	150	150	180	182	207	207	-9	-9	204	218
CI13	Cockburn Island	92	100	159	163	184	186	273	273	140	154	133	141	190	192	115	115	176	176	140	156	178	180	207	209	-9	-9	204	208
CI14	Cockburn Island	86	98	155	167	174	186	267	275	138	140	133	139	190	192	115	115	180	180	156	156	180	182	209	211	-9	-9	208	220
CI15	Cockburn Island	90	98	159	163	186	186	271	289	140	154	131	139	190	192	115	115	176	180	140	150	178	178	207	209	-9	-9	204	208
CI16	Cockburn Island	90	98	159	163	184	186	273	273	138	154	131	139	190	192	115	115	176	176	140	156	178	180	207	209	-9	-9	204	208
CI17	Cockburn Island	88	100	155	155	176	186	265	289	142	142	135	141	192	192	115	117	178	180	152	156	178	178	205	209	-9	-9	208	220
CI18	Cockburn Island	88	100	163	167	184	186	267	289	142	156	139	141	194	198	115	115	180	180	156	156	182	182	207	209	-9	-9	204	208
CI19	Cockburn Island	92	100	159	159	178	186	273	287	142	142	139	141	190	198	115	115	176	180	150	156	178	182	207	209	-9	-9	208	220
CI20	Cockburn Island	88	88	163	163	176	190	289	289	154	156	133	141	192	192	115	115	176	180	138	150	180	180	207	213	-9	-9	208	218
CI21	Cockburn Island	86	98	159	167	178	186	267	289	140	140	137	139	190	198	101	115	180	180	156	156	178	178	207	209	-9	-9	204	208
CI22	Cockburn Island	88	96	159	159	186	186	273	275	142	156	135	137	192	198	115	117	176	178	148	152	178	182	209	211	-9	-9	208	220
CI23	Cockburn Island	88	88	159	167	174	184	289	289	140	156	141	141	192	198	115	115	176	180	150	156	-9	-9	209	213	-9	-9	204	204
CI24	Cockburn Island	88	100	159	159	178	190	267	289	142	154	133	141	190	192	115	115	180	180	138	156	178	180	209	213	-9	-9	208	218
CI25	Cockburn Island	88	100	159	163	176	178	289	289	142	154	141	141	190	192	115	115	178	180	138	138	178	180	207	209	-9	-9	204	218
CI26	Cockburn Island	98	98	155	159	186	186	267	275	140	140	131	139	190	190	-9	-9	176	180	-9	-9	178	182	209	211	-9	-9	208	220
CI27	Cockburn Island	88	100	159	159	174	184	289	289	142	142	133	141	190	198	115	115	180	180	156	156	180	180	207	213	-9	-9	204	204
CI28	Cockburn Island	88	92	159	159	186	186	273	289	142	142	139	141	190	192	113	115	176	180	140	156	-9	-9	205	207	-9	-9	208	220
CI29	Cockburn Island	88	100	159	159	174	186	267	273	142	142	137	141	190	198	115	115	176	180	148	156	178	182	205	209	-9	-9	204	208
CI30	Cockburn Island	92	100	157	163	178	186	273	289	138	154	137	141	190	192	115	115	176	180	150	156	178	182	205	207	-9	-9	204	220
CI31	Cockburn Island	86	98	159	159	178	190	267	289	140	154	131	139	190	192	115	115	180	180	138	156	178	180	209	213	-9	-9	208	218
CI32	Cockburn Island	86	98	155	163	176	186	265	289	140	140	133	139	192	192	115	117	178	180	152	156	178	178	205	209	-9	-9	208	220
CI33	Cockburn Island	86	98	155	159	176	186	265	301	156	156	133	137	192	196	111	115	178	180	150	156	178	180	205	207	-9	-9	204	220
CI34	Cockburn Island	88	100	155	159	176	186	265	301	156	156	135	139	192	196	111	115	178	180	150	156	178	180	205	207	-9	-9	204	220
CI35	Cockburn Island	92	96	-9	-9	174	184	265	287	140	158	135	141	194	198	115	115	176	178	138	156	178	180	205	205	-9	-9	208	220
CI36	Cockburn Island	100	100	159	163	178	186	267	289	142	142	133	141	190	194	-9	-9	180	180	-9	-9	178	182	207	209	-9	-9	208	210
CI37	Cockburn Island	86	98	159	167	178	184	267	289	140	156	135	139	190	192	115	115	176	176	156	156	182	182	-9	-9	-9	-9	204	208
CI38	Cockburn Island	88	100	159	163	-9	-9	289	289	142	156	133	141	192	196	115	115	176	180	150	156	180	182	207	209	-9	-9	204	218
CI39	Cockburn Island	88	100	159	163	178	184	267	289	142	154	133	141	190	192	115	115	178	180	138	156	178	180	209	213	-9	-9	208	218
CI40	Cockburn Island	88	96	155	159	176	184	275	301	142	142	133	135	190	192	115	117	180	180	150	152	178	178	209	211	-9	-9	220	220
CI41	Cockburn Island	92	100	159	163	186	186	271	289	142	154	133	141	190	192	115	115	176	180	140	150	-9	-9	207	209	-9	-9	204	208
CI42	Cockburn Island	88	88	159	163	190	190	289	301	140	154	141	141	192	196	115	115	176	180	138	156	180	182	207	209	-9	-9	204	208
CI43	Cockburn Island	100	100	155	159	186	186	267	275	142	142	133	141	190	190	111	115	176	180	156	156	178	182	209	211	-9	-9	208	208
CI44	Cockburn Island	96	100	155	163	184	184	265	267	142	142	133	147	192	194	115	115	178	180	150	152	178	178	209	211	-9	-9	204	220
CI45	Cockburn Island	88	100	159	163	178	184	271	289	132	132	133	137	190	190	115	115	180	180	150	156	180	182	207	207	-9	-9	-9	-9
CI46	Cockburn Island	88	100	155	167	174	186	267	275	140	140	135	141	190	192	-9	-9	180	180	156	156	180	182	209	211	-9	-9	-9	-9
CI47	Cockburn Island	88	100	159	159	186	186	267	273	140	142	139	141	190	198	115	115	176	182	140	156	178	182	205	209	-9	-9	204	208
CI48	Cockburn Island	86	86	159	163	184	186	273	289	138	154	131	139	190	192	115	115	180	180	-9	-9	182	182	207	207	-9	-9	204	218
CI49	Cockburn Island	88	100	159	159	174	184	267	271	140	142	137	141	196	198	115	115	180	180	150	156	178	182	205	207	-9	-9	208	218
CI50	Cockburn Island	88	96	159	163	176	184	275	301	158	166	135	139	192	192	115	117	178	178	156	156	178	180	205	213	-9	-9	208	220
CI51	Cockburn Island	88	100	159	159	176	184	271	301	142	142	133	141	190	192	115	115	176	180	138	148	178	180	207	209	-9	-9	208	208
CI52	Cockburn Island	86	98	159	167	184	184	271	289	138	140	139	139	192	196	115	115	180	180	150	156	180	180	-9	-9	-9	-9	204	218
CI53	Cockburn Island	86	98	159	167	184	184	271	289	138	140	131	139	190	196	115	115	180	180	150	156	-9	-9	207	213	-9	-9	204	218
CI54	Cockburn Island	88	88	159	167	174	176	271	289	144	144	141	141	190	192	115	115	-9	-9	148	150	178	182	207	209	-9	-9	204	208
CI55	Cockburn Island	86	94	159	159	186	186	273	275	140	156	133	135	192	198	115	117	176	178	148	152	178	182	209	211	-9	-9	208	220
CI56	Cockburn Island	86	86	159	167	174	184	289	289	140	156	139	139	192	198	-9	-9	176	180	150	156	180	182	209	213	-9	-9	204	204
